# Supplementary material for: Ts2O mediated deoxygenative C2-dithiocarbamation of quinoline N-oxides with CS2 and amines
Source: Royal Society of Chemistry journal article supplement (doi:10.1039/d4ra02003k), 2024-01-01
Supplement: d4ra02003k1.pdf [file d4ra02003k1.pdf]

# Supporting Information

## Ts<sub>2</sub>O Mediated Deoxygenative C2-dithiocarbamation of Quinoline *N*- oxides with CS<sub>2</sub> and Amines

Long-Yong Xie\*, Chu Liu#, Si-Yu Wang#, Zhong-Ying Tian, and Sha Peng\*

*College of Chemistry and Bioengineering, Hunan University of Science and Engineering, Yongzhou*

*425100, China*

longyongxie@yeah.net

### Table of Content

|                                             |            |
|---------------------------------------------|------------|
| <b>1. General information</b>               | <b>S2</b>  |
| <b>2. Experimental Section</b>              | <b>S2</b>  |
| <b>3. Characterization data of products</b> | <b>S3</b>  |
| <b>4. NMR spectrum of products</b>          | <b>S14</b> |

## 1. General information

Unless otherwise noted, all solvents and reagents in this study were commercial and used without further purification.  $^1\text{H}$ ,  $^{13}\text{C}$  and  $^{19}\text{F}$  NMR spectra were recorded at 400, 100 and 376 MHz, respectively. Chemical shifts were quoted in ppm relative to  $\text{CDCl}_3$  ( $\delta_{\text{H}} = 7.26$ ,  $\delta_{\text{C}} = 77.0$  ppm). Datas are reported as follows: s = singlet, d = doublet, t = triplet, q = quartet, m = multiplet, dd = doublet of doublet, etc. Azine *N*-oxides **1a**, **1t**, **1u**, **1v**, **1w** and **1y** are commercially available and other quinoline *N*-oxides were prepared according to the relevant literatures. The reactions were monitored by thin-layer chromatography (TLC) using GF254 silica gel-coated TLC plates. Mass spectra were performed on a spectrometer operating on ESI-TOF. Melting points were measured on a melting point apparatus and were uncorrected.

## 2. Experimental Section

### General procedure for the synthesis of quinoline-dithiocarbamates **3**

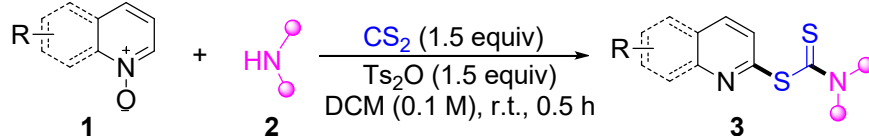

To a round bottom flask was consecutively added quinoline *N*-oxide **1** (0.3 mmol),  $\text{CS}_2$  (0.45 mmol), amine **2** (0.45 mmol) and  $\text{Ts}_2\text{O}$  (0.45 mmol) in  $\text{CH}_2\text{Cl}_2$  (3 mL). The reaction mixture was stirred at room temperature for about 0.5 h. The reaction was monitored by TLC. Upon completion,  $\text{CH}_2\text{Cl}_2$  (10 mL) and water (10 mL) were added to the mixture, the organic layer was separated and the aqueous layer was further extracted with  $\text{CH}_2\text{Cl}_2$  ( $2 \times 10$  mL). The organic phases were combined and dried with anhydrous  $\text{Na}_2\text{SO}_4$ , followed by filtration and concentration under vacuo. The residue was purified by flash chromatography column over silica gel to afford the desired products **3**.

### Procedure for gram-scale Synthesis of **3aa**

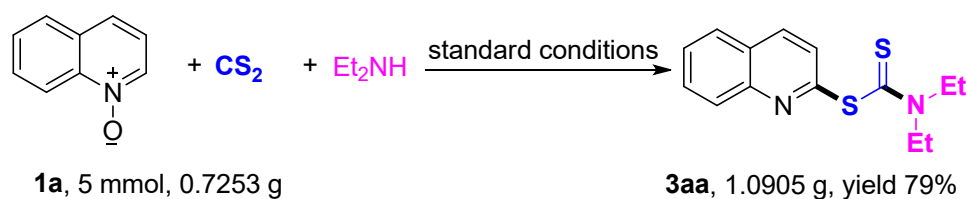

To a round bottom flask was consecutively added quinoline *N*-oxide **1a** (5 mmol, 0.7253 g), CS<sub>2</sub> (7.5 mmol, 0.5696 g), diethylamine **2a** (7.5 mmol, 0.5482 g) and Ts<sub>2</sub>O (7.5 mmol, 2.4452 g) in CH<sub>2</sub>Cl<sub>2</sub> (50 mL). The reaction mixture was stirred at room temperature for about 0.5 h. Upon completion, water (30 mL) was added to quench the reaction. The organic layer was separated and the aqueous layer was further extracted with CH<sub>2</sub>Cl<sub>2</sub> (2 × 20 mL). The organic phases were combined and dried with anhydrous Na<sub>2</sub>SO<sub>4</sub>, followed by filtration and concentration under vacuo. The residue was purified by flash chromatography column over silica gel to afford 1.0905 g of **3aa**, yield: 79%.

### 3. Characterization data of products

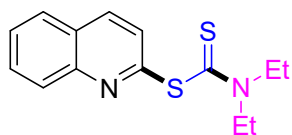

**quinolin-2-yl diethylcarbamodithioate (3aa):** Yellow solid (68.2 mg, 82%), mp: 118–119 °C. <sup>1</sup>H NMR (400 MHz, Chloroform-*d*) δ 8.13 (d, *J* = 8.4 Hz, 2H), 7.80 (d, *J* = 8.1 Hz, 1H), 7.70 (t, *J* = 8.6 Hz, 2H), 7.55 (t, *J* = 7.4 Hz, 1H), 3.99 (q, *J* = 6.8 Hz, 2H), 3.83 (q, *J* = 6.8 Hz, 2H), 1.39 (t, *J* = 6.9 Hz, 3H), 1.26 (t, *J* = 7.0 Hz, 3H); <sup>13</sup>C NMR (100 MHz, Chloroform-*d*) δ 192.8, 153.9, 148.2, 136.2, 129.6, 129.5, 129.3, 127.5, 127.4, 127.3, 49.1, 47.7, 12.7, 11.4; HRMS (ESI) *m/z* calcd. for C<sub>14</sub>H<sub>17</sub>N<sub>2</sub>S<sub>2</sub> [M+H]<sup>+</sup> : 277.0828, found 277.0829.

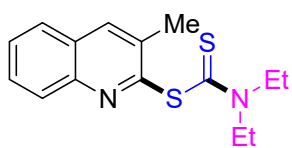

**3-methylquinolin-2-yl diethylcarbamodithioate (3ba):** Yellow solid (62.9 mg, 72%), mp: 122–123 °C. <sup>1</sup>H NMR (400 MHz, Chloroform-*d*) δ 8.13 (d, *J* = 8.5 Hz, 1H), 8.01 (s, 1H), 7.75 (d, *J* = 8.1 Hz, 1H), 7.65 (t, *J* = 7.6 Hz, 1H), 7.53 (t, *J* = 7.5 Hz, 1H), 4.00 (q, *J* = 7.0 Hz, 2H), 3.86 (q, *J* = 7.0 Hz, 2H), 2.60 (s, 3H), 1.42 (t, *J* = 7.1 Hz, 3H), 1.27 (t, *J* = 7.0 Hz, 3H); <sup>13</sup>C NMR (100 MHz, Chloroform-*d*) δ 192.0, 154.2, 147.1, 136.9, 136.1, 129.4, 128.8, 128.5, 127.6, 126.7, 48.9, 47.8, 20.5, 12.8, 11.5; HRMS (ESI) *m/z* calcd. for C<sub>15</sub>H<sub>19</sub>N<sub>2</sub>S<sub>2</sub> [M+H]<sup>+</sup> : 291.0984, found 291.0986.

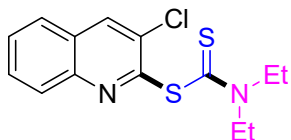

**3-chloroquinolin-2-yl diethylcarbamodithioate (3ca):** Yellow solid (63.2 mg, 68%), mp: 112–114 °C. <sup>1</sup>H NMR (400 MHz, Chloroform-*d*) δ 8.24 (s, 1H), 8.15 (d, *J* = 8.4 Hz, 1H), 7.81 – 7.68 (m, 2H), 7.60 (t, *J* = 7.5 Hz, 1H), 4.02 (q, *J* = 6.7 Hz, 2H), 3.87 (q, *J* = 6.7 Hz, 2H), 1.44 (t, *J* = 6.9 Hz, 3H), 1.30 (t, *J* = 6.8 Hz, 3H); <sup>13</sup>C NMR (100 MHz, Chloroform-*d*) δ 190.7, 152.1, 146.5, 136.1, 133.4, 129.9, 129.6, 128.6, 128.5, 126.6, 49.1, 48.2, 12.9, 11.5; HRMS (ESI) *m/z* calcd. for C<sub>14</sub>H<sub>16</sub>ClN<sub>2</sub>S<sub>2</sub> [M+H]<sup>+</sup> : 311.0438, found 311.0440.

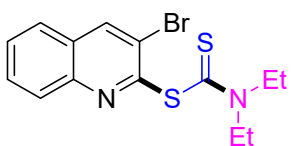

**3-bromoquinolin-2-yl diethylcarbamodithioate (3da):** Yellow solid (67.1 mg, 63%), mp: 116–117 °C. <sup>1</sup>H NMR (400 MHz, Chloroform-*d*) δ 8.44 (s, 1H), 8.14 (d, *J* = 8.5 Hz, 1H), 7.82 – 7.72 (m, 2H), 7.61 (t, *J* = 7.5 Hz, 1H), 4.04 (q, *J* = 7.0 Hz, 2H), 3.87 (q, *J* = 7.1 Hz, 2H), 1.45 (t, *J* = 7.1 Hz, 3H), 1.32 (t, *J* = 7.0 Hz, 3H); <sup>13</sup>C NMR (100 MHz, Chloroform-*d*) δ 190.9, 153.4, 147.0, 139.9, 130.1, 129.7, 128.7, 128.6, 126.6, 124.1, 49.1, 48.3, 13.0, 11.5; HRMS (ESI) *m/z* calcd. for C<sub>14</sub>H<sub>16</sub>BrN<sub>2</sub>S<sub>2</sub> [M+H]<sup>+</sup> : 354.9933, found 354.9937.

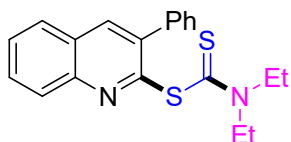

**3-phenylquinolin-2-yl diethylcarbamodithioate (3ea):** Yellow solid (81.3 mg, 77%), mp: 124–125 °C. <sup>1</sup>H NMR (400 MHz, Chloroform-*d*) δ 8.22 (d, *J* = 8.5 Hz, 1H), 8.10 (s, 1H), 7.83 (d, *J* = 8.2 Hz, 1H), 7.73 (t, *J* = 7.6 Hz, 1H), 7.61 – 7.52 (m, 3H), 7.41 – 7.34 (m, 3H), 3.84 (q, *J* = 6.8 Hz, 2H), 3.60 (q, *J* = 6.9 Hz, 2H), 1.17 (t, *J* = 7.0 Hz, 3H), 1.09 (t, *J* = 6.9 Hz, 3H); <sup>13</sup>C NMR (100 MHz, Chloroform-*d*) δ 192.0, 153.1, 147.5, 139.8, 139.0, 137.6, 129.8, 129.6, 129.4, 127.8, 127.5, 127.4, 127.4, 48.7, 47.8, 12.6, 11.3; HRMS (ESI) *m/z* calcd. for C<sub>20</sub>H<sub>21</sub>N<sub>2</sub>S<sub>2</sub> [M+H]<sup>+</sup> : 353.1141, found 353.1146.

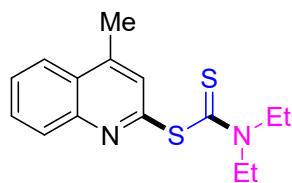

**4-methylquinolin-2-yl diethylcarbamodithioate (3fa):** Yellow solid (59.4 mg, 68%), mp: 116–117 °C. <sup>1</sup>H NMR (400 MHz, Chloroform-*d*) δ 8.14 (d, *J* = 8.3 Hz, 1H), 7.98 (d, *J* = 8.2 Hz, 1H), 7.70 (t, *J* = 7.5 Hz, 1H), 7.64 – 7.54 (m, 2H), 4.02 (q, *J* = 6.6 Hz, 2H), 3.86 (q, *J* = 6.7 Hz, 2H), 2.71 (s, 3H), 1.41 (t, *J* = 6.9 Hz, 3H), 1.29 (t, *J* = 6.8 Hz, 3H); <sup>13</sup>C NMR (100 MHz, Chloroform-*d*) δ 193.1, 153.6, 148.1, 144.8, 130.2, 129.7, 129.4, 127.6, 127.4, 123.7, 49.1, 47.8, 18.6, 12.7, 11.5; HRMS (ESI) *m/z* calcd. for C<sub>15</sub>H<sub>19</sub>N<sub>2</sub>S<sub>2</sub> [M+H]<sup>+</sup> : 291.0984, found 291.0986.

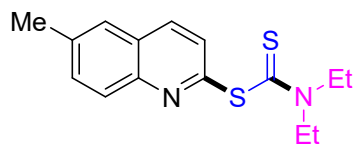

**6-methylquinolin-2-yl diethylcarbamodithioate (3ga):** Yellow solid (67.2 mg, 77%), mp: 127–128 °C. <sup>1</sup>H NMR (400 MHz, Chloroform-*d*) δ 8.12 – 7.99 (m, 2H), 7.67 (d, *J* = 8.4 Hz, 1H), 7.58 (s, 1H), 7.54 (d, *J* = 8.7 Hz, 1H), 4.01 (q, *J* = 7.0 Hz, 2H), 3.85 (q, *J* = 7.0 Hz, 2H), 2.52 (s, 3H), 1.41 (t, *J* = 7.1 Hz, 3H), 1.28 (t, *J* = 7.0 Hz, 3H); <sup>13</sup>C NMR (100 MHz, Chloroform-*d*) δ 193.2, 152.8, 146.9, 137.7, 135.7, 131.9, 129.4, 129.3, 127.5, 126.4, 49.1, 47.7, 21.6, 12.7, 11.5; HRMS (ESI) *m/z* calcd. for C<sub>15</sub>H<sub>19</sub>N<sub>2</sub>S<sub>2</sub> [M+H]<sup>+</sup> : 291.0984, found 291.0987.

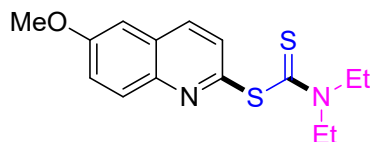

**6-methoxyquinolin-2-yl diethylcarbamodithioate (3ha):** Yellow solid (77.4 mg, 84%), mp: 121–122 °C. <sup>1</sup>H NMR (400 MHz, Chloroform-*d*) δ 8.05 (t, *J* = 8.2 Hz, 2H), 7.67 (d, *J* = 8.4 Hz, 1H), 7.36 (d, *J* = 9.2 Hz, 1H), 7.09 (s, 1H), 4.02 (q, *J* = 6.9 Hz, 2H), 3.94 (s, 3H), 3.87 (q, *J* = 7.0 Hz, 2H), 1.43 (t, *J* = 7.0 Hz, 3H), 1.28 (t, *J* = 7.1 Hz, 3H); <sup>13</sup>C NMR (100 MHz, Chloroform-*d*) δ 193.7, 158.7, 150.9, 144.6, 135.2, 131.2, 130.0, 128.8, 122.5, 105.1, 55.6, 49.3, 47.7, 12.8, 11.5; HRMS (ESI) *m/z* calcd. for C<sub>15</sub>H<sub>19</sub>N<sub>2</sub>OS<sub>2</sub> [M+H]<sup>+</sup> : 307.0933, found 307.0933.

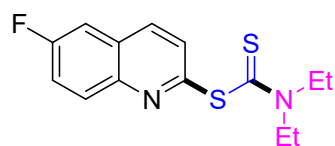

**6-fluoroquinolin-2-yl diethylcarbamdithioate (3ia):** Yellow solid (69.0 mg, 78%), mp: 101–102 °C. <sup>1</sup>H NMR (400 MHz, Chloroform-*d*) δ 8.22 – 8.06 (m, 2H), 7.74 (d, *J* = 8.5 Hz, 1H), 7.55 – 7.39 (m, 2H), 4.02 (q, *J* = 7.0 Hz, 2H), 3.86 (q, *J* = 7.1 Hz, 2H), 1.43 (t, *J* = 7.1 Hz, 3H), 1.29 (t, *J* = 7.0 Hz, 3H); <sup>13</sup>C NMR (100 MHz, Chloroform-*d*) δ 192.8, 161.1 (d, *J*<sub>C-F</sub> = 248.4 Hz), 153.3 (d, *J*<sub>C-F</sub> = 3.0 Hz), 145.4, 135.6 (d, *J*<sub>C-F</sub> = 5.4 Hz), 132.2 (d, *J*<sub>C-F</sub> = 9.2 Hz), 130.3, 128.3 (d, *J*<sub>C-F</sub> = 10.2 Hz), 119.9 (d, *J*<sub>C-F</sub> = 25.6 Hz), 110.7 (d, *J*<sub>C-F</sub> = 21.8 Hz), 49.3, 47.9, 12.8, 11.5; <sup>19</sup>F NMR (376 MHz, Chloroform-*d*) δ -111.29; HRMS (ESI) *m/z* calcd. for C<sub>14</sub>H<sub>16</sub>FN<sub>2</sub>S<sub>2</sub> [M+H]<sup>+</sup> : 295.0733, found 295.0735.

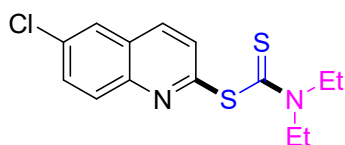

**6-chloroquinolin-2-yl diethylcarbamdithioate (3ja):** Yellow solid (70.9 mg, 76%), mp: 122–123 °C. <sup>1</sup>H NMR (400 MHz, Chloroform-*d*) δ 8.11 – 8.00 (m, 2H), 7.80 (s, 1H), 7.73 (d, *J* = 8.6 Hz, 1H), 7.64 (d, *J* = 8.7 Hz, 1H), 4.01 (q, *J* = 6.9 Hz, 2H), 3.85 (q, *J* = 7.0 Hz, 2H), 1.41 (t, *J* = 7.1 Hz, 3H), 1.28 (t, *J* = 7.0 Hz, 3H); <sup>13</sup>C NMR (100 MHz, Chloroform-*d*) δ 192.5, 154.4, 146.6, 135.2, 133.4, 131.1, 130.6, 130.3, 128.0, 126.2, 49.2, 47.9, 12.8, 11.5; HRMS (ESI) *m/z* calcd. for C<sub>14</sub>H<sub>16</sub>ClN<sub>2</sub>S<sub>2</sub> [M+H]<sup>+</sup> : 311.0438, found 311.0435.

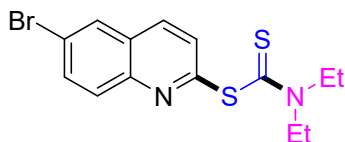

**6-bromoquinolin-2-yl diethylcarbamdithioate (3ka):** Yellow solid (89.5 mg, 84%), mp: 133–134 °C. <sup>1</sup>H NMR (400 MHz, Chloroform-*d*) δ 8.05 (d, *J* = 8.5 Hz, 1H), 7.99 (d, *J* = 8.3 Hz, 2H), 7.76 (dd, *J* = 14.2, 8.9 Hz, 2H), 4.01 (q, *J* = 6.9 Hz, 2H), 3.86 (q, *J* = 7.0 Hz, 2H), 1.42 (t, *J* = 7.1 Hz, 3H), 1.29 (t, *J* = 7.0 Hz, 3H); <sup>13</sup>C NMR (100 MHz, Chloroform-*d*) δ 192.4, 154.6, 146.8, 135.1, 133.2, 131.3, 130.3, 129.6, 128.5, 121.7, 49.2, 47.9, 12.8, 11.5; HRMS (ESI) *m/z* calcd. for C<sub>14</sub>H<sub>16</sub>BrN<sub>2</sub>S<sub>2</sub> [M+H]<sup>+</sup> : 354.9933, found 354.9938.

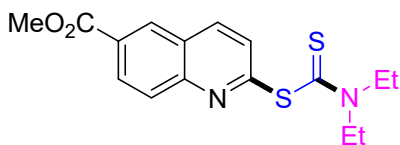

**Methyl 2-((diethylcarbamoithiyl)thio)quinoline-6-carboxylate (3la):** Yellow solid (63.1 mg, 63%), mp: 132–133 °C. <sup>1</sup>H NMR (400 MHz, Chloroform-*d*) δ 8.60 (s, 1H), 8.34 – 8.23 (m, 2H),

8.19 (dd,  $J = 8.8, 3.0$  Hz, 1H), 7.82 (dd,  $J = 8.4, 3.1$  Hz, 1H), 4.07 – 3.83 (m, 7H), 1.52 – 1.24 (m, 6H);  $^{13}\text{C}$  NMR (100 MHz, Chloroform- $d$ )  $\delta$  191.9, 166.4, 156.8, 149.8, 137.4, 130.6, 130.0, 129.7, 129.4, 129.0, 126.6, 52.5, 49.3, 48.1, 12.9, 11.5; HRMS (ESI)  $m/z$  calcd. for  $\text{C}_{16}\text{H}_{19}\text{N}_2\text{O}_2\text{S}_2$   $[\text{M}+\text{H}]^+$  : 335.0882, found 335.0885.

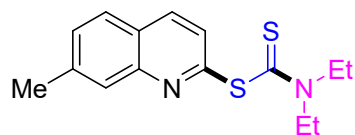

**7-methylquinolin-2-yl diethylcarbamodithioate (3ma):** Yellow solid (59.4 mg, 68%), mp: 126–127 °C.  $^1\text{H}$  NMR (400 MHz, Chloroform- $d$ )  $\delta$  8.11 (d,  $J = 8.4$  Hz, 1H), 7.92 (s, 1H), 7.72 (d,  $J = 8.3$  Hz, 1H), 7.65 (d,  $J = 8.4$  Hz, 1H), 7.42 (d,  $J = 8.3$  Hz, 1H), 4.02 (q,  $J = 6.9$  Hz, 2H), 3.87 (q,  $J = 7.0$  Hz, 2H), 2.55 (s, 3H), 1.42 (t,  $J = 7.1$  Hz, 3H), 1.29 (t,  $J = 7.0$  Hz, 3H);  $^{13}\text{C}$  NMR (100 MHz, Chloroform- $d$ )  $\delta$  193.2, 153.8, 148.6, 140.1, 136.1, 129.9, 128.6, 128.6, 127.2, 125.5, 49.2, 47.8, 21.9, 12.8, 11.5; HRMS (ESI)  $m/z$  calcd. for  $\text{C}_{15}\text{H}_{19}\text{N}_2\text{S}_2$   $[\text{M}+\text{H}]^+$  : 291.0984, found 291.0985.

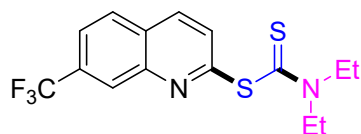

**7-(trifluoromethyl)quinolin-2-yl diethylcarbamodithioate (3na):** Yellow solid (74.3 mg, 72%), mp: 134–135 °C.  $^1\text{H}$  NMR (400 MHz, Chloroform- $d$ )  $\delta$  8.43 (s, 1H), 8.18 (d,  $J = 8.5$  Hz, 1H), 7.93 (d,  $J = 8.5$  Hz, 1H), 7.83 (d,  $J = 8.5$  Hz, 1H), 7.73 (d,  $J = 8.5$  Hz, 1H), 4.01 (q,  $J = 6.9$  Hz, 2H), 3.86 (q,  $J = 7.0$  Hz, 2H), 1.42 (t,  $J = 7.1$  Hz, 3H), 1.29 (t,  $J = 7.0$  Hz, 3H);  $^{13}\text{C}$  NMR (100 MHz, Chloroform- $d$ )  $\delta$  192.0, 156.0, 147.1, 135.9, 131.5, 131.2, 128.8, 128.7, 127.3 (q,  $J_{\text{C-F}} = 4.4$  Hz), 123.7 (q,  $J_{\text{C-F}} = 270.9$  Hz), 123.2 (q,  $J_{\text{C-F}} = 3.0$  Hz), 49.2, 48.0, 12.8, 11.4;  $^{19}\text{F}$  NMR (376 MHz, Chloroform- $d$ )  $\delta$  -62.73; HRMS (ESI)  $m/z$  calcd. for  $\text{C}_{15}\text{H}_{16}\text{F}_3\text{N}_2\text{S}_2$   $[\text{M}+\text{H}]^+$  : 345.0702, found 345.0706.

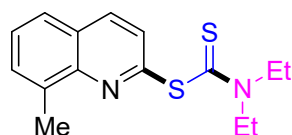

**8-methylquinolin-2-yl diethylcarbamodithioate (3oa):** Yellow solid (65.5 mg, 75%), mp: 71–72 °C.  $^1\text{H}$  NMR (400 MHz, Chloroform- $d$ )  $\delta$  8.11 (d,  $J = 8.5$  Hz, 1H), 7.72 (d,  $J = 8.5$  Hz, 1H), 7.66 (d,  $J = 8.0$  Hz, 1H), 7.56 (d,  $J = 6.9$  Hz, 1H), 7.46 (t,  $J = 7.5$  Hz, 1H), 4.05 (q,  $J = 6.9$  Hz, 2H), 3.89 (q,  $J = 7.0$  Hz, 2H), 2.81 (s, 3H), 1.44 (t,  $J = 7.1$  Hz, 3H), 1.32 (t,  $J = 7.0$  Hz, 3H);  $^{13}\text{C}$  NMR

(100 MHz, Chloroform-*d*)  $\delta$  193.3, 153.3, 147.5, 137.6, 136.3, 129.8, 128.7, 127.4, 127.3, 125.5, 49.2, 47.9, 18.0, 12.9, 11.6; HRMS (ESI)  $m/z$  calcd. for  $C_{15}H_{19}N_2S_2$   $[M+H]^+$  : 291.0984, found 291.0987.

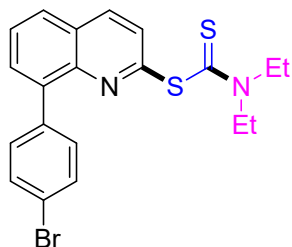

**8-(4-bromophenyl)quinolin-2-yl diethylcarbamodithioate (3pa):** Yellow solid (87.9 mg, 68%), mp: 74–75 °C.  $^1H$  NMR (400 MHz, Chloroform-*d*)  $\delta$  8.17 (d,  $J$  = 8.5 Hz, 1H), 7.83 (d,  $J$  = 8.0 Hz, 1H), 7.78 – 7.70 (m, 2H), 7.62 (dt,  $J$  = 26.1, 8.2 Hz, 5H), 4.03 (q,  $J$  = 6.9 Hz, 2H), 3.84 (q,  $J$  = 6.9 Hz, 2H), 1.37 (t,  $J$  = 7.0 Hz, 3H), 1.31 (t,  $J$  = 7.0 Hz, 3H);  $^{13}C$  NMR (100 MHz, Chloroform-*d*)  $\delta$  192.7, 154.6, 145.5, 139.3, 137.8, 136.4, 132.6, 130.9, 130.3, 128.5, 127.8, 127.6, 127.2, 121.7, 49.1, 48.1, 12.9, 11.5; HRMS (ESI)  $m/z$  calcd. for  $C_{20}H_{20}BrN_2S_2$   $[M+H]^+$  : 431.0246, found 431.0252.

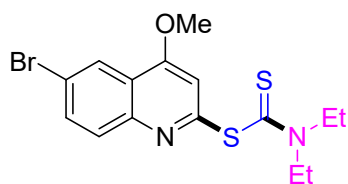

**6-bromo-4-methoxyquinolin-2-yl diethylcarbamodithioate (3qa):** Yellow solid (83.2 mg, 72%), mp: 124–125 °C.  $^1H$  NMR (400 MHz, Chloroform-*d*)  $\delta$  8.33 (s, 1H), 7.92 (d,  $J$  = 8.9 Hz, 1H), 7.75 (d,  $J$  = 9.3 Hz, 1H), 7.15 (s, 1H), 4.08 – 3.97 (m, 5H), 3.85 (q,  $J$  = 6.9 Hz, 2H), 1.41 (t,  $J$  = 7.0 Hz, 3H), 1.29 (t,  $J$  = 6.9 Hz, 3H);  $^{13}C$  NMR (100 MHz, Chloroform-*d*)  $\delta$  192.4, 161.1, 155.3, 147.4, 133.5, 130.8, 124.5, 122.0, 120.8, 109.2, 56.1, 49.2, 47.8, 12.8, 11.5; HRMS (ESI)  $m/z$  calcd. for  $C_{15}H_{18}BrN_2OS_2$   $[M+H]^+$  : 385.0038, found 385.0034.

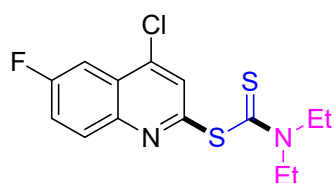

**4-chloro-6-fluoroquinolin-2-yl diethylcarbamodithioate (3ra):** Yellow solid (63.2 mg, 64%), mp: 126–127 °C.  $^1H$  NMR (400 MHz, Chloroform-*d*)  $\delta$  8.15 (dd,  $J$  = 9.1, 5.3 Hz, 1H), 7.83 (d,  $J$  = 8.3 Hz, 2H), 7.52 (t,  $J$  = 8.4 Hz, 1H), 4.00 (q,  $J$  = 7.1 Hz, 2H), 3.83 (q,  $J$  = 7.2 Hz, 2H), 1.41 (t,  $J$  =



7.1 Hz, 3H), 1.28 (t,  $J = 7.0$  Hz, 3H);  $^{13}\text{C}$  NMR (100 MHz, Chloroform- $d$ )  $\delta$  191.9, 161.8 (d,  $J_{\text{C-F}} = 249.8$  Hz), 153.0, 145.7, 141.2 (d,  $J = 5.7$  Hz), 132.7 (d,  $J = 9.2$  Hz), 130.1, 129.7, 120.8 (d,  $J = 25.8$  Hz), 108.1 (d,  $J = 24.4$  Hz), 49.3, 47.9, 12.8, 11.4;  $^{19}\text{F}$  NMR (376 MHz, Chloroform- $d$ )  $\delta$  -108.76; HRMS (ESI)  $m/z$  calcd. for  $\text{C}_{14}\text{H}_{15}\text{ClFN}_2\text{S}_2$   $[\text{M}+\text{H}]^+$  : 329.0344, found 329.0346.

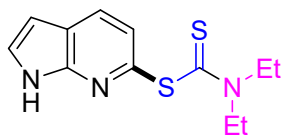

**1H-pyrrolo[2,3-b]pyridin-6-yl diethylcarbamodithioate (3sa):** Pale yellow solid (62.3 mg, 78%), mp: 174–4175 °C.  $^1\text{H}$  NMR (400 MHz, Chloroform- $d$ )  $\delta$  11.31 (s, 1H), 8.02 (d,  $J = 8.0$  Hz, 1H), 7.41 (d,  $J = 7.5$  Hz, 2H), 6.53 (s, 1H), 4.05 (q,  $J = 6.9$  Hz, 2H), 3.90 (q,  $J = 6.9$  Hz, 2H), 1.45 (t,  $J = 7.0$  Hz, 3H), 1.31 (t,  $J = 6.9$  Hz, 3H);  $^{13}\text{C}$  NMR (100 MHz, Chloroform- $d$ )  $\delta$  195.1, 149.0, 144.1, 129.6, 127.4, 125.0, 120.9, 100.7, 49.4, 47.5, 12.8, 11.6; HRMS (ESI)  $m/z$  calcd. for  $\text{C}_{12}\text{H}_{16}\text{N}_3\text{S}_2$   $[\text{M}+\text{H}]^+$  : 266.0780, found 266.0783.

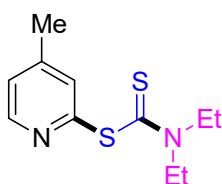

**4-methylpyridin-2-yl diethylcarbamodithioate (3ta):** Yellow oil (44.1 mg, 61%).  $^1\text{H}$  NMR (400 MHz, Chloroform- $d$ )  $\delta$  8.53 (s, 1H), 7.47 (s, 1H), 7.15 (s, 1H), 4.09 – 3.94 (m, 2H), 3.81 (s, 2H), 2.39 (s, 3H), 1.39 (t,  $J = 5.6$  Hz, 3H), 1.31 – 1.24 (m, 3H);  $^{13}\text{C}$  NMR (100 MHz, Chloroform- $d$ )  $\delta$  193.8, 153.2, 150.1, 148.6, 134.0, 125.1, 49.4, 47.7, 20.9, 12.7, 11.5; HRMS (ESI)  $m/z$  calcd. for  $\text{C}_{11}\text{H}_{17}\text{N}_2\text{S}_2$   $[\text{M}+\text{H}]^+$  : 241.0828, found 241.0830.

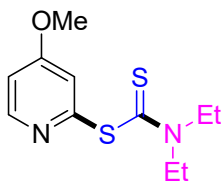

**4-methoxypyridin-2-yl diethylcarbamodithioate (3ua):** Yellow oil (28.5 mg, 37%).  $^1\text{H}$  NMR (400 MHz, Chloroform- $d$ )  $\delta$  8.47 (d,  $J = 5.6$  Hz, 1H), 7.19 (s, 1H), 6.85 (d,  $J = 4.5$  Hz, 1H), 4.00 (q,  $J = 6.8$  Hz, 2H), 3.87 (s, 3H), 3.82 (q,  $J = 7.1$  Hz, 2H), 1.38 (t,  $J = 7.0$  Hz, 3H), 1.27 (t,  $J = 6.9$  Hz, 3H);  $^{13}\text{C}$  NMR (100 MHz, Chloroform- $d$ )  $\delta$  193.3, 166.2, 154.6, 151.2, 119.0, 110.6, 55.4, 49.4, 12.7, 11.5; HRMS (ESI)  $m/z$  calcd. for  $\text{C}_{11}\text{H}_{17}\text{N}_2\text{OS}_2$   $[\text{M}+\text{H}]^+$  : 257.0777, found 257.0778.

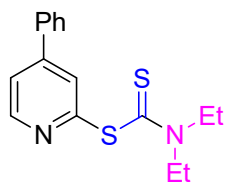

**4-phenylpyridin-2-yl diethylcarbamodithioate (3va):** Yellow oil (58.2 mg, 64%).  $^1\text{H}$  NMR (400 MHz, Chloroform-*d*)  $\delta$  8.70 (d,  $J = 5.1$  Hz, 1H), 7.89 (s, 1H), 7.67 (d,  $J = 7.1$  Hz, 2H), 7.54 (d,  $J = 4.1$  Hz, 1H), 7.47 (q,  $J = 10.0, 8.5$  Hz, 3H), 4.03 (q,  $J = 6.6$  Hz, 2H), 3.86 (q,  $J = 6.7$  Hz, 2H), 1.42 (t,  $J = 6.9$  Hz, 3H), 1.29 (t,  $J = 6.9$  Hz, 3H);  $^{13}\text{C}$  NMR (100 MHz, Chloroform-*d*)  $\delta$  193.4, 154.2, 150.6, 149.5, 137.3, 131.3, 129.3, 129.1, 127.1, 121.9, 49.5, 47.7, 12.7, 11.5; HRMS (ESI)  $m/z$  calcd. for  $\text{C}_{16}\text{H}_{19}\text{N}_2\text{S}_2$   $[\text{M}+\text{H}]^+$  : 303.0984, found 303.0989.

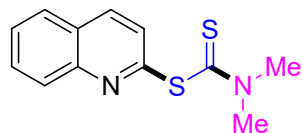

**quinolin-2-yl dimethylcarbamodithioate (3ab):** Yellow solid (62.0 mg, 83%), mp: 133–134 °C.  $^1\text{H}$  NMR (400 MHz, Chloroform-*d*)  $\delta$  8.20 – 8.11 (m, 2H), 7.84 (d,  $J = 8.1$  Hz, 1H), 7.73 (t,  $J = 8.6$  Hz, 2H), 7.59 (t,  $J = 7.5$  Hz, 1H), 3.54 (s, 3H), 3.51 (s, 3H);  $^{13}\text{C}$  NMR (100 MHz, Chloroform-*d*)  $\delta$  194.5, 153.9, 148.3, 136.6, 129.8, 129.6, 129.1, 127.7, 127.6, 127.5, 45.0, 42.5; HRMS (ESI)  $m/z$  calcd. for  $\text{C}_{12}\text{H}_{13}\text{N}_2\text{S}_2$   $[\text{M}+\text{H}]^+$  : 249.0515, found 249.0516.

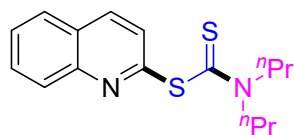

**quinolin-2-yl dipropylcarbamodithioate (3ac):** Yellow oil (78.7 mg, 86%).  $^1\text{H}$  NMR (400 MHz, Chloroform-*d*)  $\delta$  8.12 (d,  $J = 8.4$  Hz, 2H), 7.80 (d,  $J = 8.0$  Hz, 1H), 7.69 (t,  $J = 9.1$  Hz, 2H), 7.55 (t,  $J = 7.4$  Hz, 1H), 3.94 – 3.81 (m, 2H), 3.79 – 3.66 (m, 2H), 1.95 – 1.71 (m, 4H), 1.00 (t,  $J = 7.1$  Hz, 3H), 0.91 (t,  $J = 7.2$  Hz, 3H);  $^{13}\text{C}$  NMR (100 MHz, Chloroform-*d*)  $\delta$  193.2, 154.1, 148.1, 136.1, 129.6, 129.4, 129.2, 127.5, 127.4, 127.3, 56.3, 55.3, 20.9, 19.5, 11.1; HRMS (ESI)  $m/z$  calcd. for  $\text{C}_{16}\text{H}_{21}\text{N}_2\text{S}_2$   $[\text{M}+\text{H}]^+$  : 305.1141, found 305.1144.

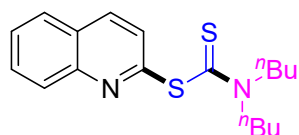

**quinolin-2-yl dibutylcarbamodithioate (3ad):** Yellow oil (80.9 mg, 81%).  $^1\text{H}$  NMR (400 MHz,

Chloroform-*d*)  $\delta$  8.14 (d,  $J = 8.4$  Hz, 2H), 7.82 (d,  $J = 8.1$  Hz, 1H), 7.71 (t,  $J = 9.6$  Hz, 2H), 7.57 (t,  $J = 7.5$  Hz, 1H), 4.02 – 3.86 (m, 2H), 3.86 – 3.71 (m, 2H), 1.91 – 1.67 (m, 4H), 1.51 – 1.29 (m, 4H), 1.00 (t,  $J = 7.3$  Hz, 3H), 0.93 (t,  $J = 7.3$  Hz, 3H);  $^{13}\text{C}$  NMR (100 MHz, Chloroform-*d*)  $\delta$  193.1, 154.2, 148.2, 136.2, 129.6, 129.6, 129.3, 127.5, 127.5, 127.4, 54.7, 53.6, 29.6, 28.3, 20.0, 13.8, 13.6; HRMS (ESI)  $m/z$  calcd. for  $\text{C}_{18}\text{H}_{25}\text{N}_2\text{S}_2$   $[\text{M}+\text{H}]^+$  : 333.1454, found 333.1455.

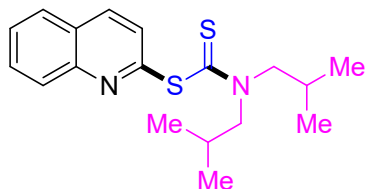

**quinolin-2-yl diisobutylcarbamodithioate (3ae):** Yellow oil (72.9 mg, 73%).  $^1\text{H}$  NMR (400 MHz, Chloroform-*d*)  $\delta$  8.13 (d,  $J = 8.4$  Hz, 2H), 7.82 (d,  $J = 8.1$  Hz, 1H), 7.76 – 7.64 (m, 2H), 7.57 (t,  $J = 7.5$  Hz, 1H), 3.86 (d,  $J = 7.3$  Hz, 2H), 3.70 (d,  $J = 7.4$  Hz, 2H), 2.52 – 2.39 (m, 2H), 1.04 (d,  $J = 6.5$  Hz, 6H), 0.95 (d,  $J = 6.5$  Hz, 6H);  $^{13}\text{C}$  NMR (100 MHz, Chloroform-*d*)  $\delta$  194.3, 154.6, 148.2, 136.1, 129.6, 129.6, 129.2, 127.5, 127.5, 127.3, 62.7, 62.1, 28.0, 26.2, 20.3, 20.2; HRMS (ESI)  $m/z$  calcd. for  $\text{C}_{18}\text{H}_{25}\text{N}_2\text{S}_2$   $[\text{M}+\text{H}]^+$  : 333.1454, found 333.1452.

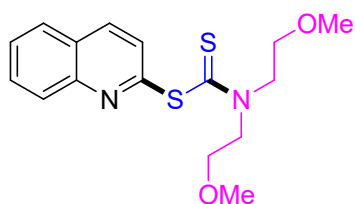

**quinolin-2-yl bis(2-methoxyethyl)carbamodithioate (3af):** Yellow oil (62.7 mg, 62%).  $^1\text{H}$  NMR (400 MHz, Chloroform-*d*)  $\delta$  8.15 (t,  $J = 8.7$  Hz, 2H), 7.83 (d,  $J = 8.1$  Hz, 1H), 7.72 (d,  $J = 8.3$  Hz, 2H), 7.58 (t,  $J = 7.5$  Hz, 1H), 4.29 (t,  $J = 4.9$  Hz, 2H), 4.18 (t,  $J = 5.5$  Hz, 2H), 3.79 (t,  $J = 5.5$  Hz, 2H), 3.72 (t,  $J = 4.9$  Hz, 2H), 3.40 (s, 3H), 3.33 (s, 3H);  $^{13}\text{C}$  NMR (100 MHz, Chloroform-*d*)  $\delta$  194.8, 153.8, 148.3, 136.5, 129.8, 129.6, 129.3, 127.7, 127.5, 127.5, 70.0, 70.0, 59.0, 58.9, 55.5, 54.7; HRMS (ESI)  $m/z$  calcd. for  $\text{C}_{16}\text{H}_{21}\text{N}_2\text{O}_2\text{S}_2$   $[\text{M}+\text{H}]^+$  : 337.1039, found 337.1034.

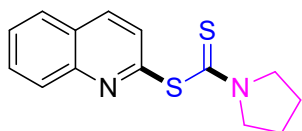

**quinolin-2-yl pyrrolidine-1-carbodithioate (3ag):** Yellow solid (71.8 mg, 87%), mp: 135–136 °C.  $^1\text{H}$  NMR (400 MHz, Chloroform-*d*)  $\delta$  8.18 (d,  $J = 8.5$  Hz, 1H), 8.13 (d,  $J = 8.5$  Hz, 1H), 7.83 (d,  $J = 8.1$  Hz, 1H), 7.79 – 7.68 (m, 2H), 7.58 (t,  $J = 7.5$  Hz, 1H), 3.91 (t,  $J = 6.9$  Hz, 2H), 3.81 (t,  $J =$

6.8 Hz, 2H), 2.15 – 2.07 (m, 2H), 2.04 – 1.95 (m, 2H);  $^{13}\text{C}$  NMR (100 MHz, Chloroform-*d*)  $\delta$  190.0, 153.5, 148.3, 136.4, 129.7, 129.6, 129.1, 127.7, 127.6, 127.5, 54.8, 51.5, 26.3, 24.4; HRMS (ESI)  $m/z$  calcd. for  $\text{C}_{14}\text{H}_{15}\text{N}_2\text{S}_2$   $[\text{M}+\text{H}]^+$  : 275.0671, found 275.0674.

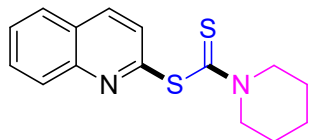

**quinolin-2-yl piperidine-1-carbodithioate (3ah):** Yellow solid (72.0 mg, 83%), mp: 107–108 °C.  $^1\text{H}$  NMR (400 MHz, Chloroform-*d*)  $\delta$  8.23 – 8.08 (m, 2H), 7.83 (d,  $J = 8.1$  Hz, 1H), 7.72 (t,  $J = 7.8$  Hz, 2H), 7.58 (t,  $J = 7.4$  Hz, 1H), 4.26 (s, 2H), 3.98 (s, 2H), 1.73 (s, 6H);  $^{13}\text{C}$  NMR (100 MHz, Chloroform-*d*)  $\delta$  192.6, 154.1, 148.3, 136.3, 129.7, 129.6, 129.1, 127.6, 127.5, 127.4, 52.6, 52.4, 26.2, 25.3, 24.0; HRMS (ESI)  $m/z$  calcd. for  $\text{C}_{15}\text{H}_{17}\text{N}_2\text{S}_2$   $[\text{M}+\text{H}]^+$  : 289.0828, found 289.0833.

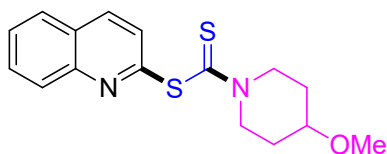

**quinolin-2-yl 4-methoxypiperidine-1-carbodithioate (3ai):** Yellow solid (77.5 mg, 81%), mp: 100–101 °C.  $^1\text{H}$  NMR (400 MHz, Chloroform-*d*)  $\delta$  8.26 – 8.08 (m, 2H), 7.84 (d,  $J = 8.1$  Hz, 1H), 7.77 – 7.65 (m, 2H), 7.59 (t,  $J = 7.5$  Hz, 1H), 4.52 – 3.94 (m, 4H), 3.62 – 3.53 (m, 1H), 3.38 (s, 3H), 2.04 – 1.74 (m, 4H);  $^{13}\text{C}$  NMR (100 MHz, Chloroform-*d*)  $\delta$  193.1, 153.9, 148.3, 136.4, 129.8, 129.6, 129.1, 127.7, 127.6, 127.4, 73.8, 56.0, 48.0, 47.9, 30.6, 29.7; HRMS (ESI)  $m/z$  calcd. for  $\text{C}_{16}\text{H}_{19}\text{N}_2\text{OS}_2$   $[\text{M}+\text{H}]^+$  : 319.0933, found 319.0941.

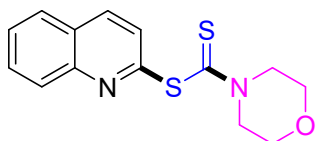

**quinolin-2-yl morpholine-4-carbodithioate (3aj):** Yellow solid (72.5 mg, 83%), mp: 167–168 °C.  $^1\text{H}$  NMR (400 MHz, Chloroform-*d*)  $\delta$  8.21 – 8.12 (m, 2H), 7.85 (d,  $J = 8.1$  Hz, 1H), 7.78 – 7.66 (m, 2H), 7.60 (t,  $J = 7.5$  Hz, 1H), 4.43 – 3.96 (m, 4H), 3.85 – 3.76 (m, 4H);  $^{13}\text{C}$  NMR (100 MHz, Chloroform-*d*)  $\delta$  194.5, 153.4, 148.4, 136.6, 129.9, 129.6, 128.9, 127.8, 127.6, 127.5, 66.3, 66.0, 51.4, 51.0; HRMS (ESI)  $m/z$  calcd. for  $\text{C}_{14}\text{H}_{15}\text{N}_2\text{OS}_2$   $[\text{M}+\text{H}]^+$  : 291.0620, found 291.0624.

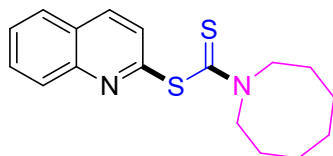

**quinolin-2-yl azocane-1-carbodithioate (3ak):** Yellow solid (72.3 mg, 76%), mp: 79–80 °C. <sup>1</sup>H NMR (400 MHz, Chloroform-*d*) δ 8.15 (d, *J* = 8.4 Hz, 2H), 7.83 (d, *J* = 8.2 Hz, 1H), 7.72 (t, *J* = 9.1 Hz, 2H), 7.58 (t, *J* = 7.4 Hz, 1H), 4.20 – 4.08 (m, 2H), 4.04 – 3.94 (m, 2H), 2.05 – 1.91 (m, 4H), 1.79 – 1.52 (m, 8H); <sup>13</sup>C NMR (100 MHz, Chloroform-*d*) δ 193.7, 154.2, 148.3, 136.2, 129.7, 129.6, 129.4, 127.6, 127.5, 127.4, 56.1, 55.0, 26.6, 25.6, 25.3, 25.1; HRMS (ESI) *m/z* calcd. for C<sub>17</sub>H<sub>21</sub>N<sub>2</sub>S<sub>2</sub> [M+H]<sup>+</sup> : 317.1141, found 317.1140.

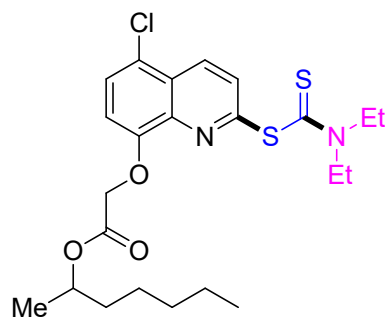

**heptan-2-yl2-((5-chloro-2-((diethylcarbamothioyl)thio)quinolin-8-yl)oxy)acetate (4ca):** Yellow solid (107.3 mg, 74%), mp: 55–56 °C. <sup>1</sup>H NMR (400 MHz, Chloroform-*d*) δ 8.47 (d, *J* = 8.7 Hz, 1H), 7.88 (d, *J* = 8.7 Hz, 1H), 7.48 (d, *J* = 8.4 Hz, 1H), 6.89 (d, *J* = 8.4 Hz, 1H), 4.98 (q, *J* = 6.2 Hz, 1H), 4.91 (s, 2H), 3.99 (q, *J* = 6.6 Hz, 2H), 3.83 (q, *J* = 6.7 Hz, 2H), 1.59 – 1.48 (m, 1H), 1.44 – 1.34 (m, 4H), 1.28 – 1.08 (m, 12H), 0.86 – 0.78 (m, 3H); <sup>13</sup>C NMR (100 MHz, Chloroform-*d*) δ 192.4, 168.2, 154.4, 152.9, 140.4, 132.9, 130.8, 127.0, 126.4, 123.3, 110.6, 72.5, 66.7, 49.1, 47.8, 35.5, 31.4, 24.8, 22.4, 19.8, 13.8, 12.8, 11.4; HRMS (ESI) *m/z* calcd. for C<sub>23</sub>H<sub>32</sub>ClN<sub>2</sub>O<sub>3</sub>S<sub>2</sub> [M+H]<sup>+</sup> : 483.1537, found 483.1542.

#### 4. NMR spectrum of products

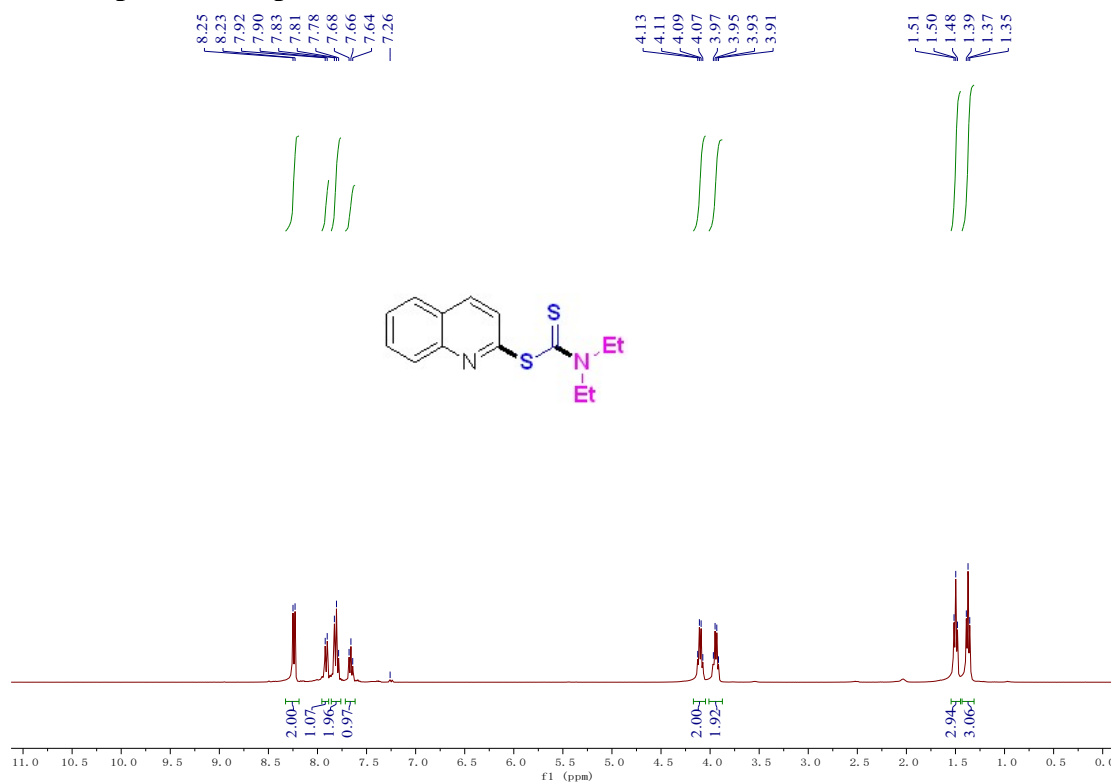

<sup>1</sup>H spectrum of compound **3aa**

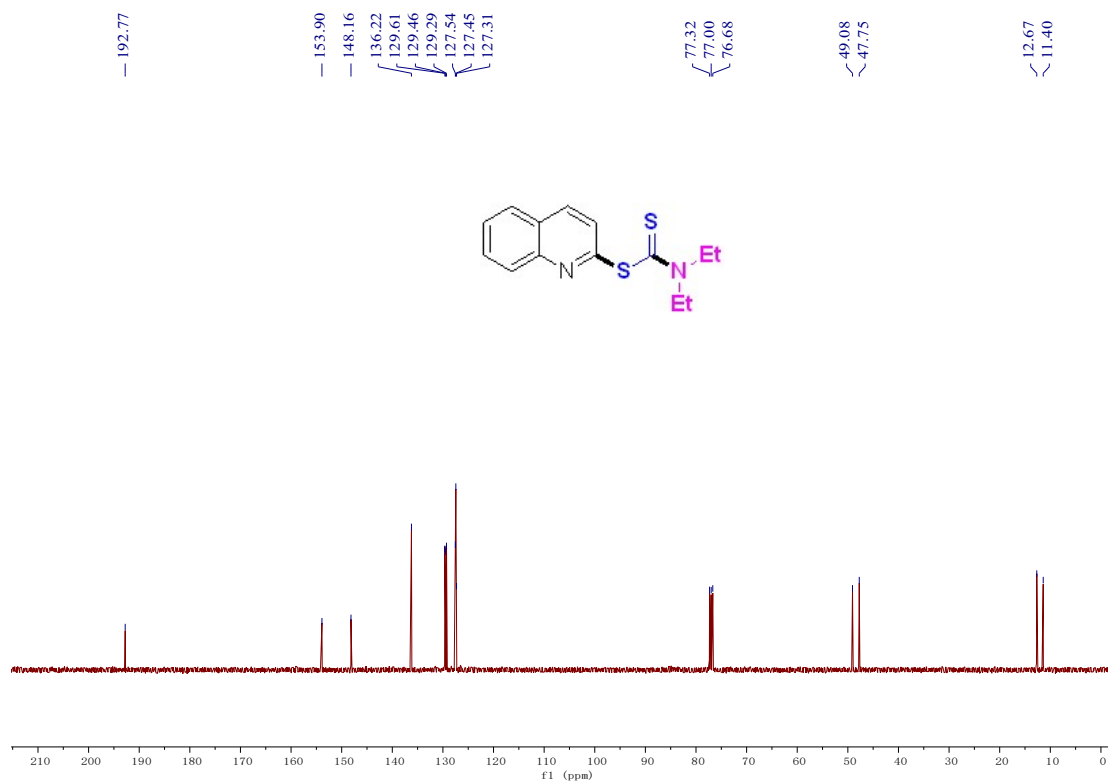

<sup>13</sup>C spectrum of compound **3aa**

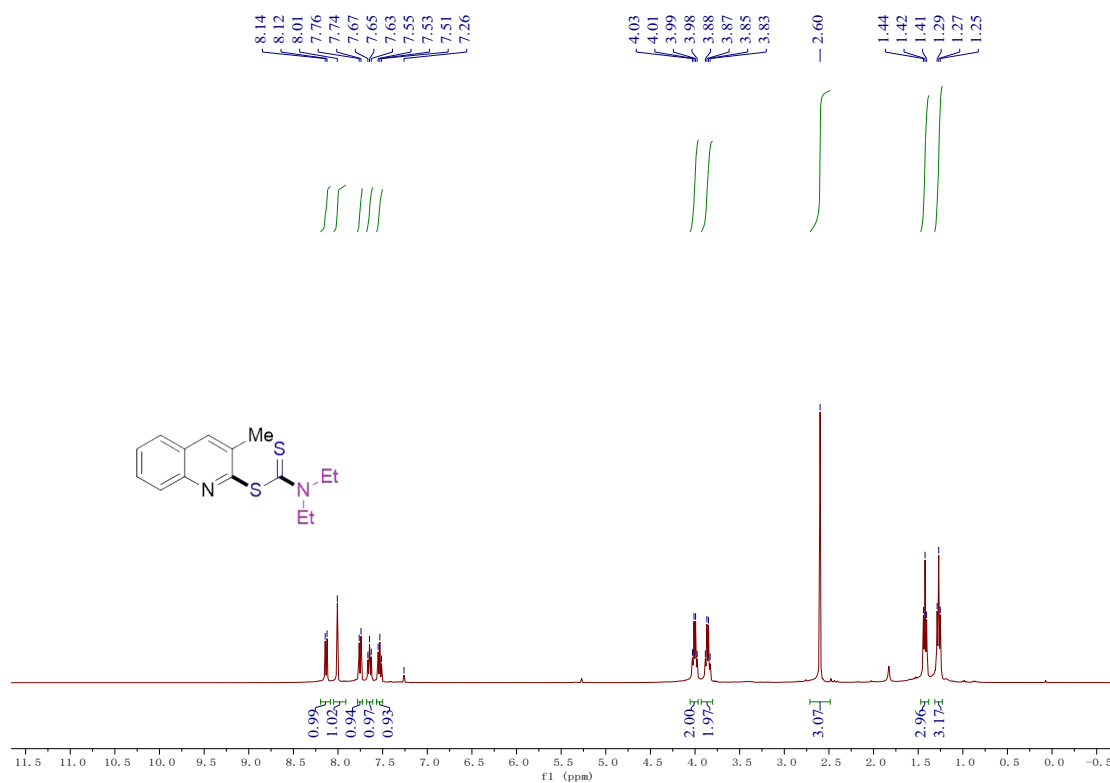

<sup>1</sup>H spectrum of compound 3ba

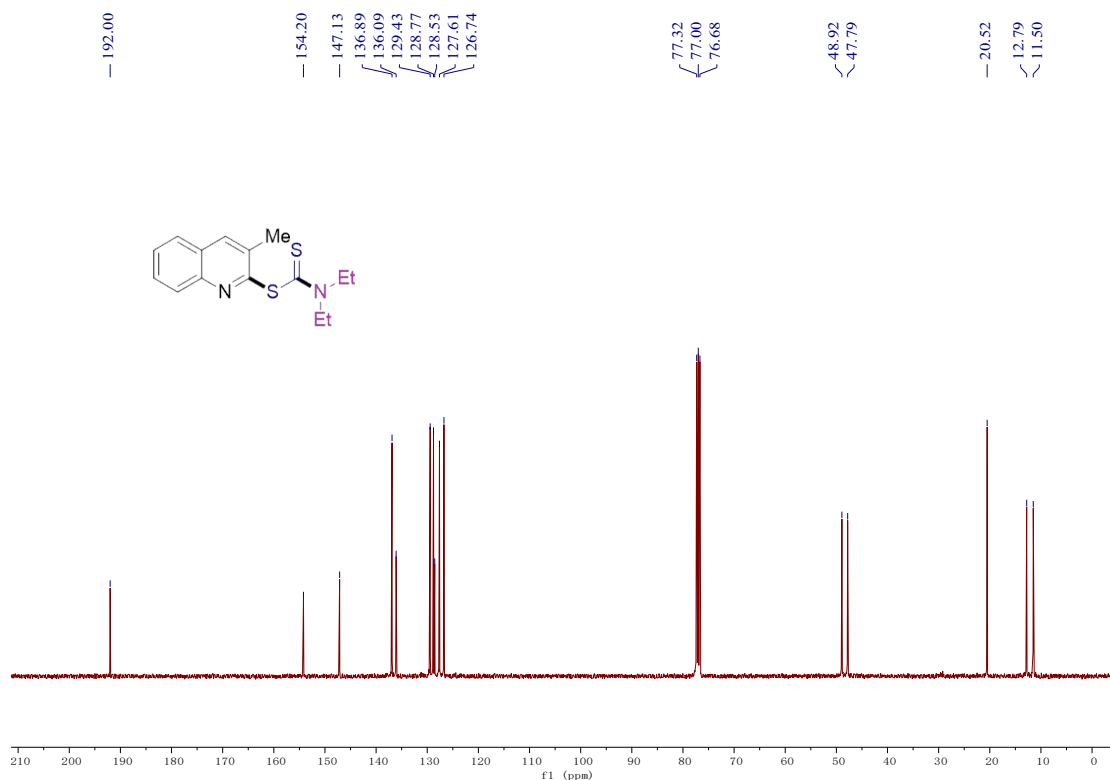

<sup>13</sup>C spectrum of compound 3ba

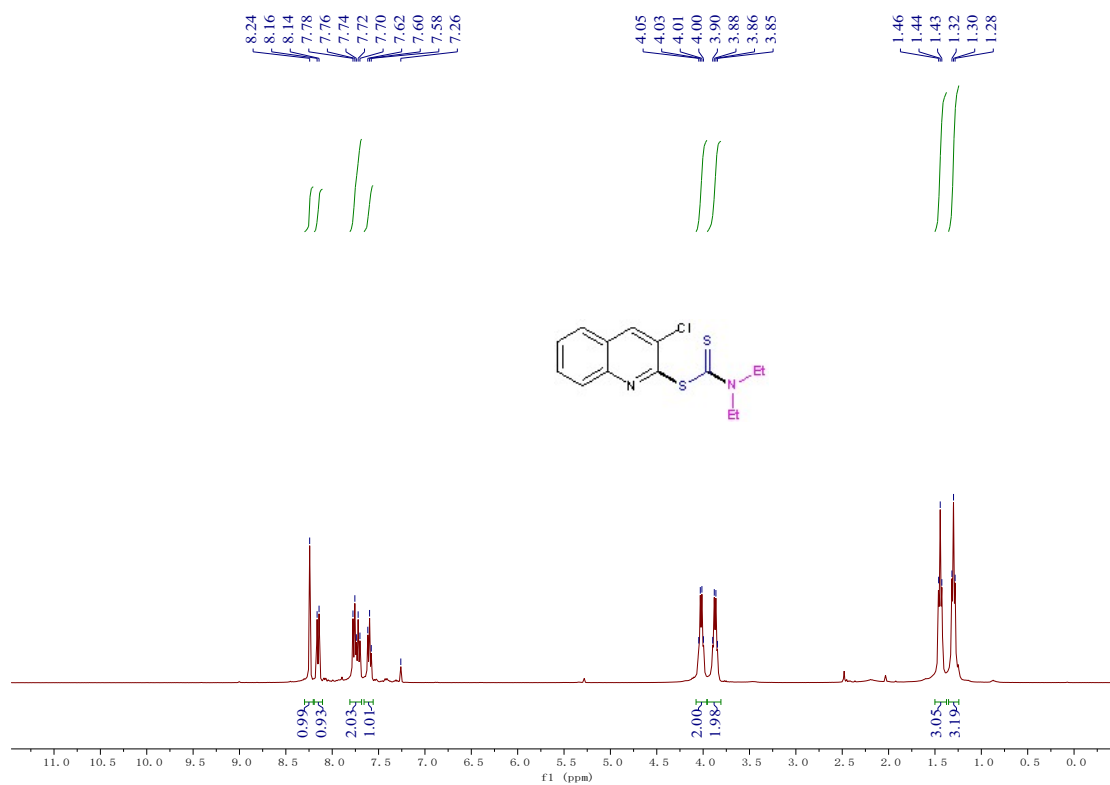

<sup>1</sup>H spectrum of compound 3ca

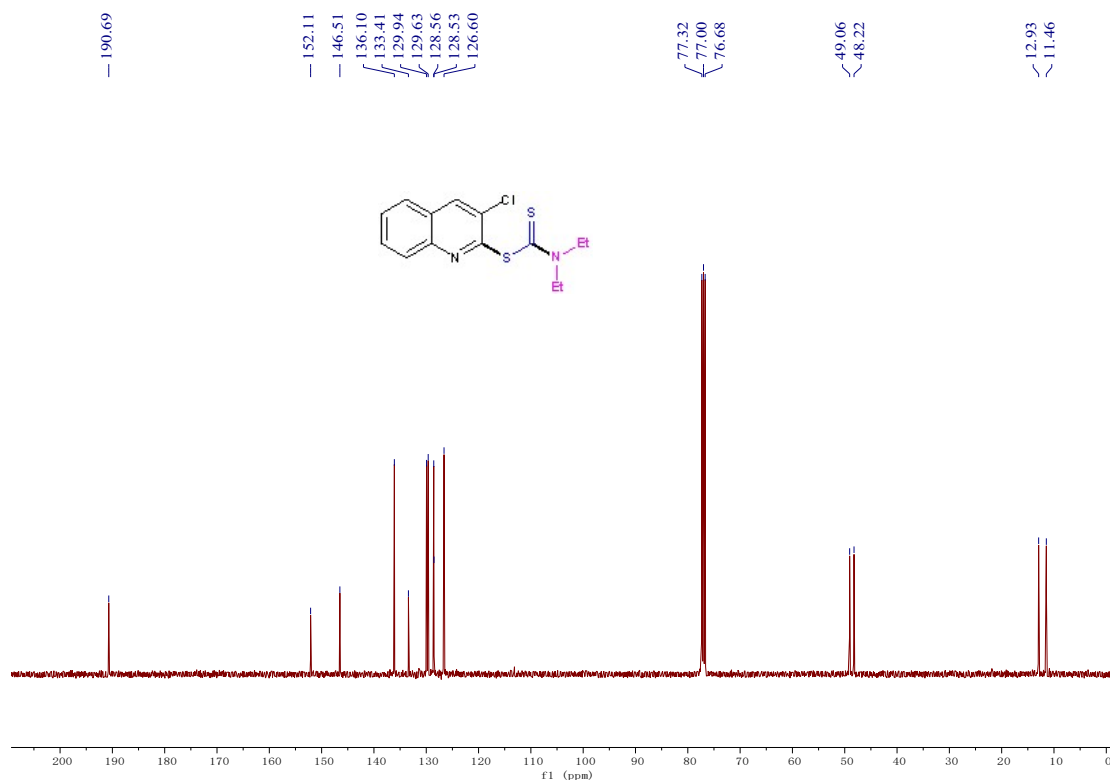

<sup>13</sup>C spectrum of compound 3ca



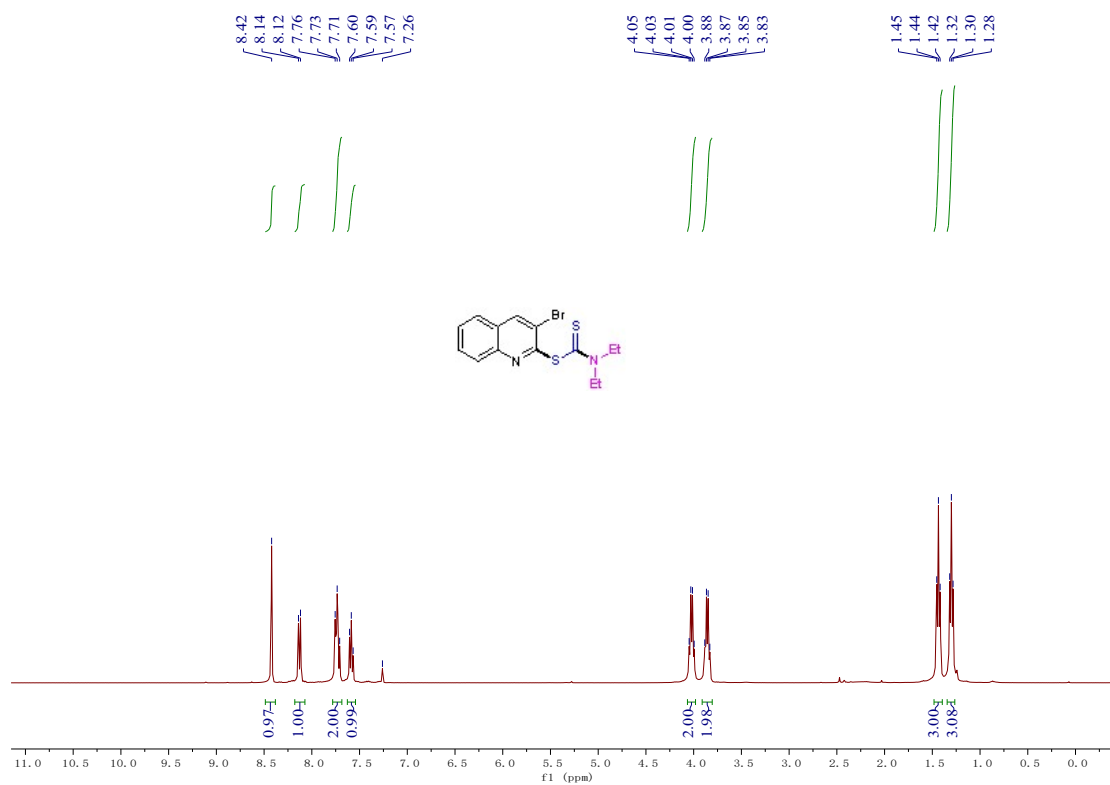

<sup>1</sup>H spectrum of compound 3da

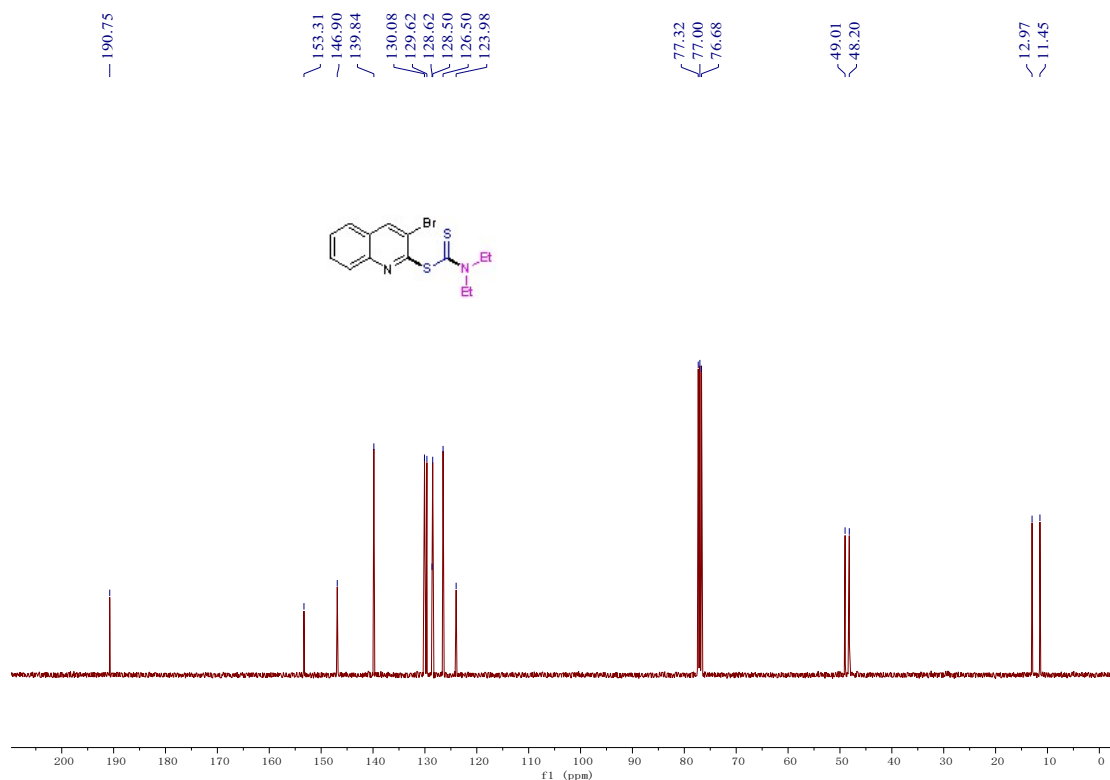

<sup>13</sup>C spectrum of compound 3da

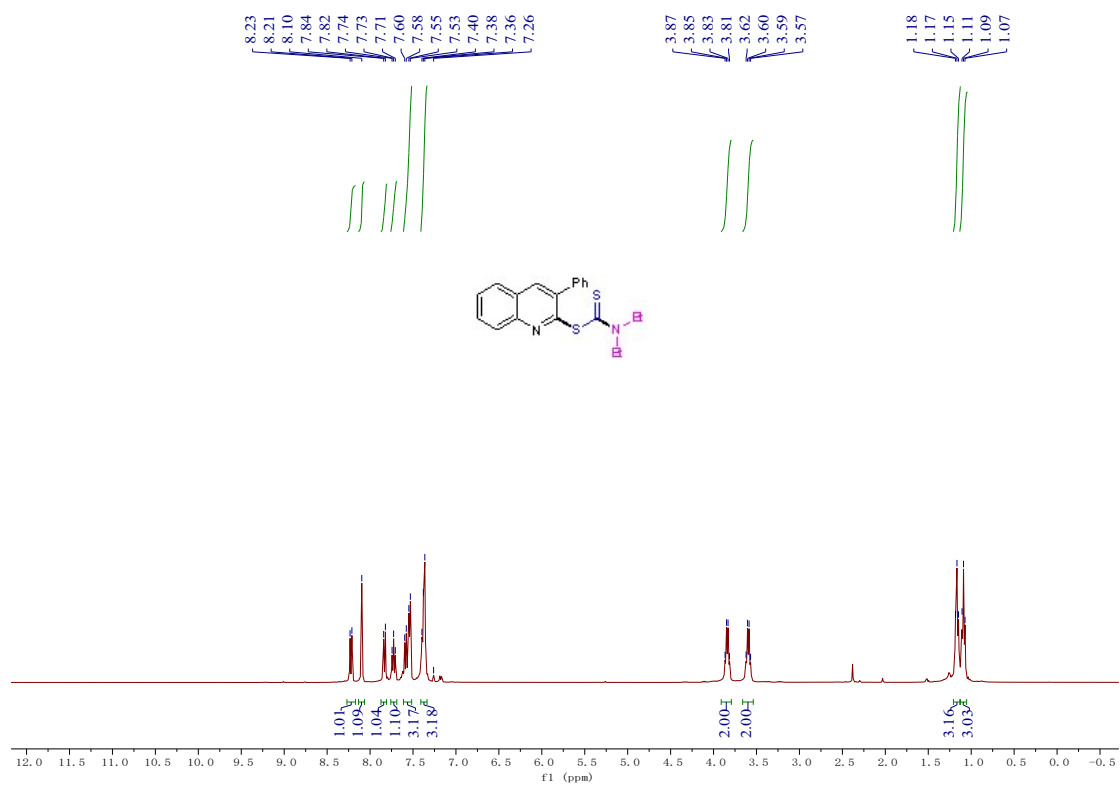

<sup>1</sup>H spectrum of compound 3ea

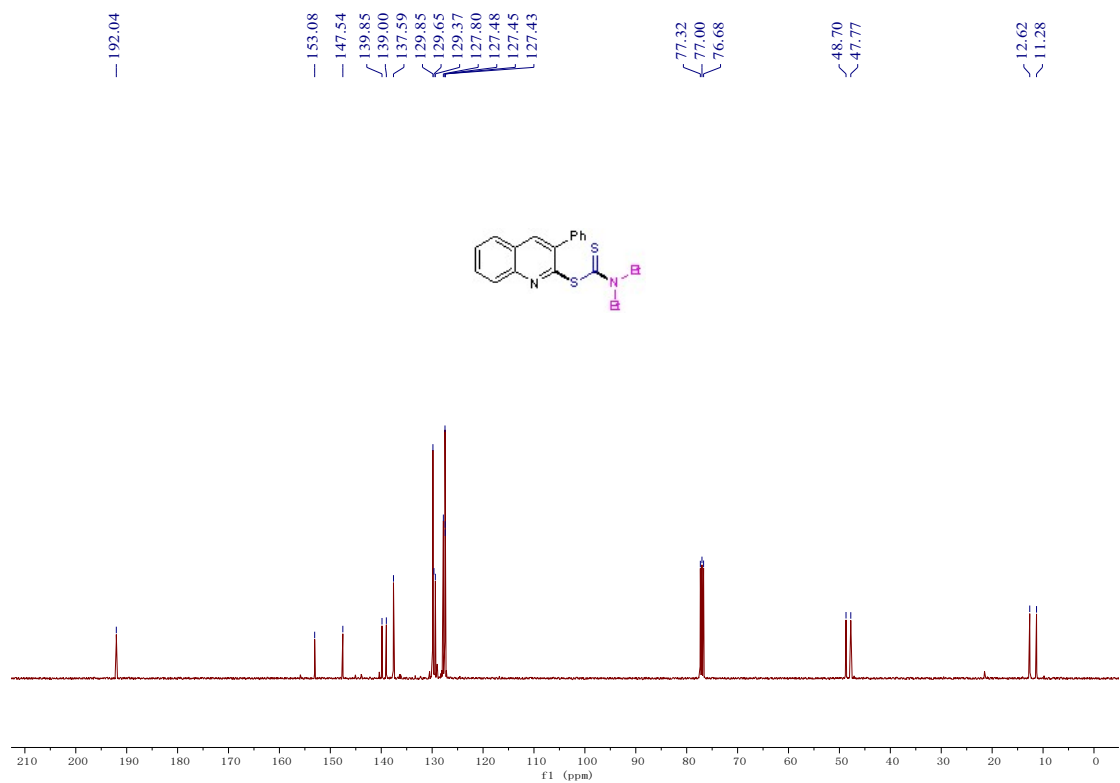

<sup>13</sup>C spectrum of compound 3ea

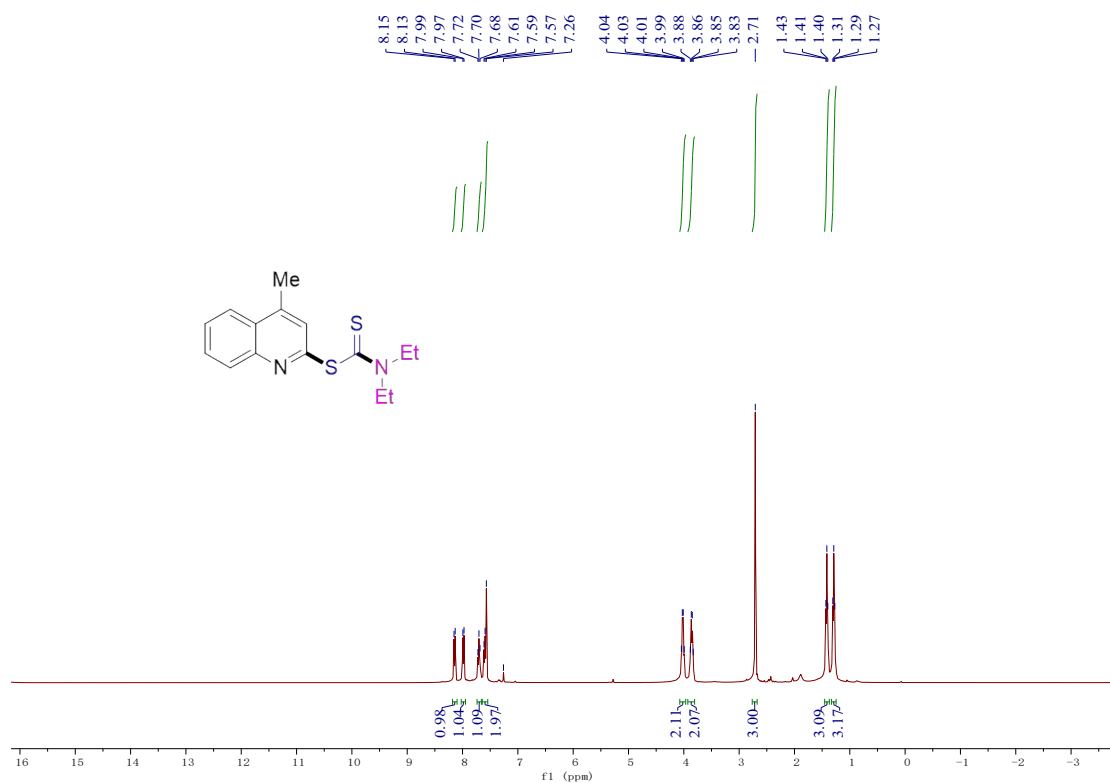

<sup>1</sup>H spectrum of compound 3fa

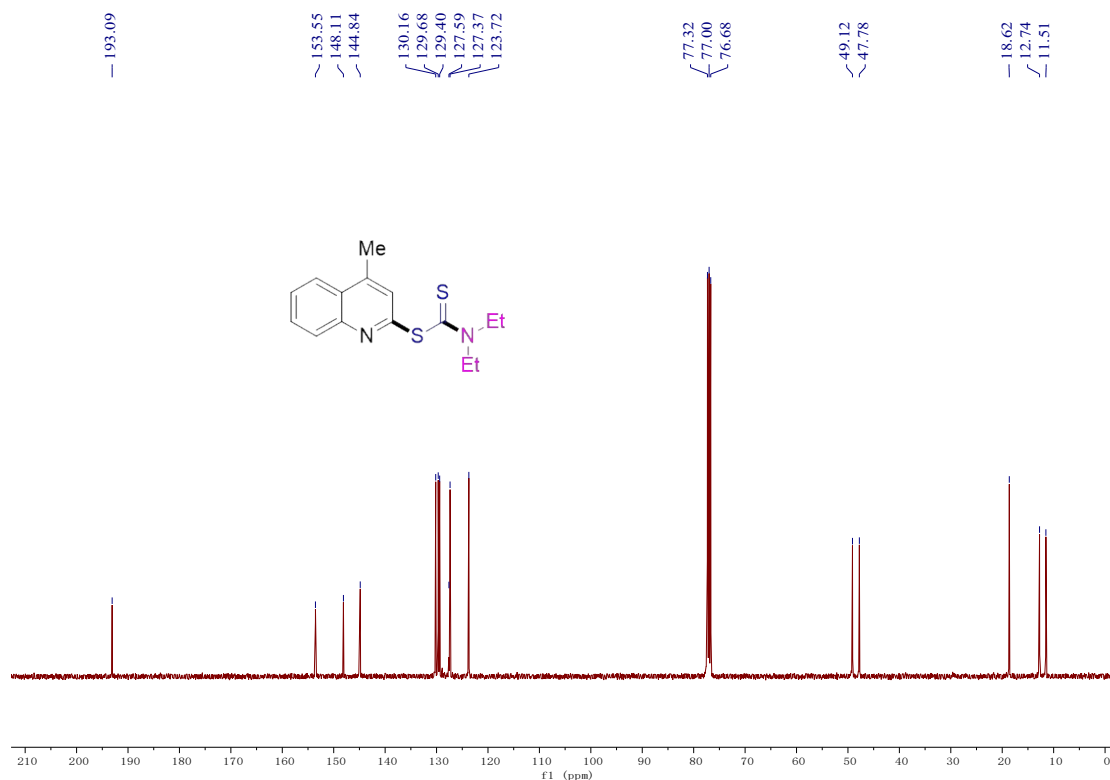

<sup>13</sup>C spectrum of compound 3fa

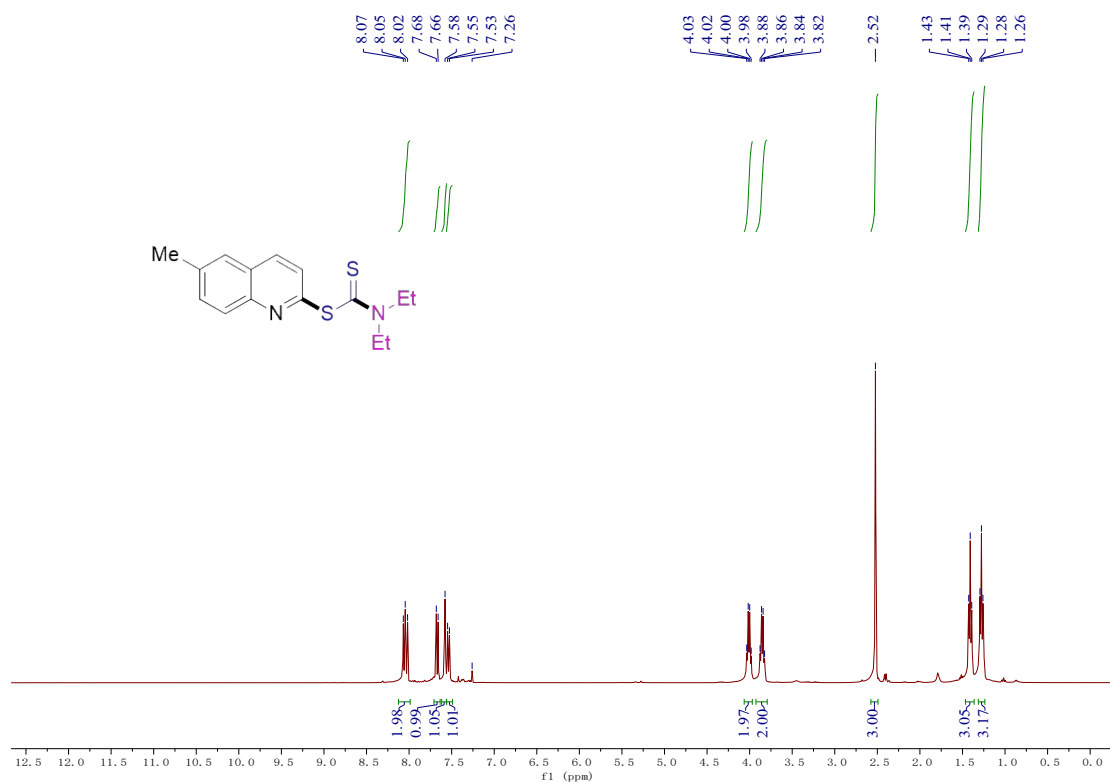

<sup>1</sup>H spectrum of compound 3ga

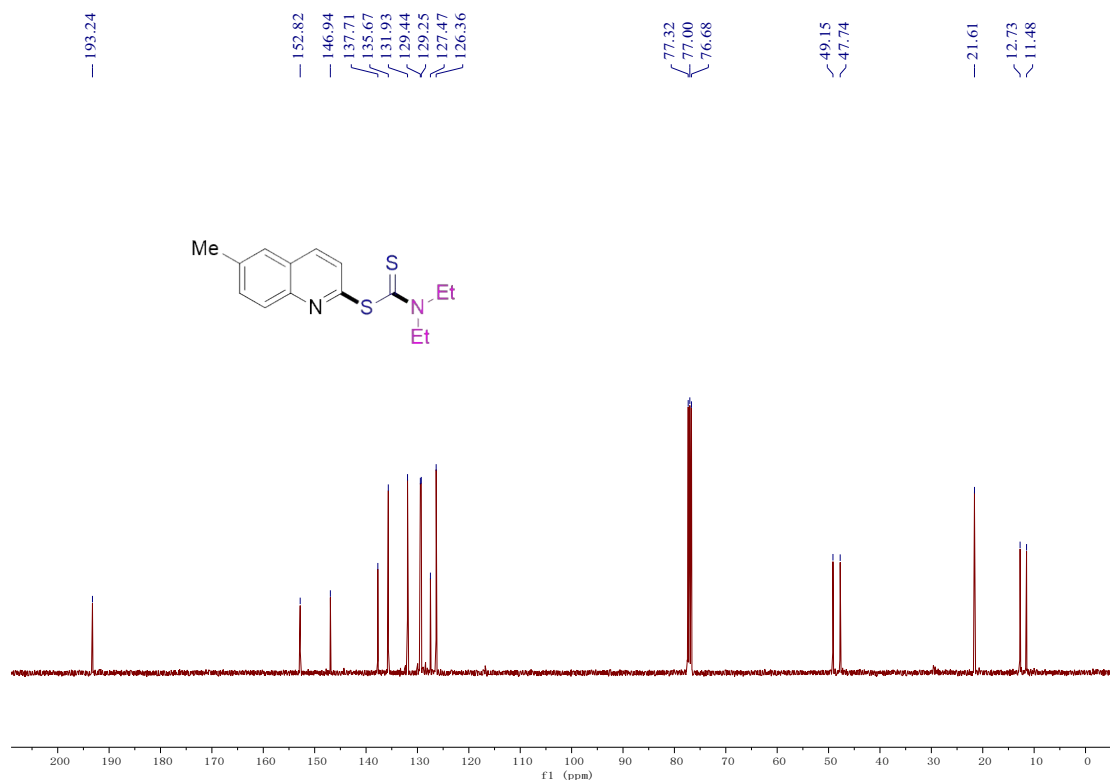

<sup>13</sup>C spectrum of compound 3ga

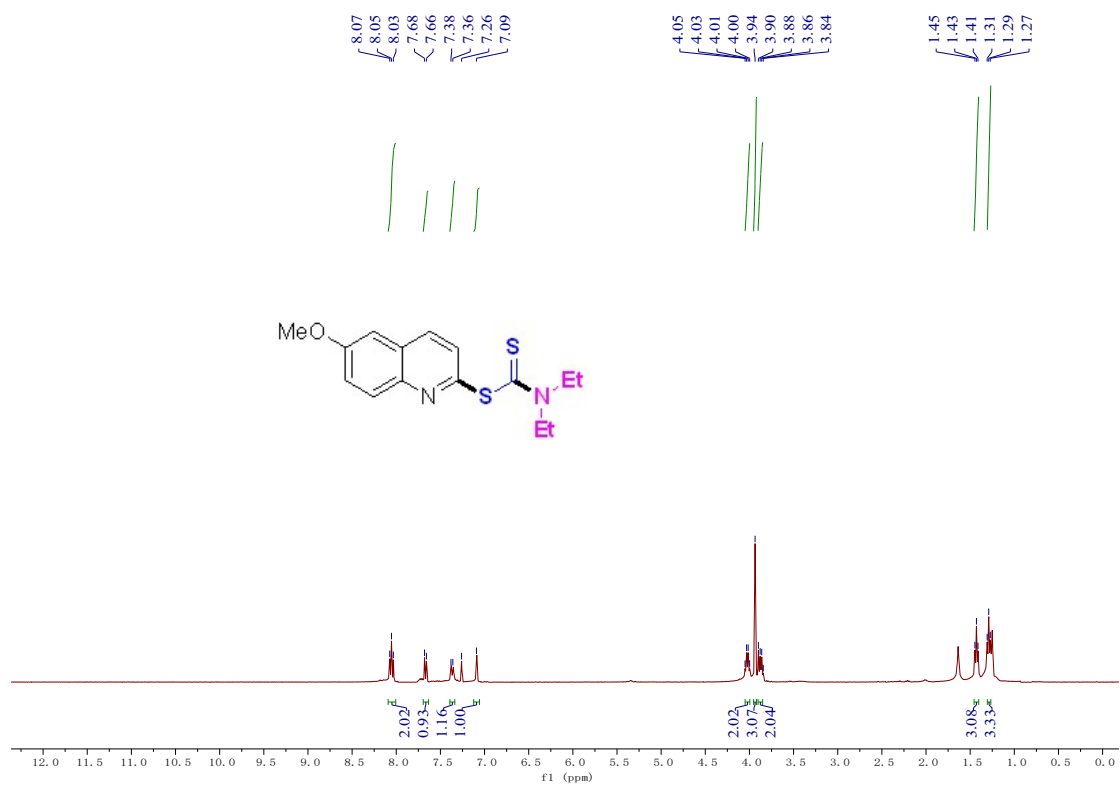

<sup>1</sup>H spectrum of compound 3ha

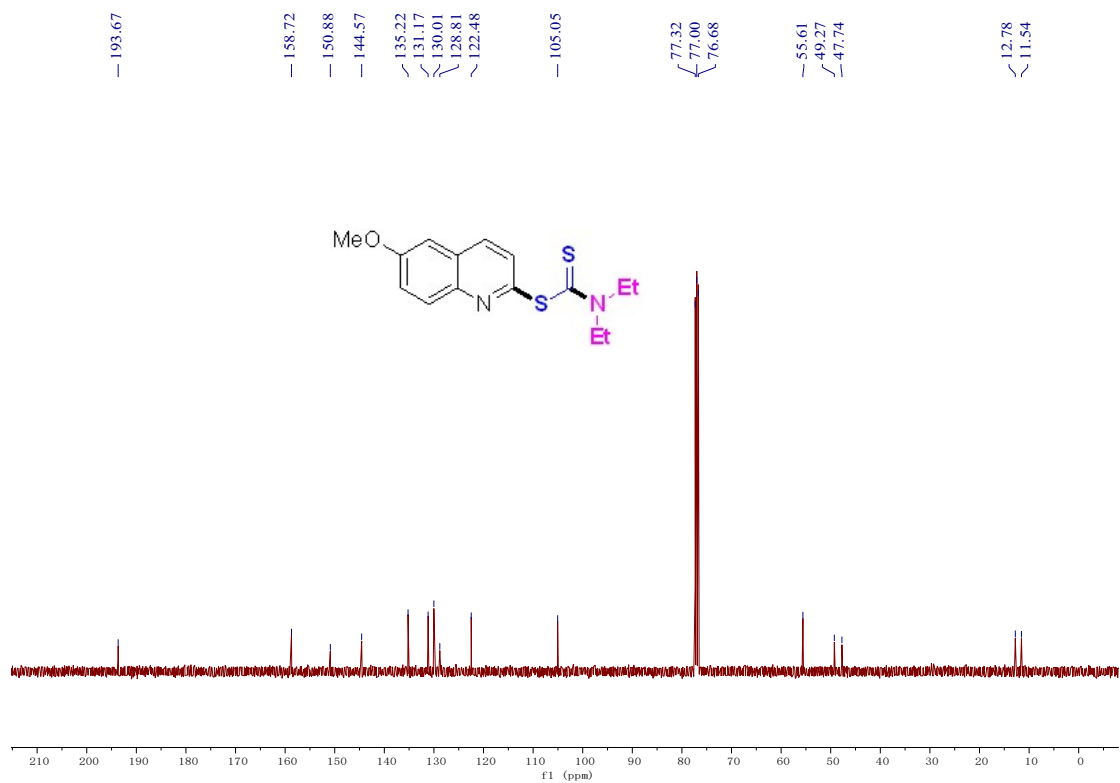

<sup>13</sup>C spectrum of compound 3ha

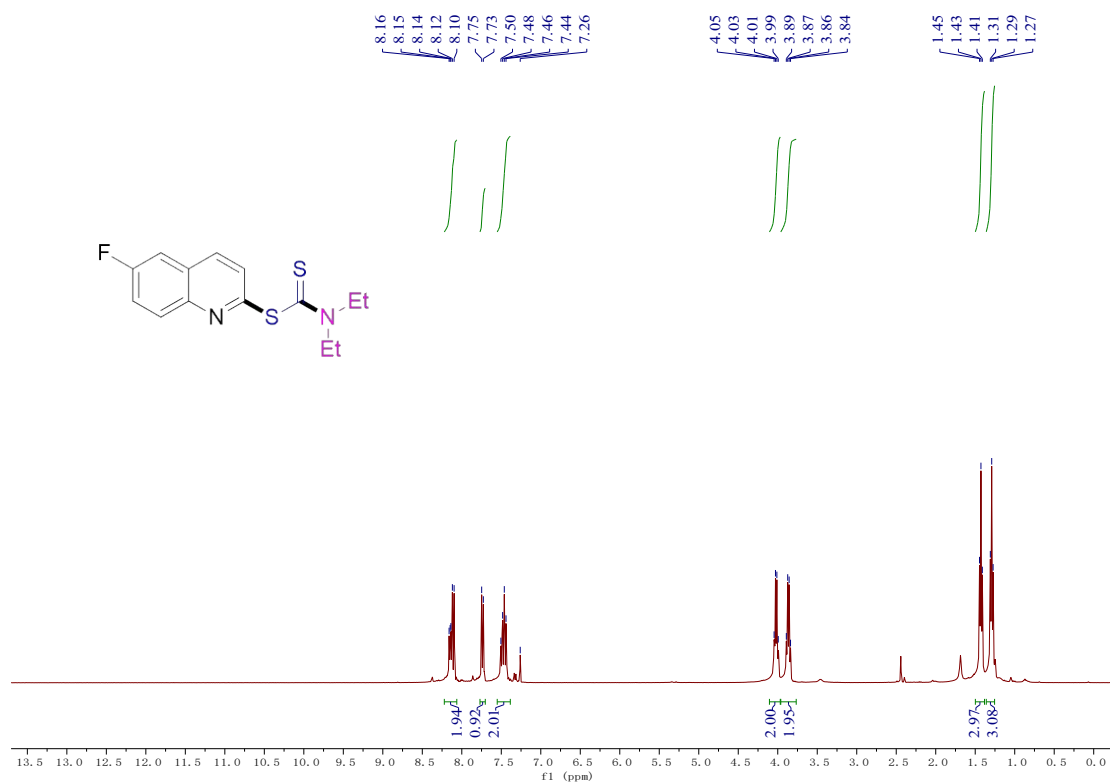

<sup>1</sup>H spectrum of compound **3ia**

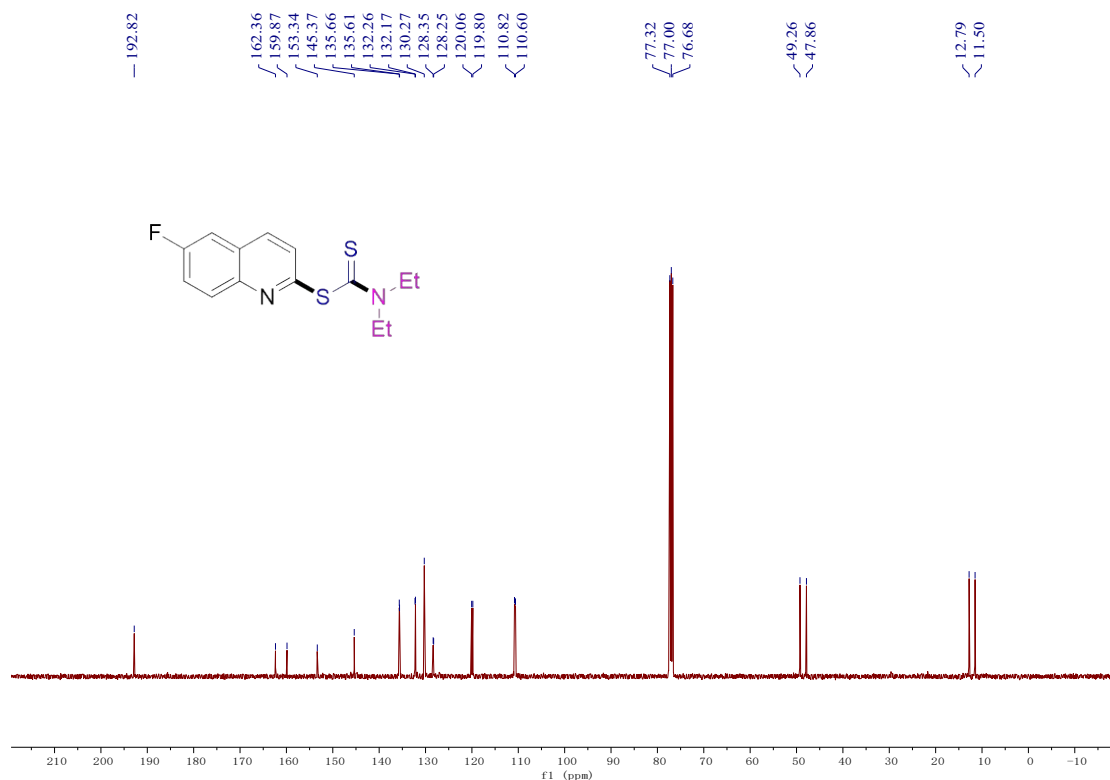

<sup>13</sup>C spectrum of compound **3ia**

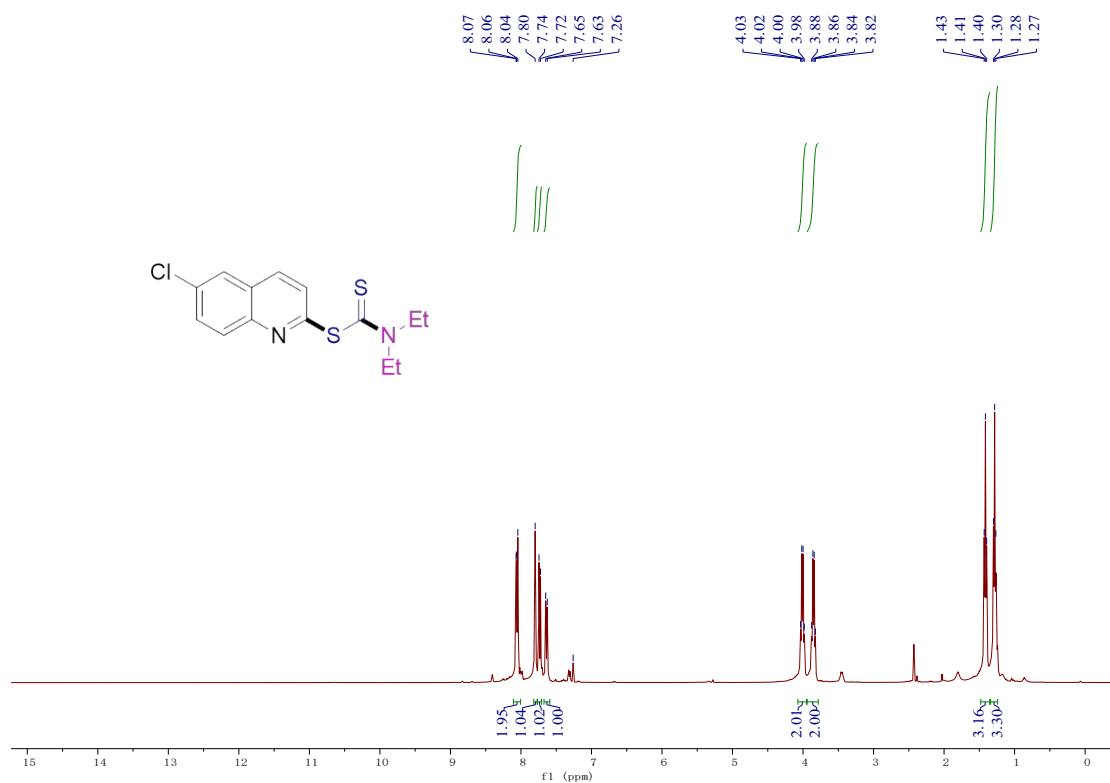

<sup>1</sup>H spectrum of compound **3ja**

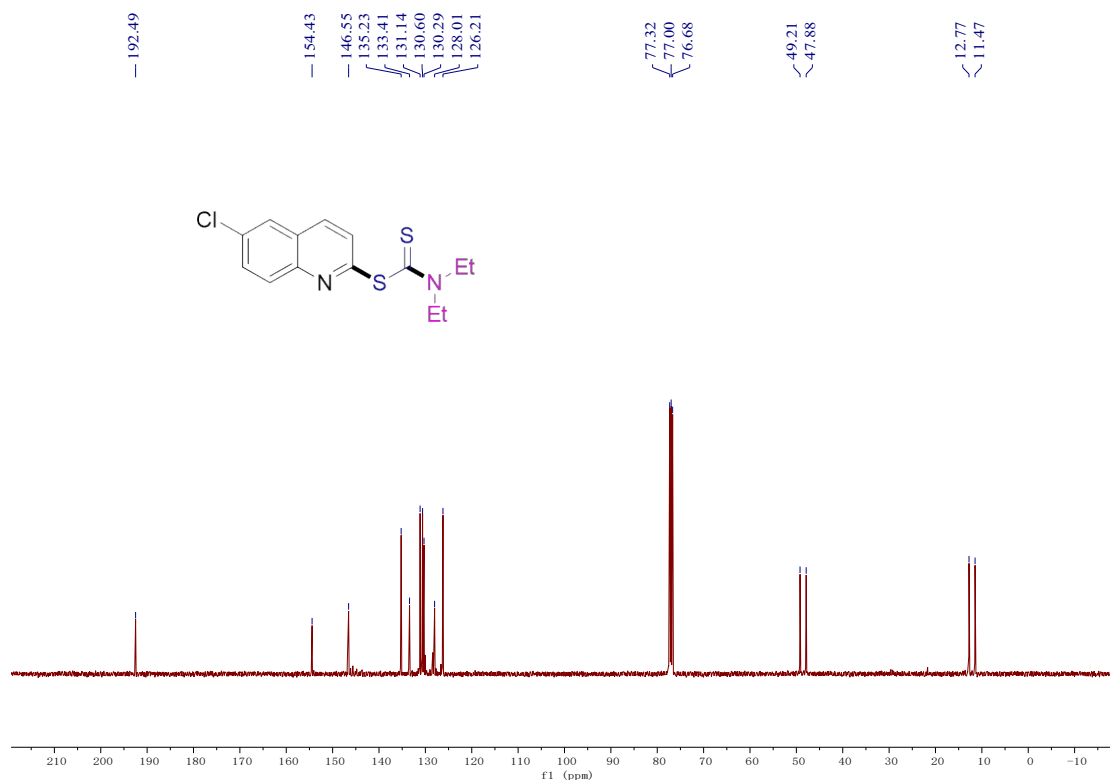

<sup>13</sup>C spectrum of compound **3ja**

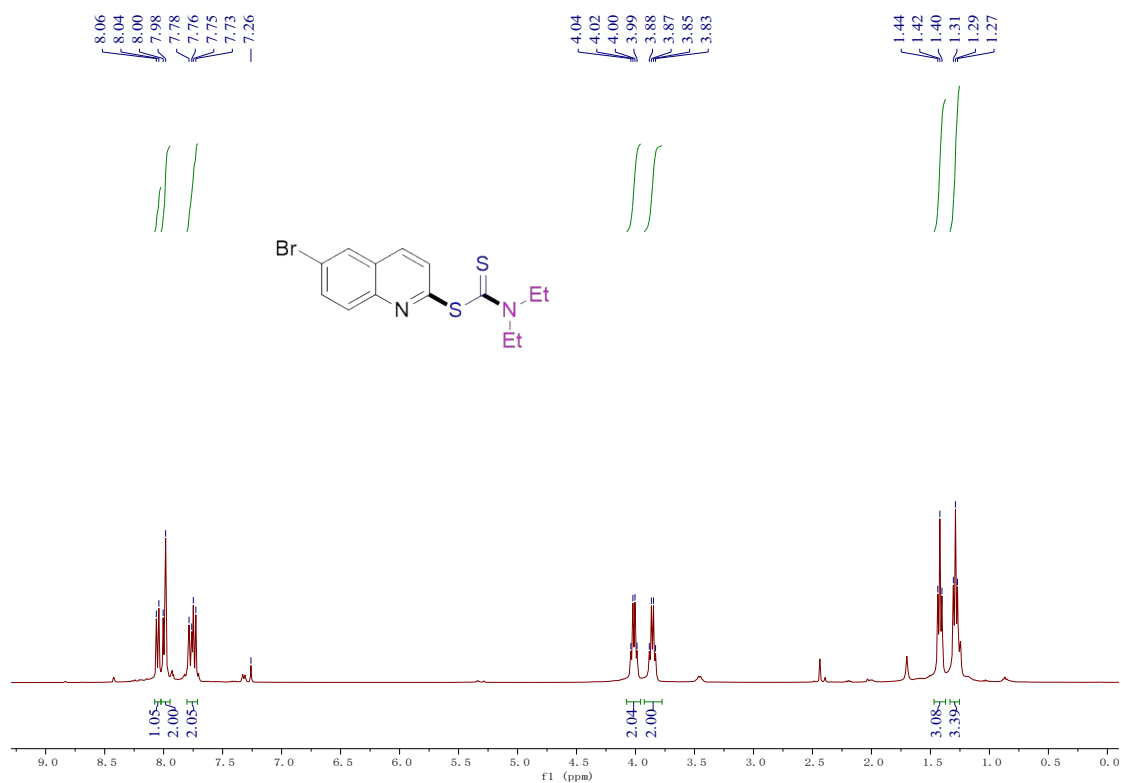

<sup>1</sup>H spectrum of compound 3ka

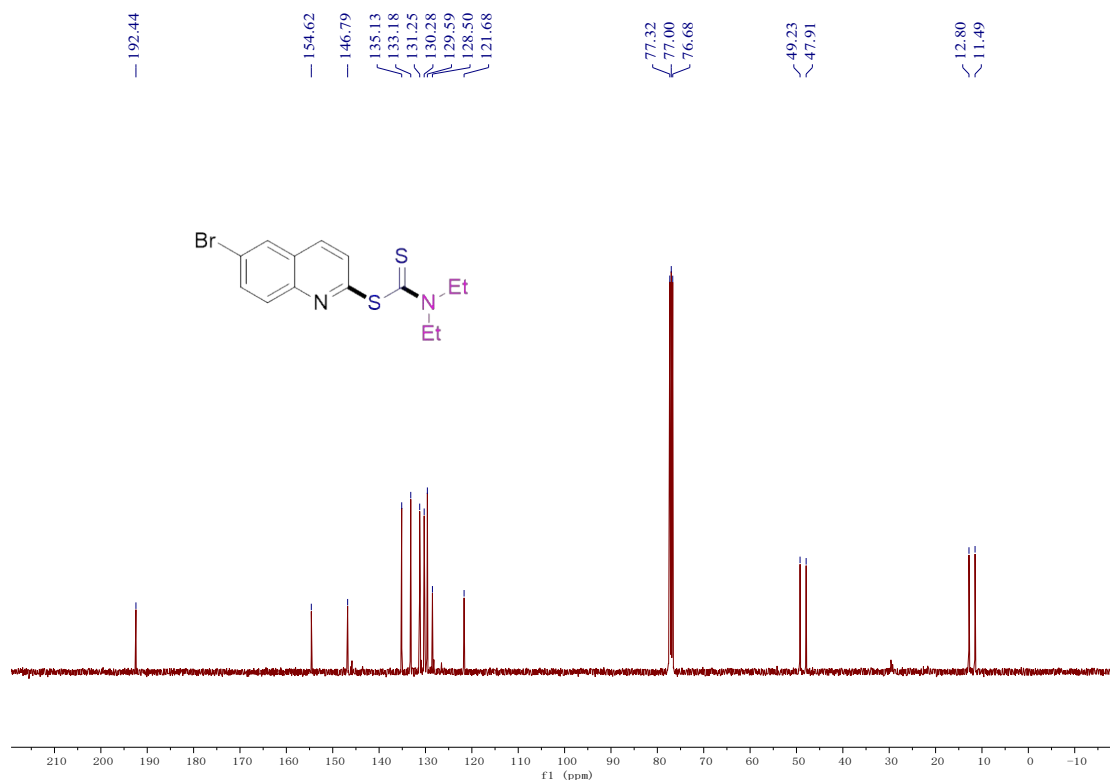

<sup>13</sup>C spectrum of compound 3ka



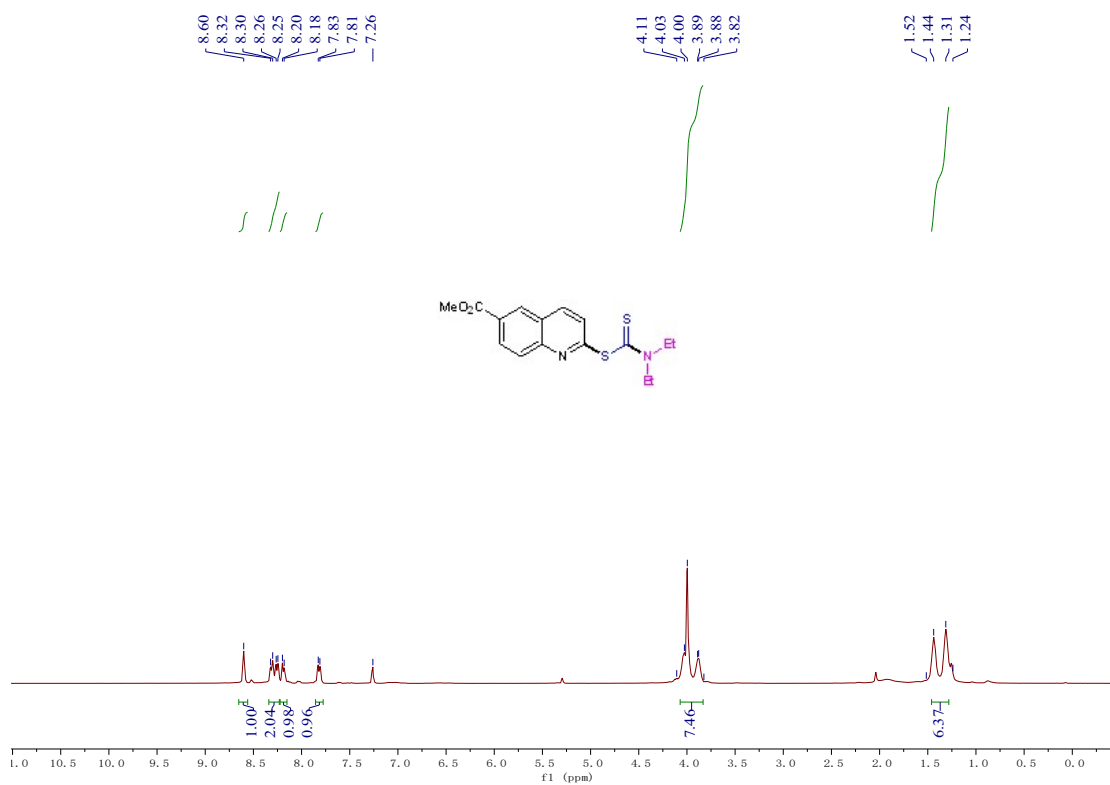

<sup>1</sup>H spectrum of compound 3la

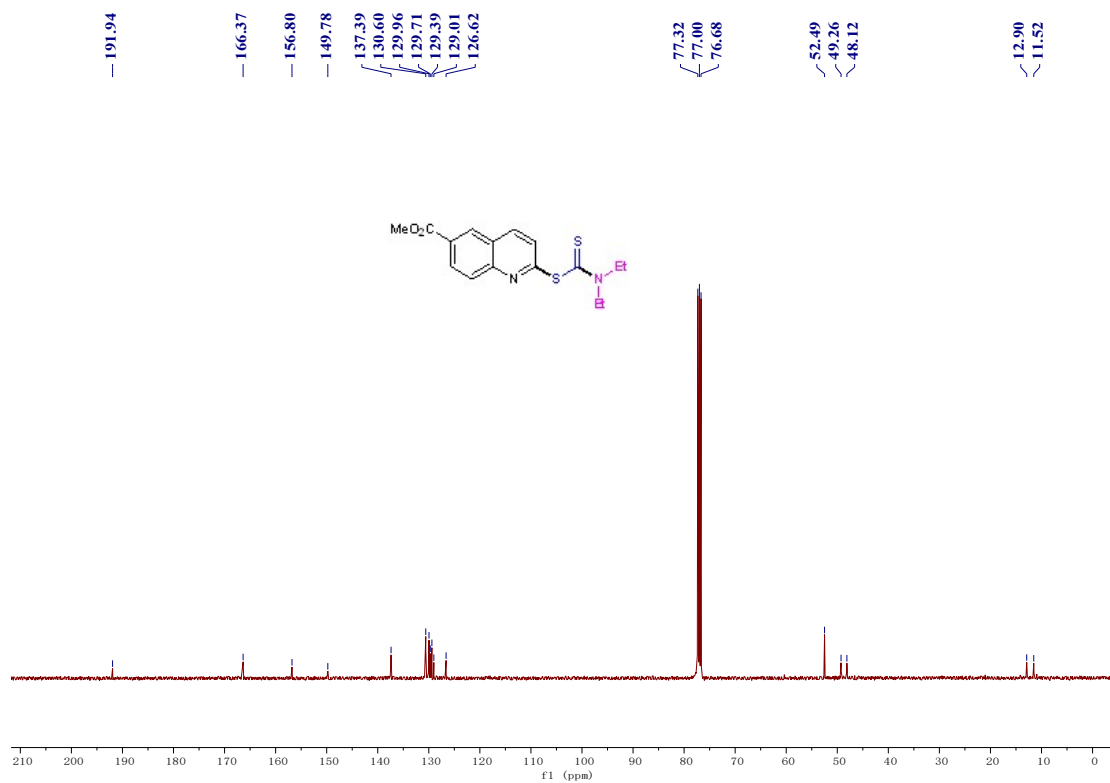

<sup>13</sup>C spectrum of compound 3la

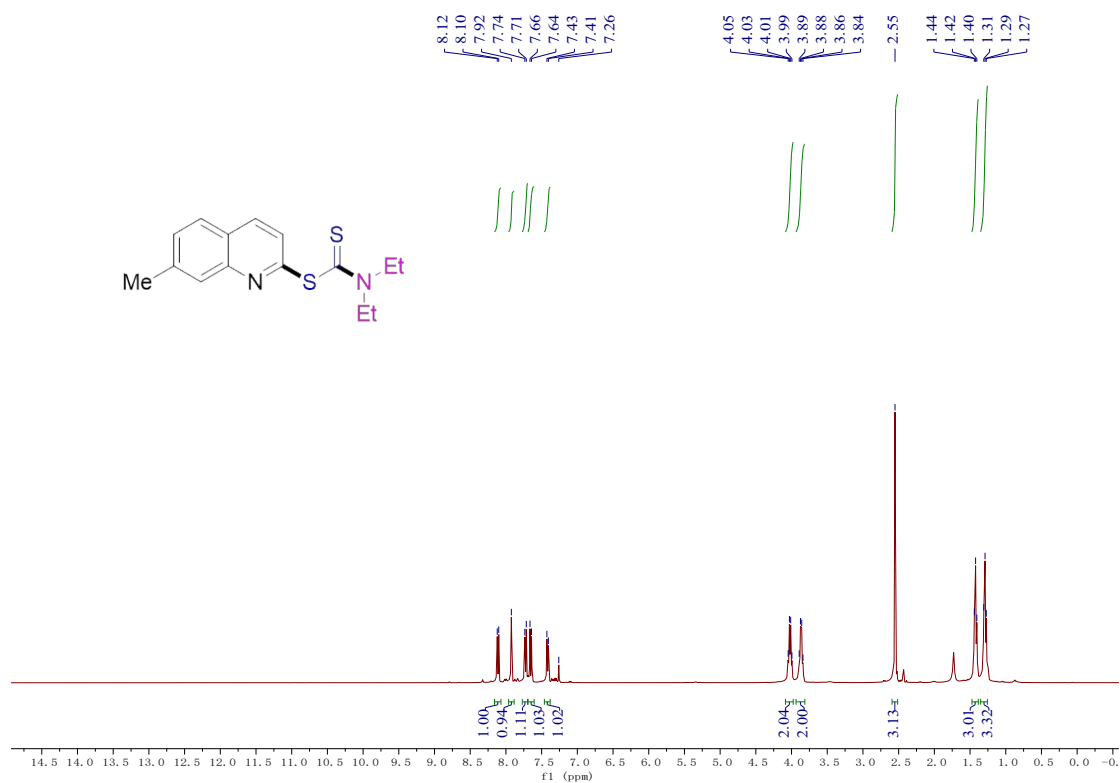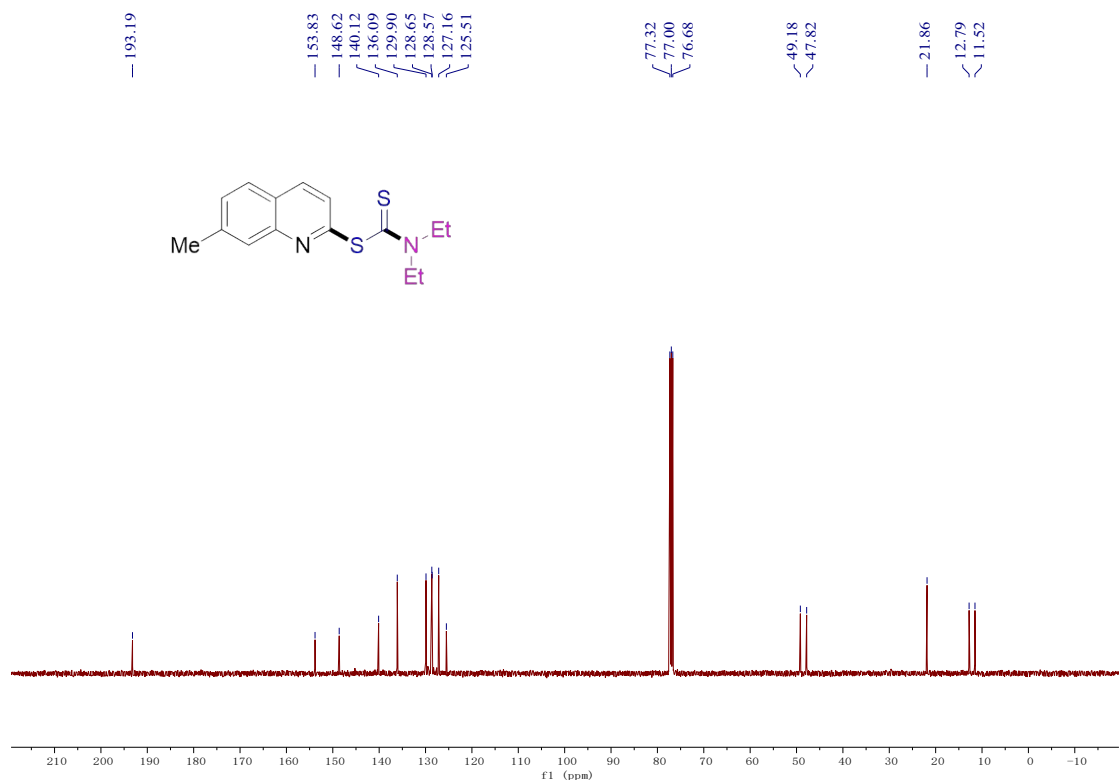

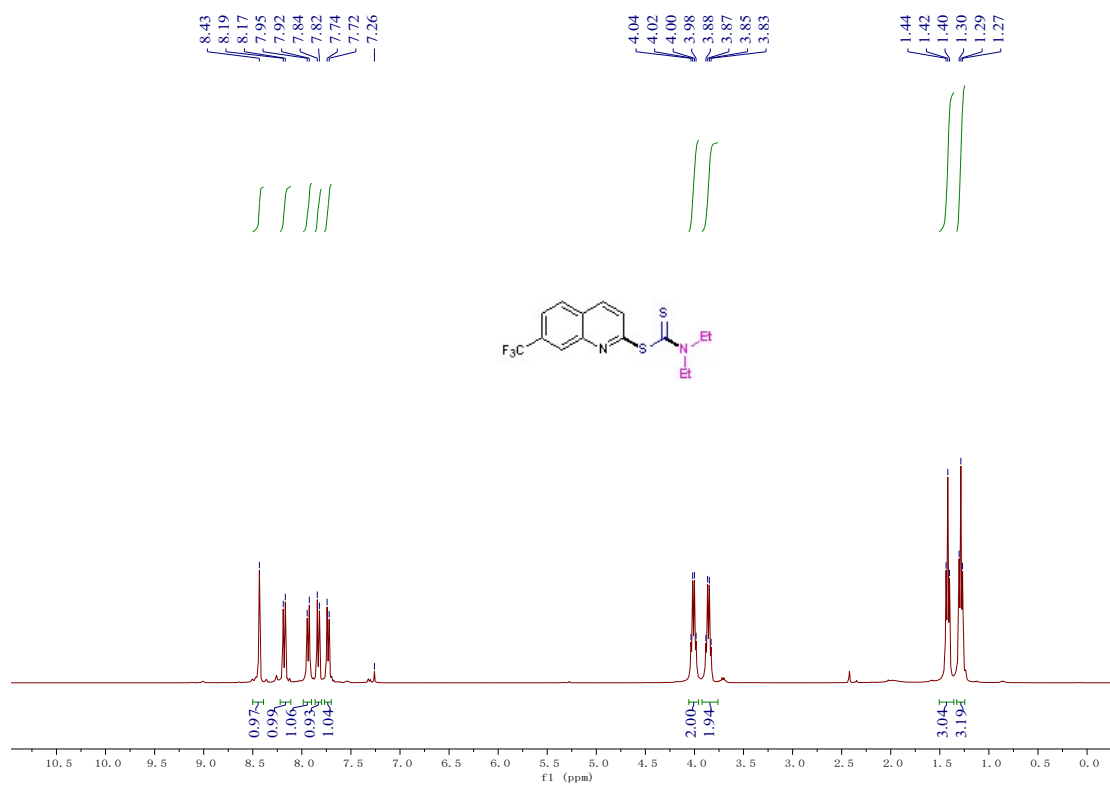

<sup>1</sup>H spectrum of compound 3na

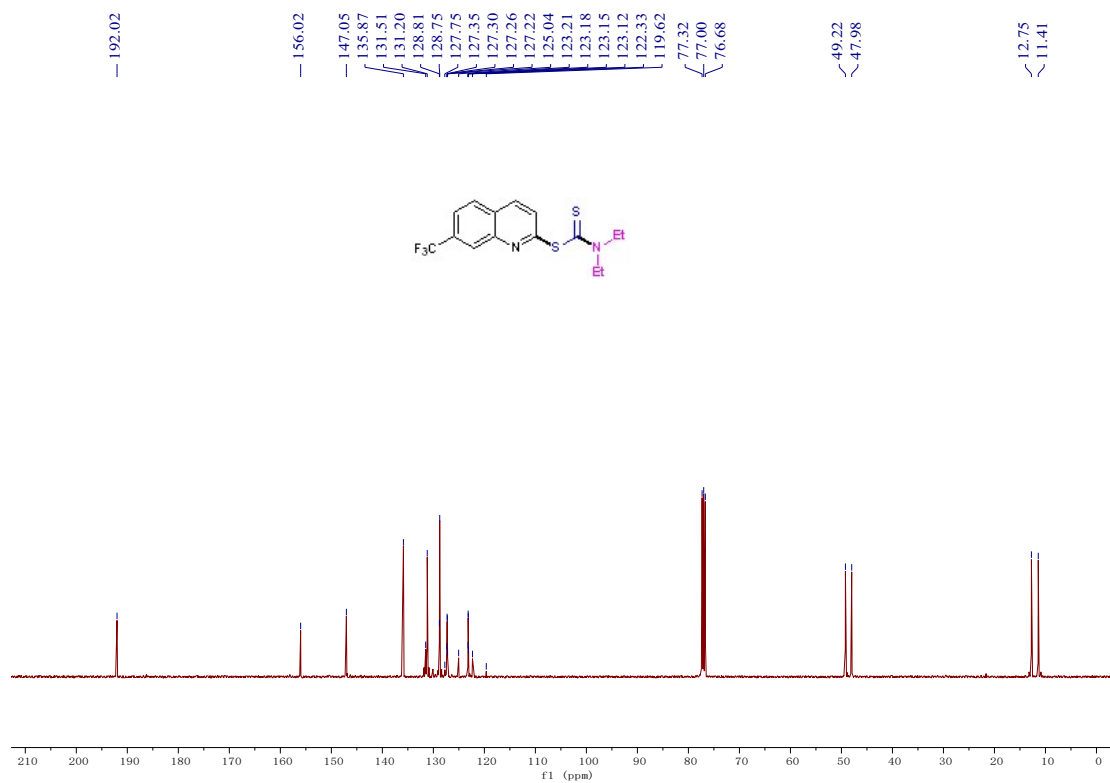

<sup>13</sup>C spectrum of compound 3na

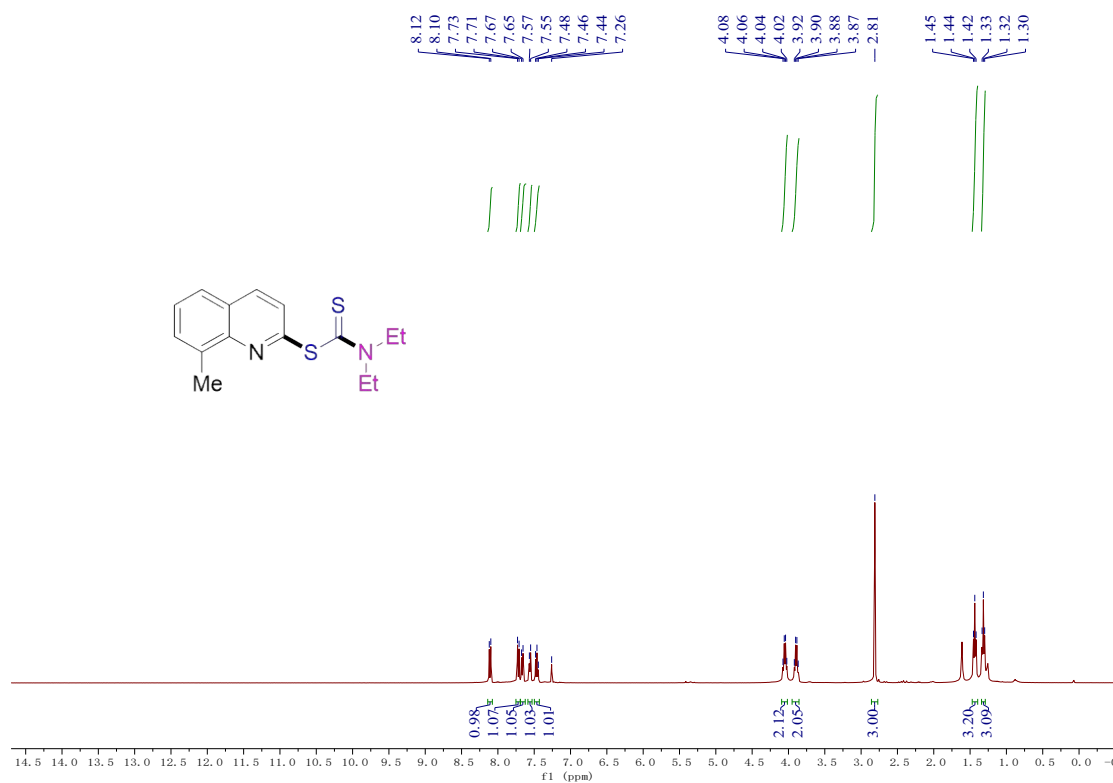

<sup>1</sup>H spectrum of compound 30a

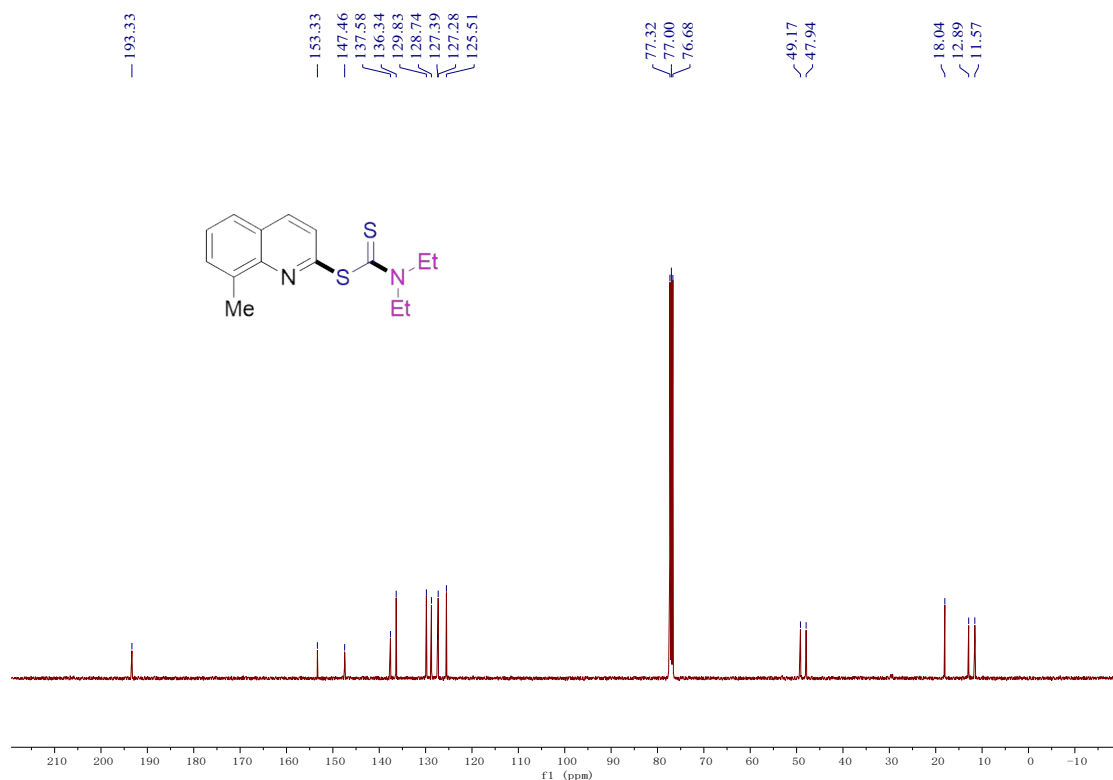

<sup>13</sup>C spectrum of compound 30a

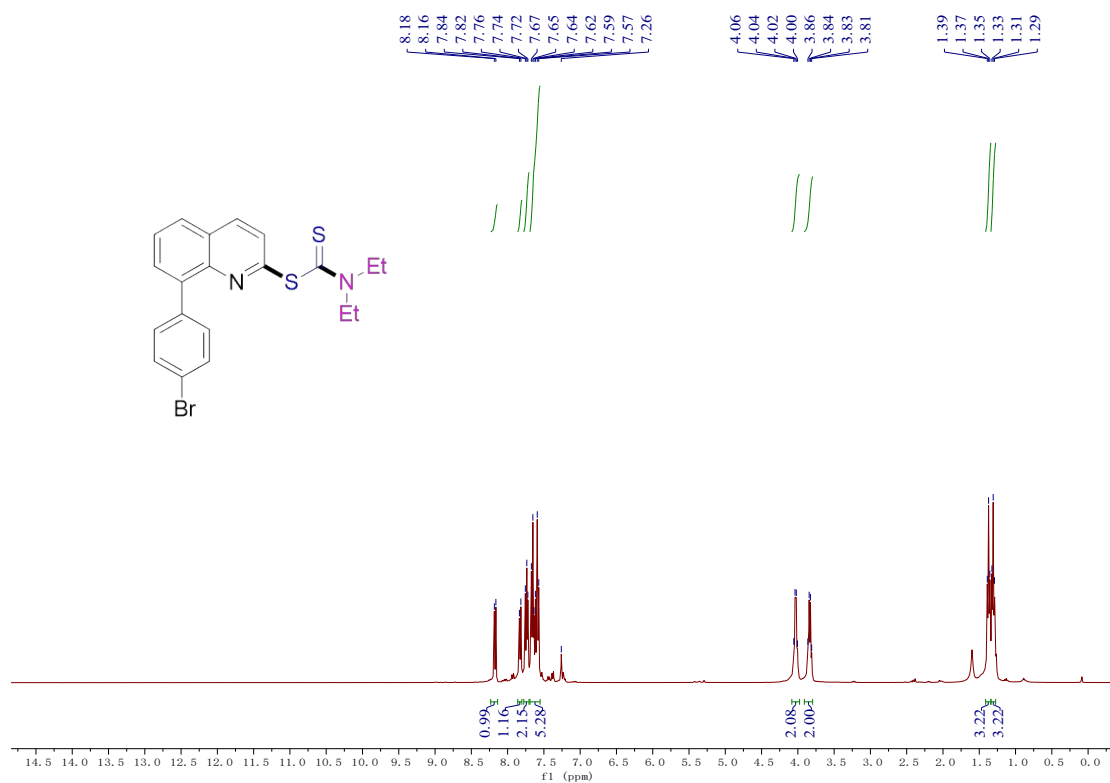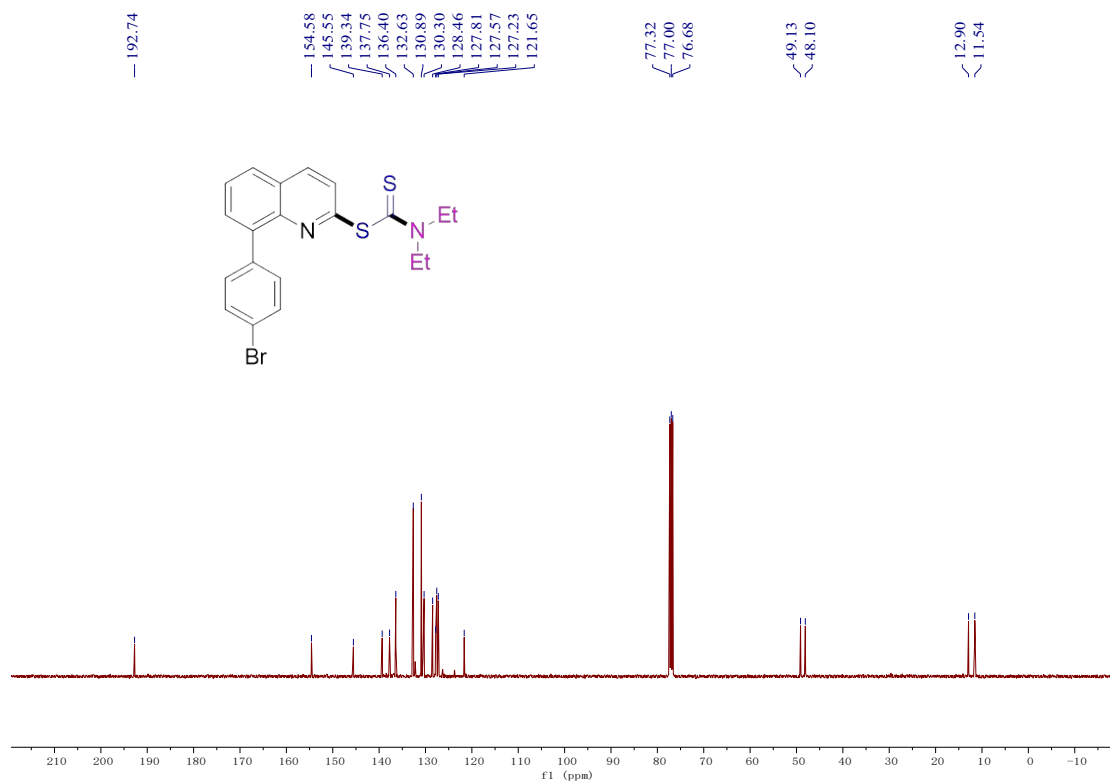

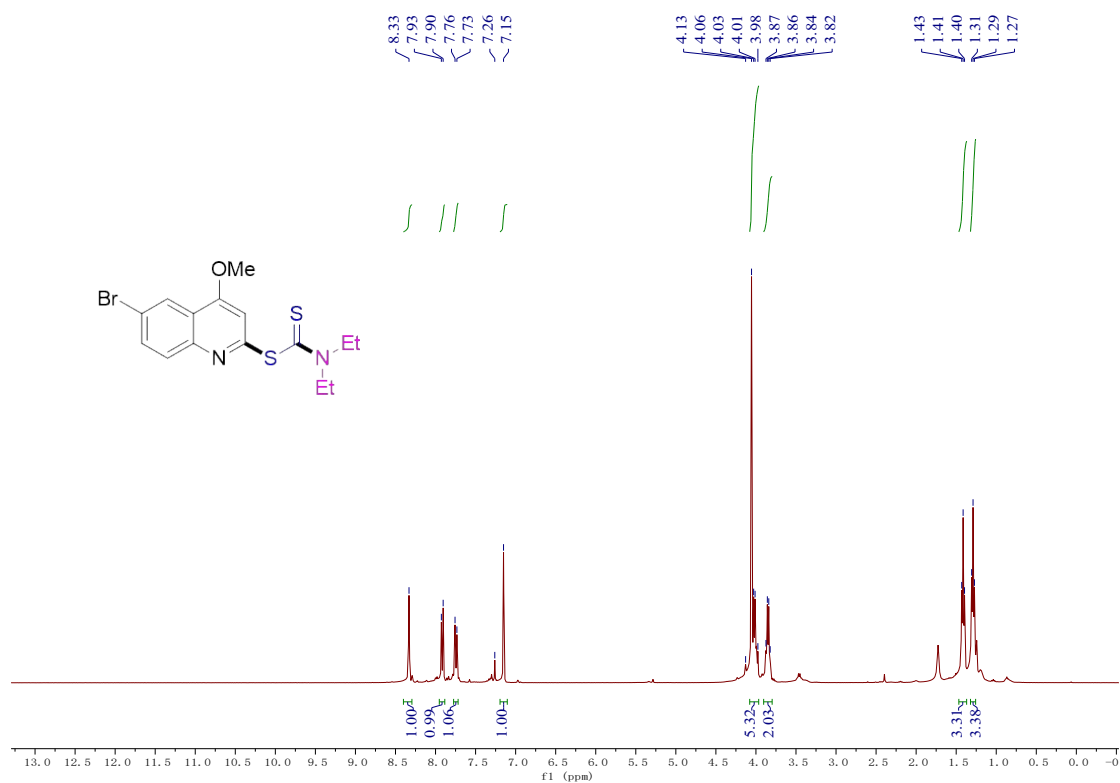

<sup>1</sup>H spectrum of compound 3qa

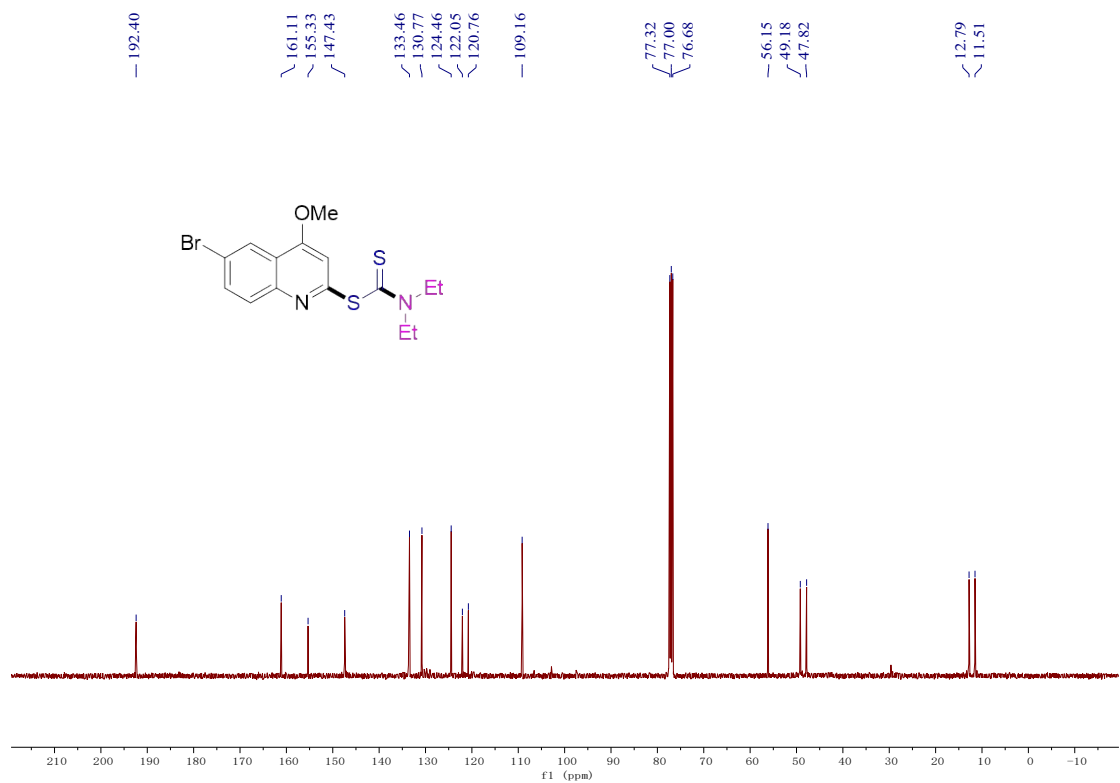

<sup>13</sup>C spectrum of compound 3qa

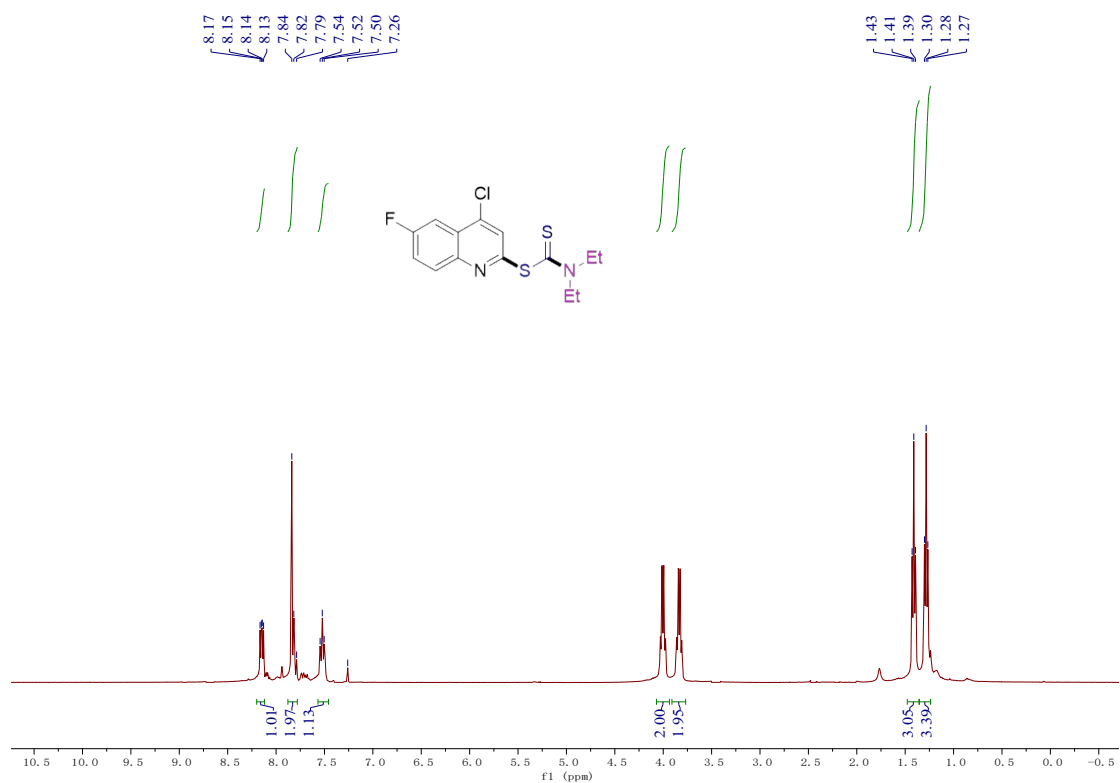

<sup>1</sup>H spectrum of compound 3ra

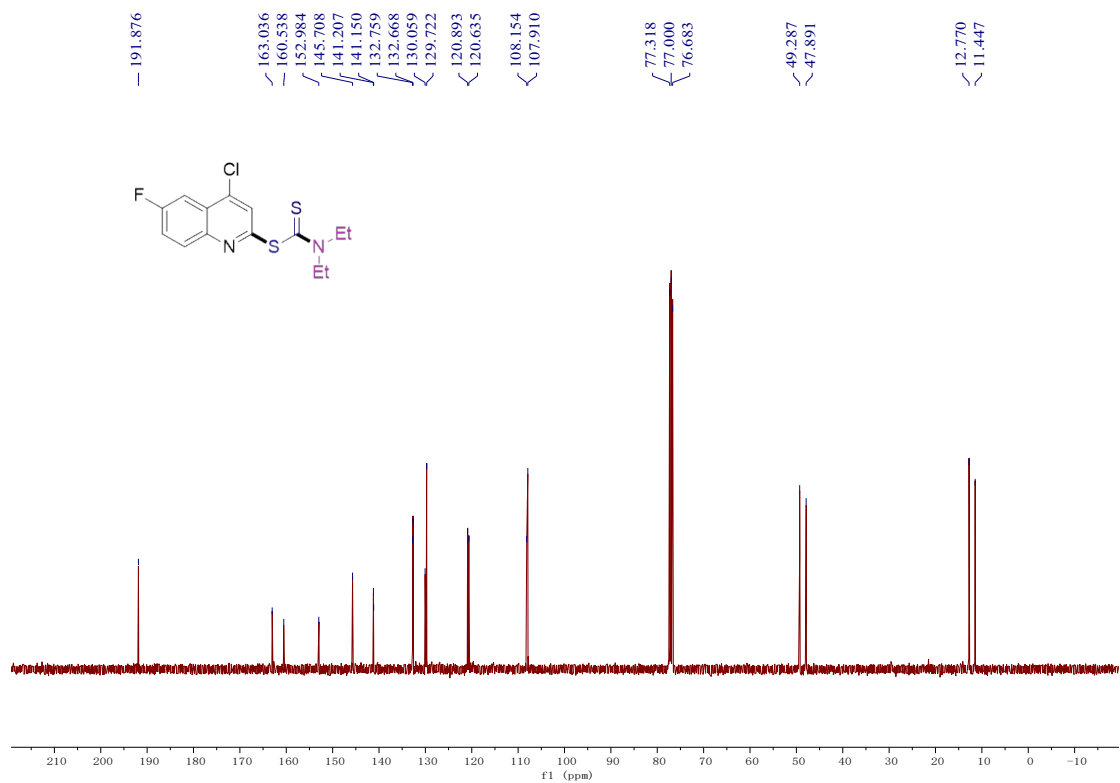

<sup>13</sup>C spectrum of compound 3ra

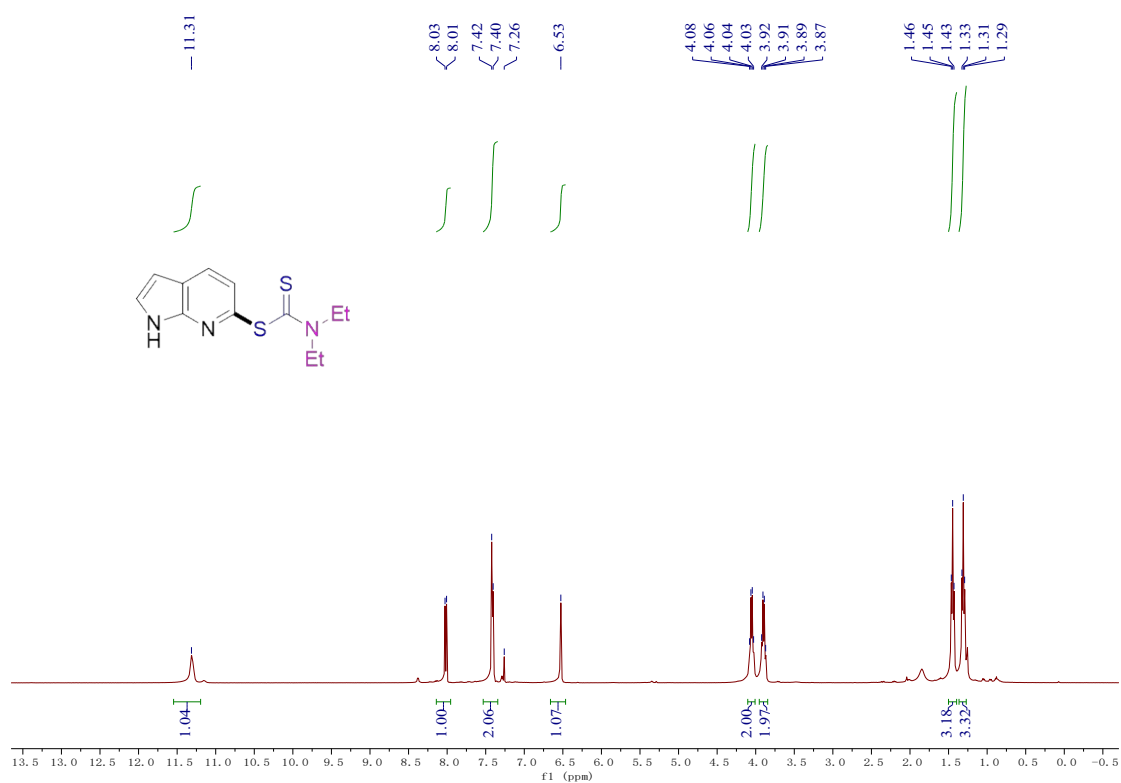

<sup>1</sup>H spectrum of compound 3sa

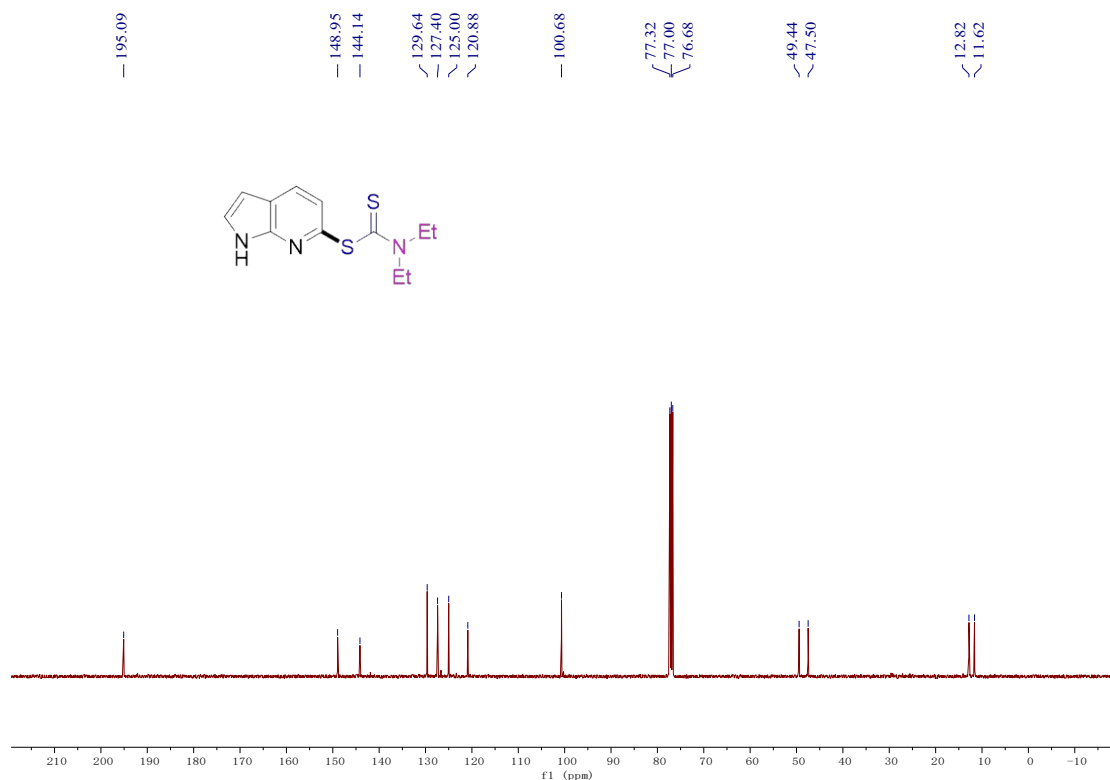

<sup>13</sup>C spectrum of compound 3sa



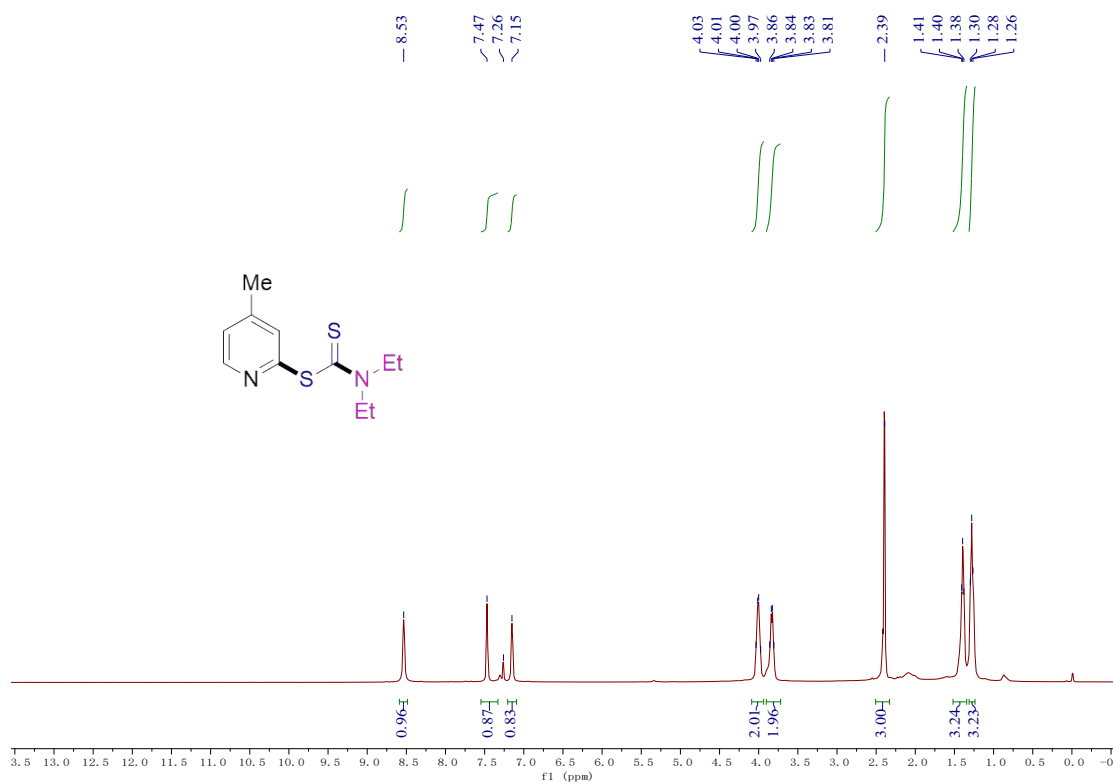

<sup>1</sup>H spectrum of compound 3ta

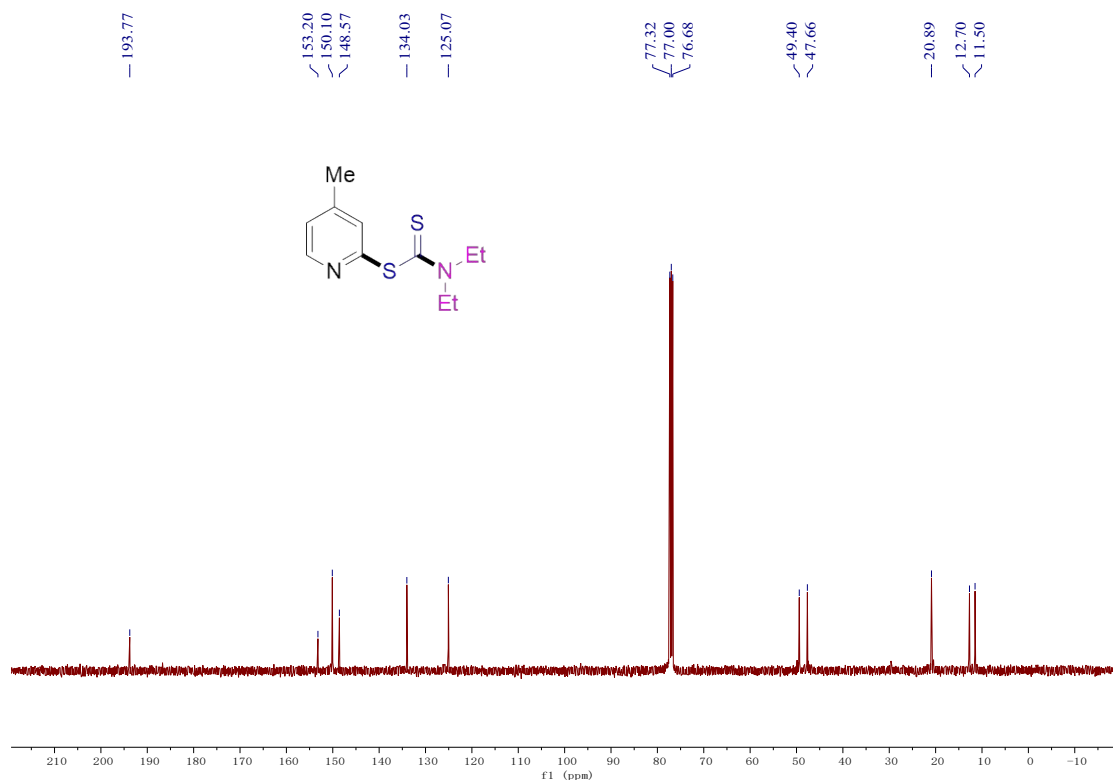

<sup>13</sup>C spectrum of compound 3ta

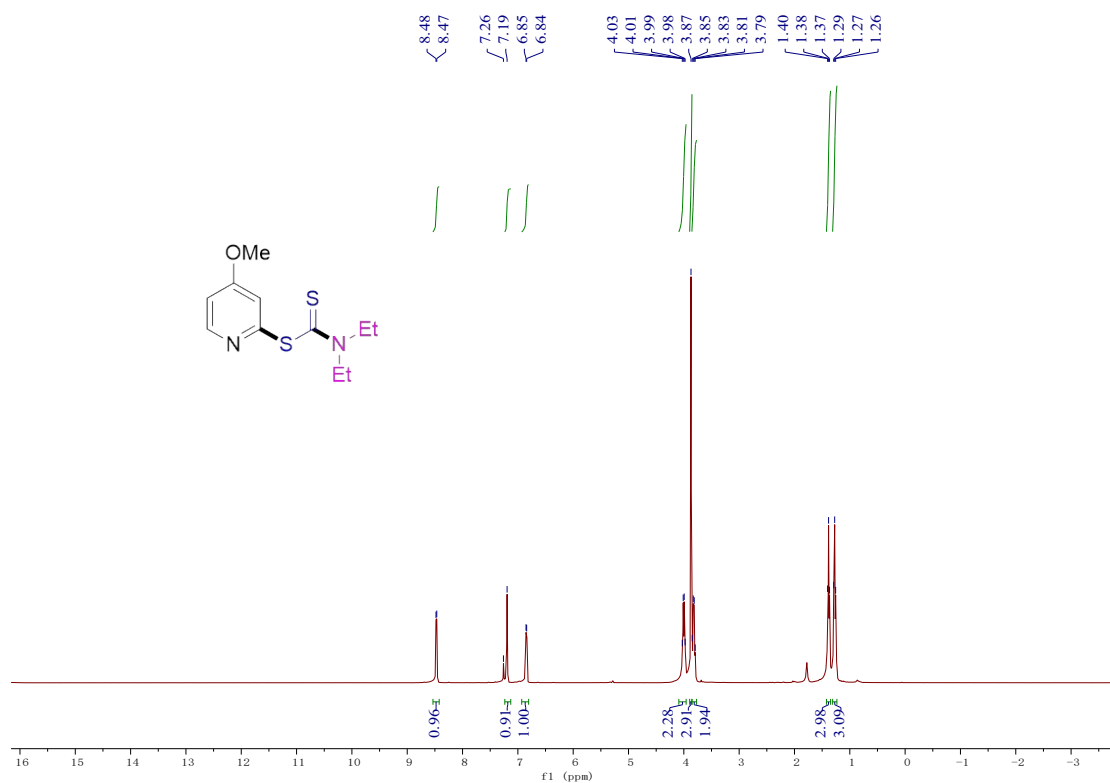

<sup>1</sup>H spectrum of compound 3ua

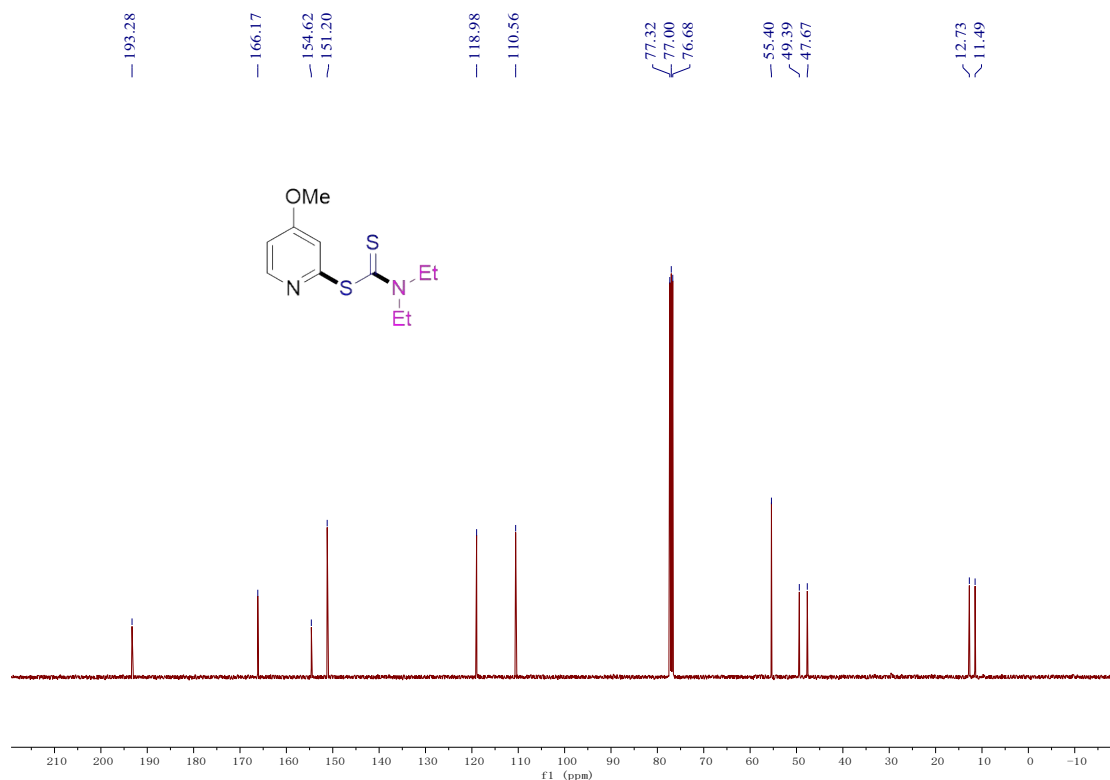

<sup>13</sup>C spectrum of compound 3ua

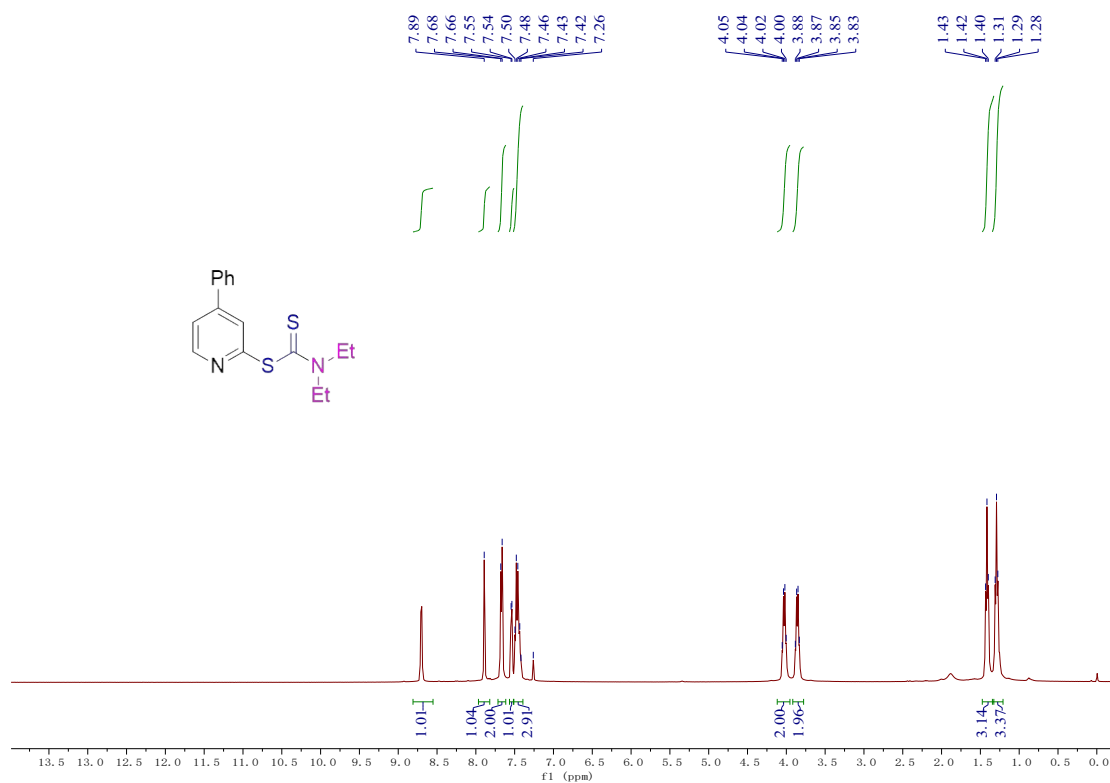

<sup>1</sup>H spectrum of compound **3va**

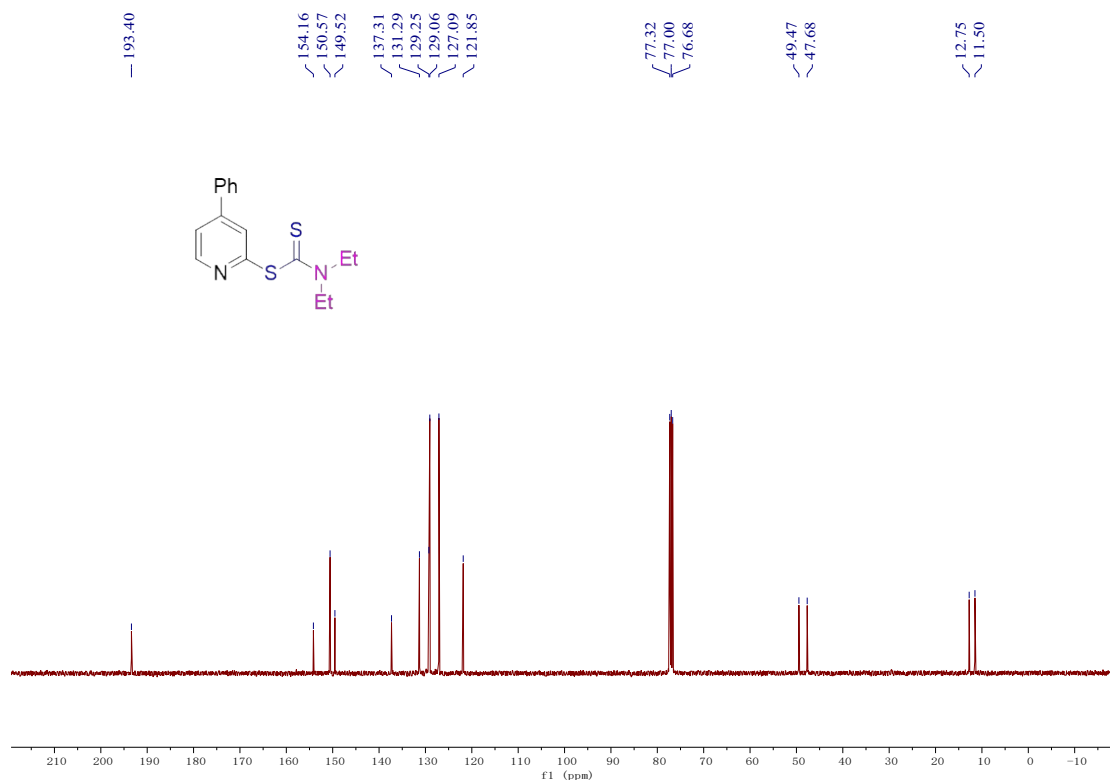

<sup>13</sup>C spectrum of compound **3va**

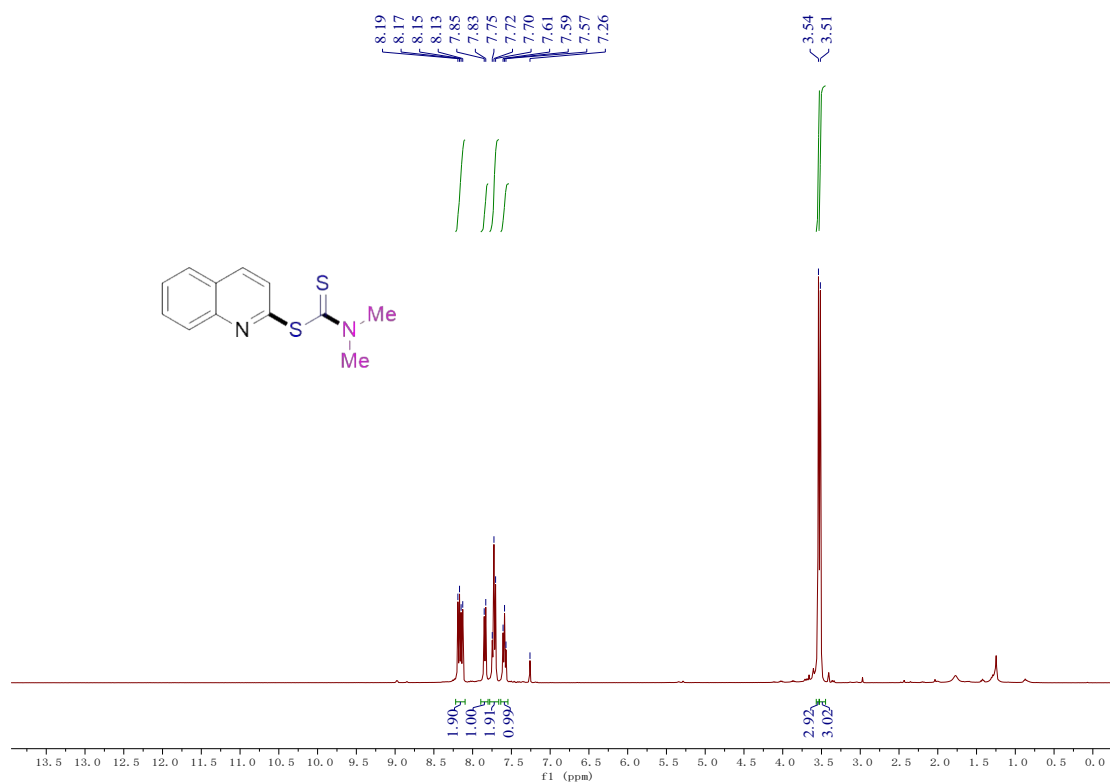

<sup>1</sup>H spectrum of compound 3ab

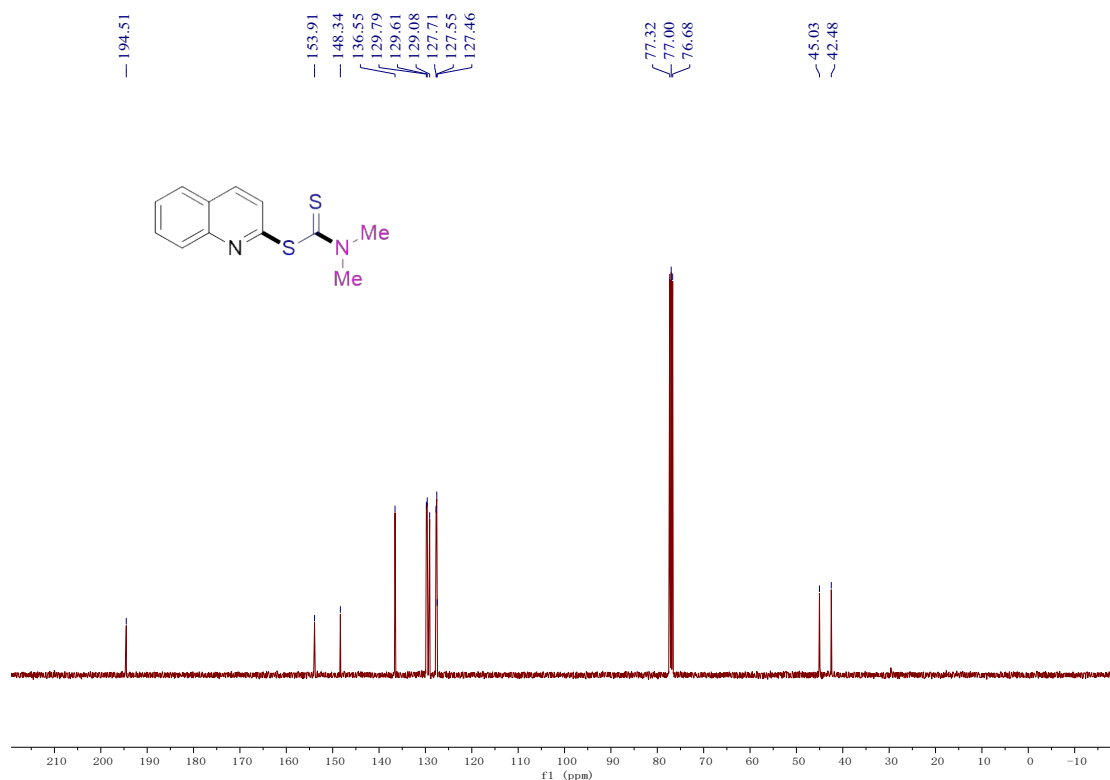

<sup>13</sup>C spectrum of compound 3ab

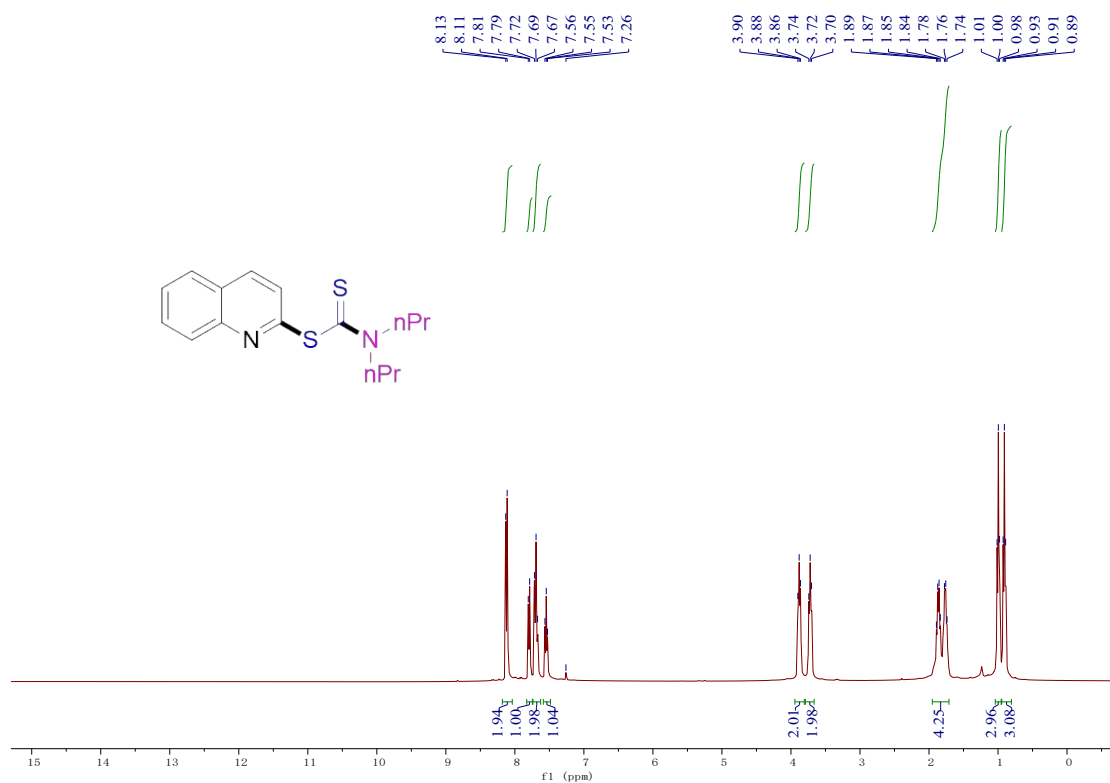

<sup>1</sup>H spectrum of compound **3ac**

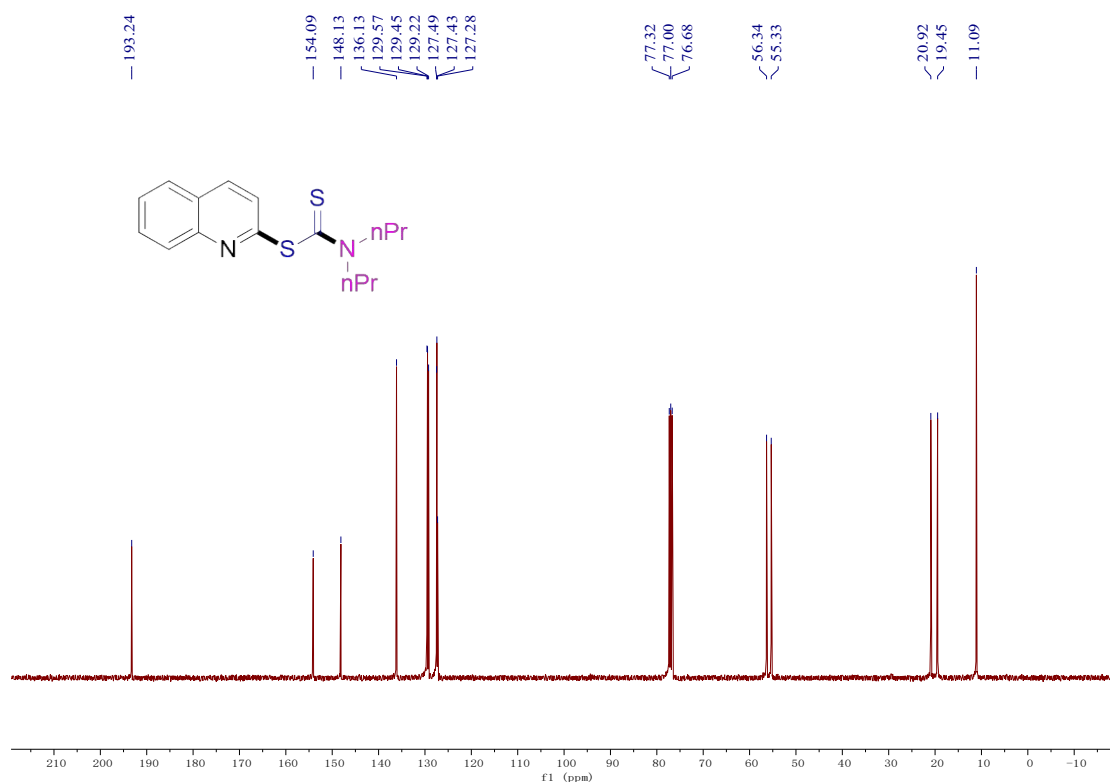

<sup>13</sup>C spectrum of compound **3ac**

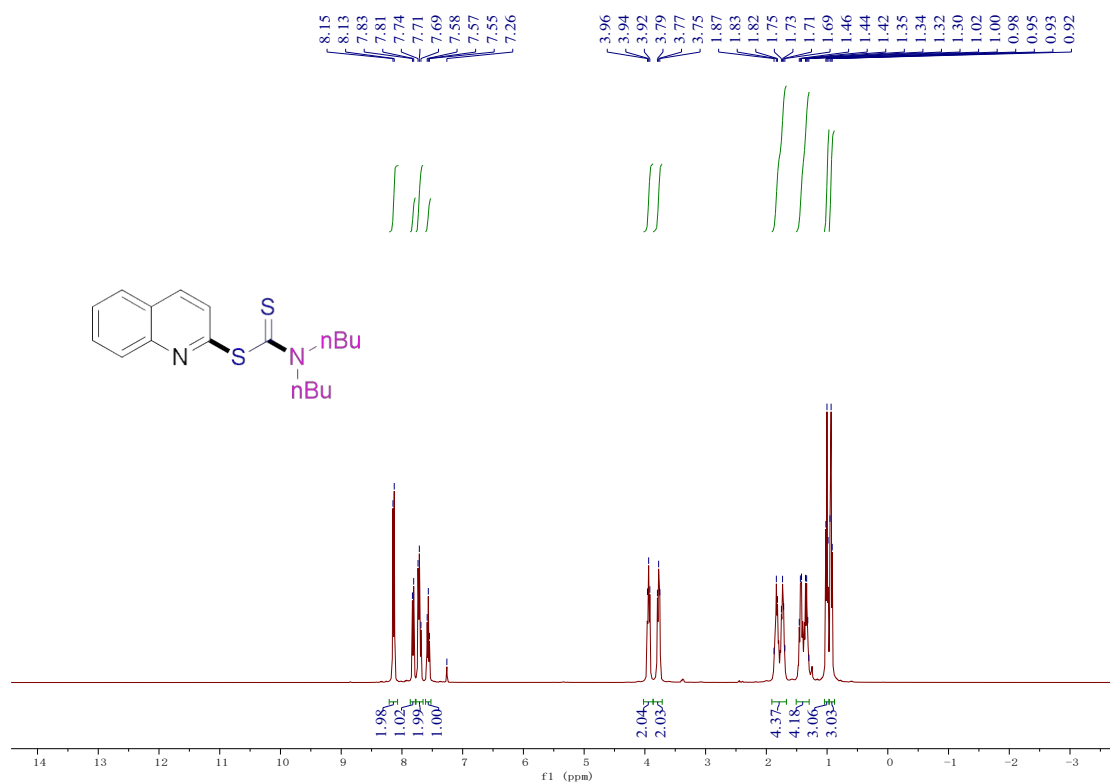

<sup>1</sup>H spectrum of compound 3ad

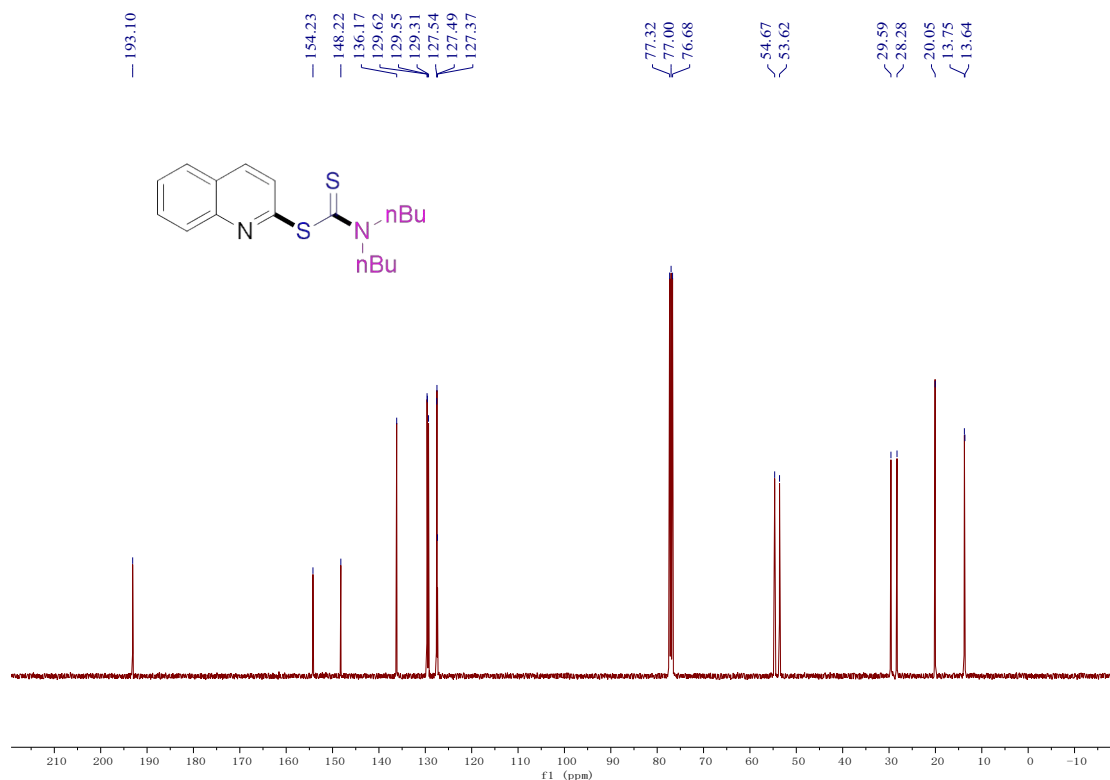

<sup>13</sup>C spectrum of compound 3ad

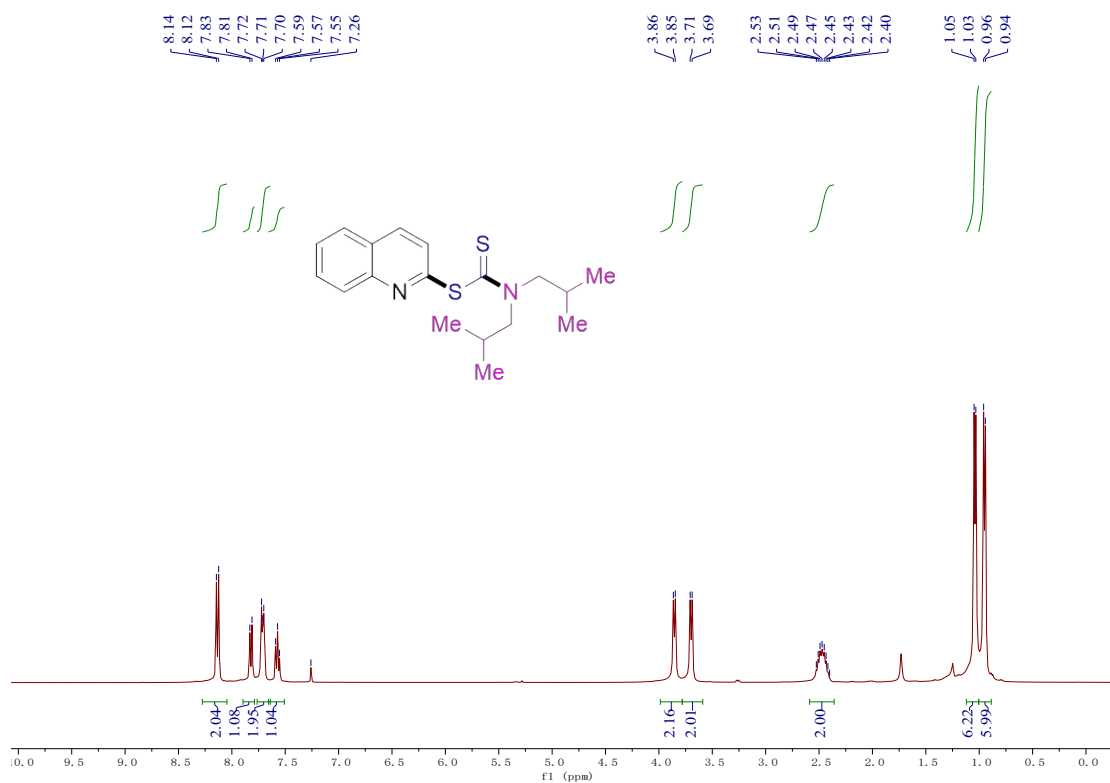

<sup>1</sup>H spectrum of compound 3ae

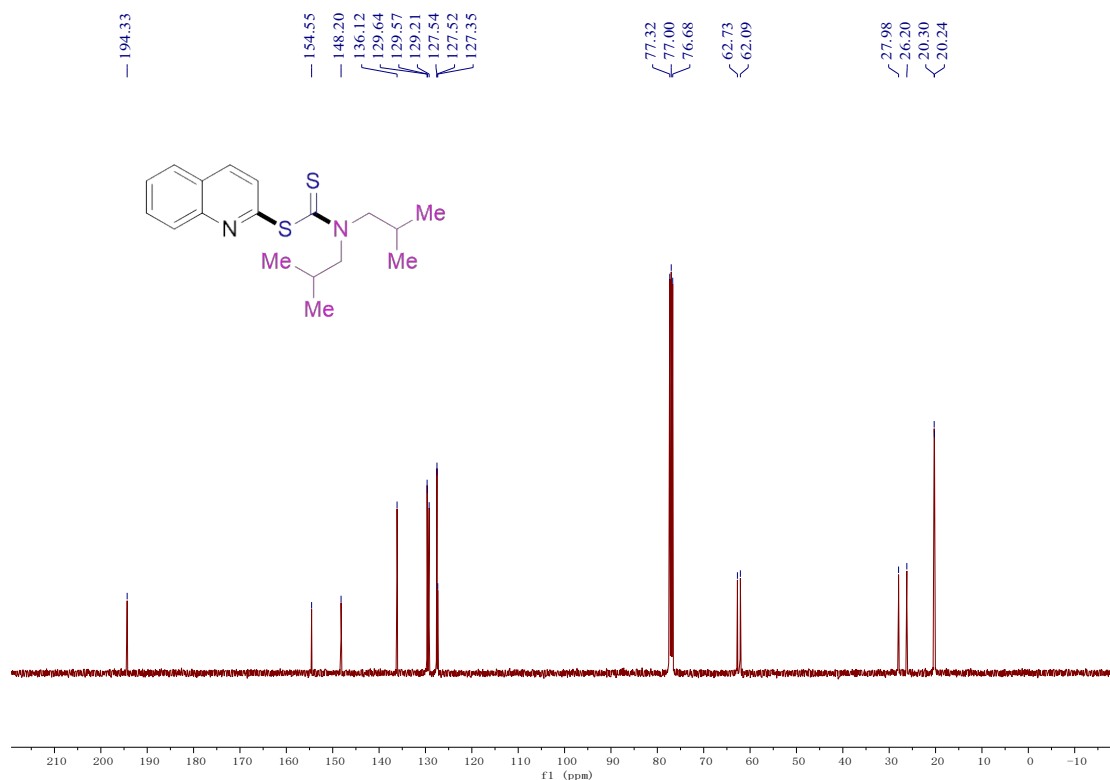

<sup>13</sup>C spectrum of compound 3ae

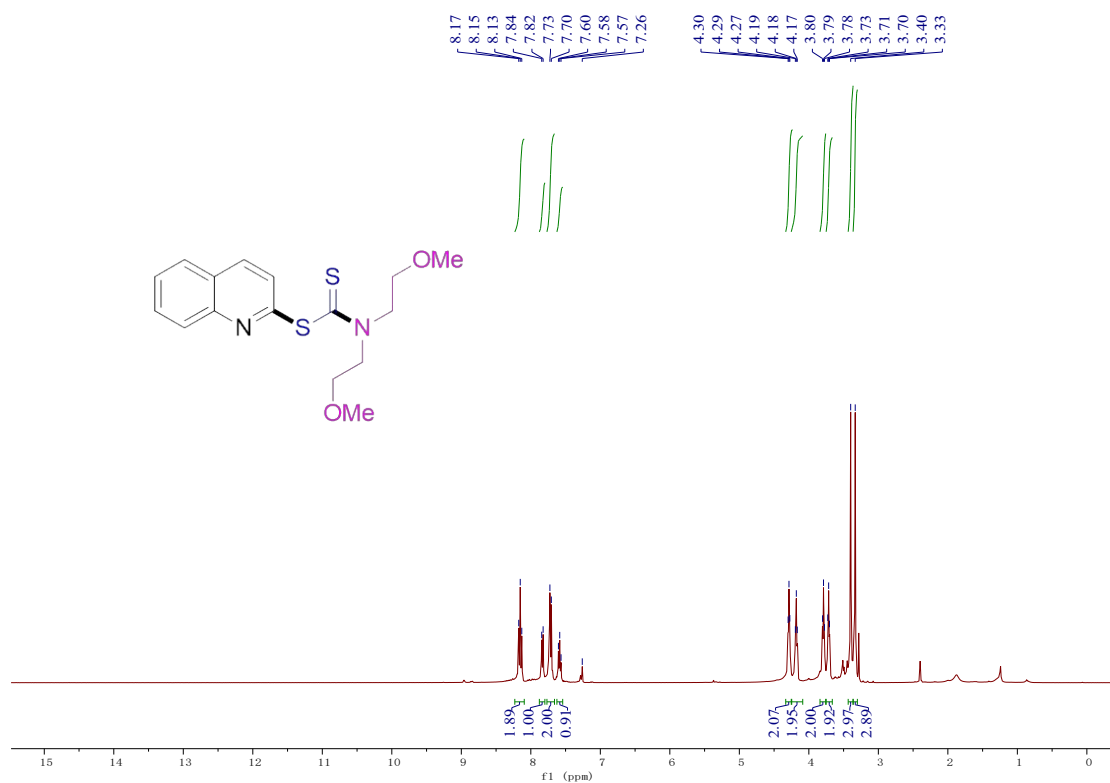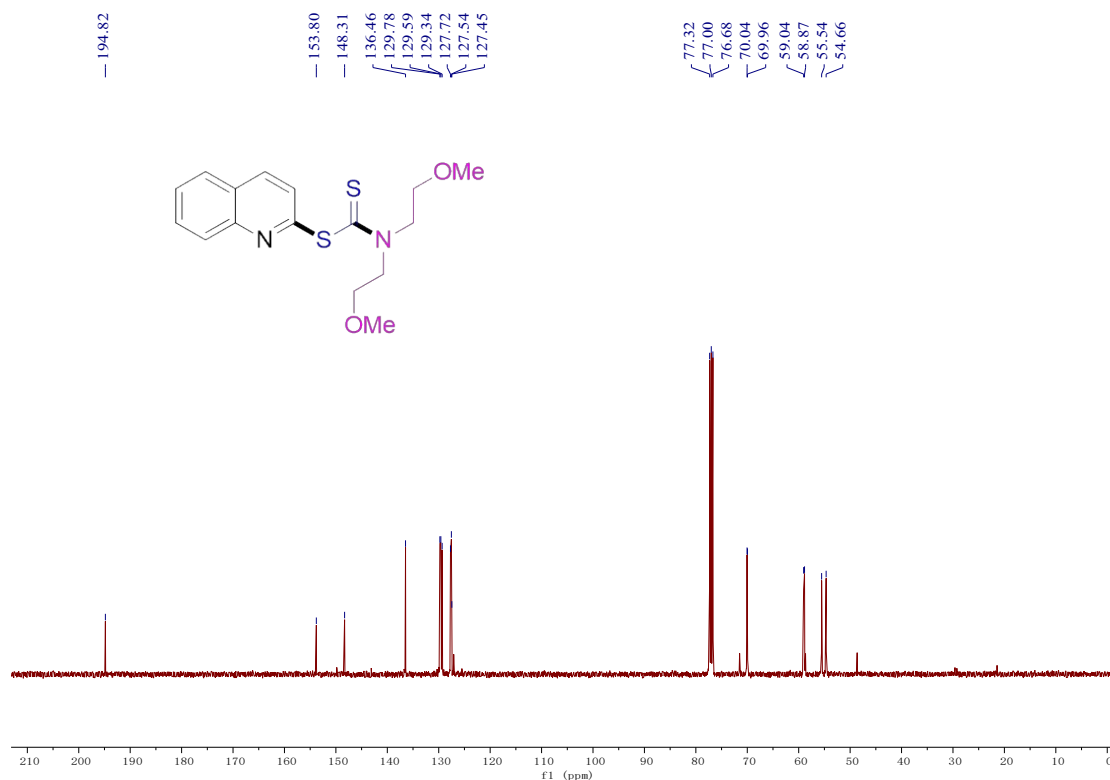



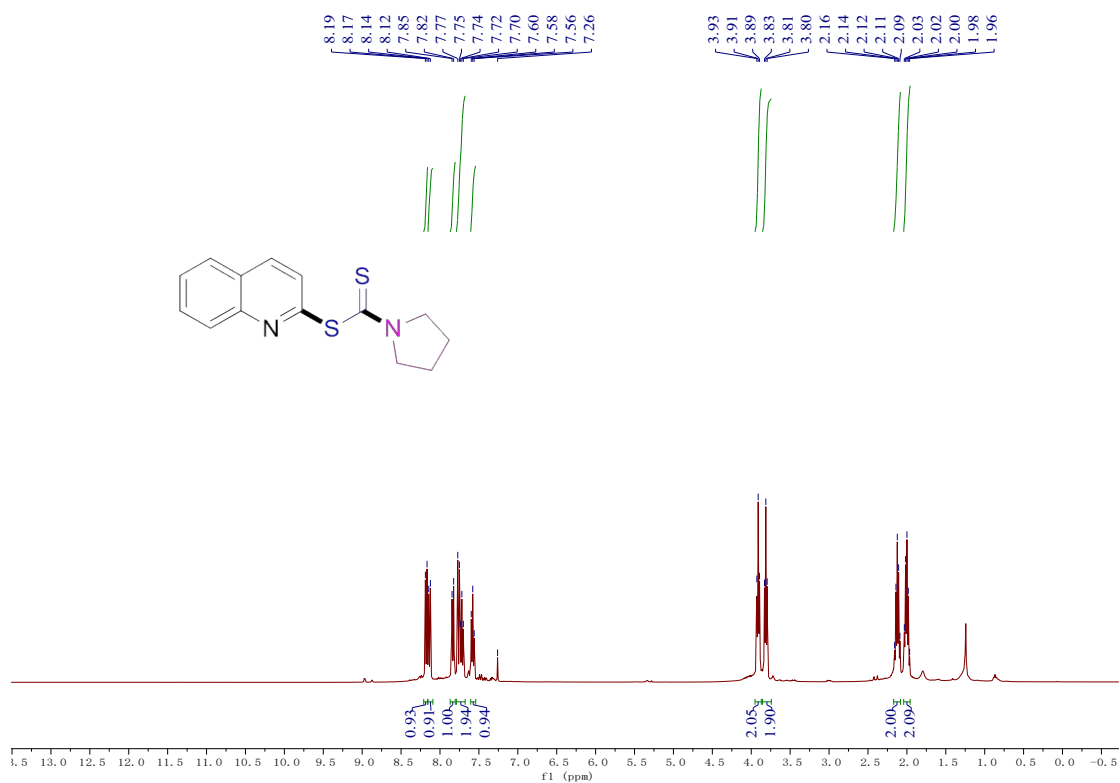

<sup>1</sup>H spectrum of compound **3ag**

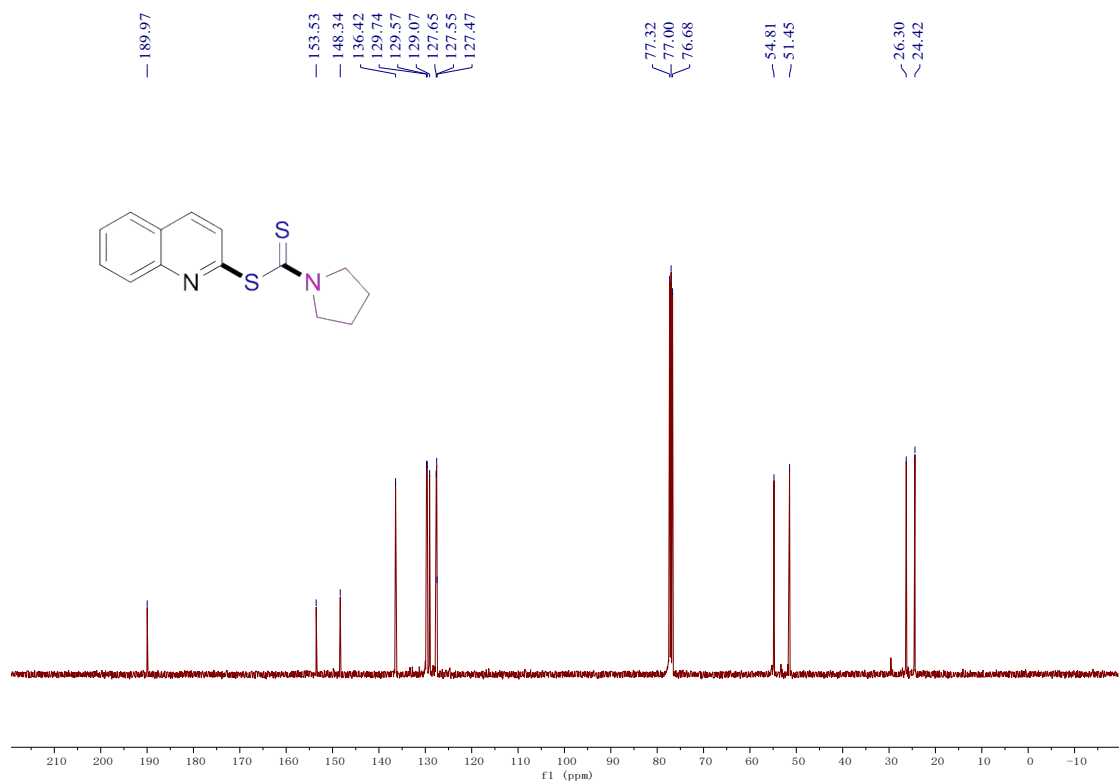

<sup>13</sup>C spectrum of compound **3ag**

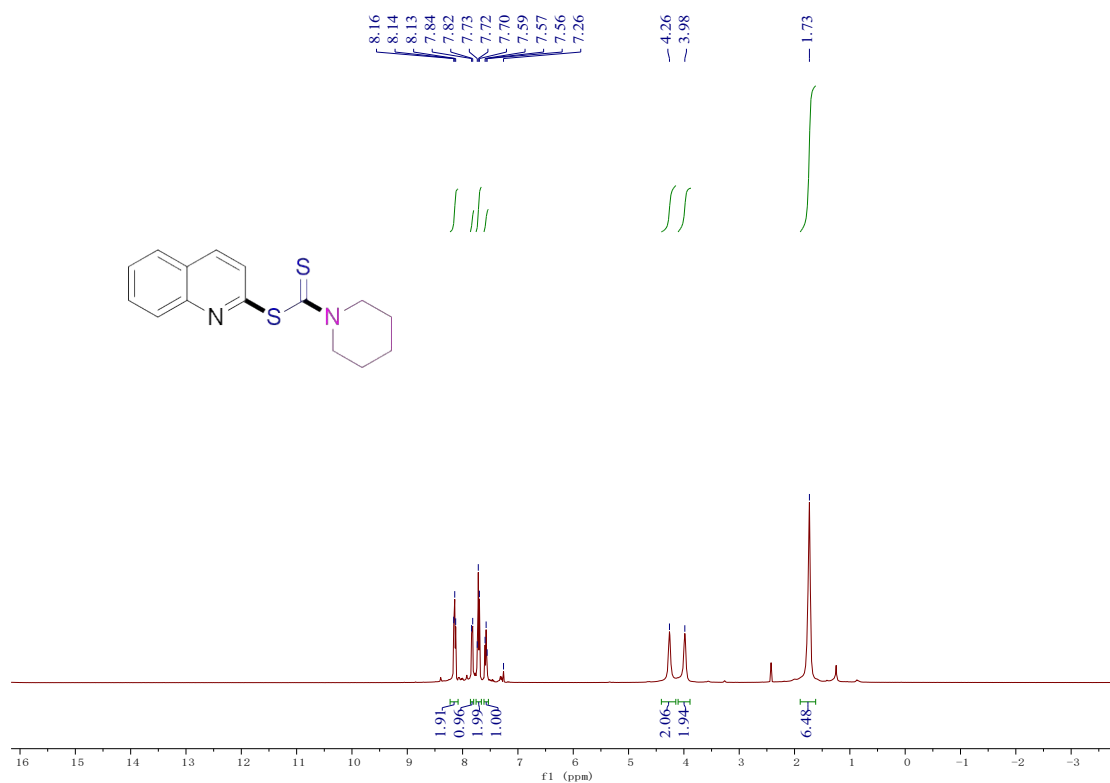

<sup>1</sup>H spectrum of compound **3ah**

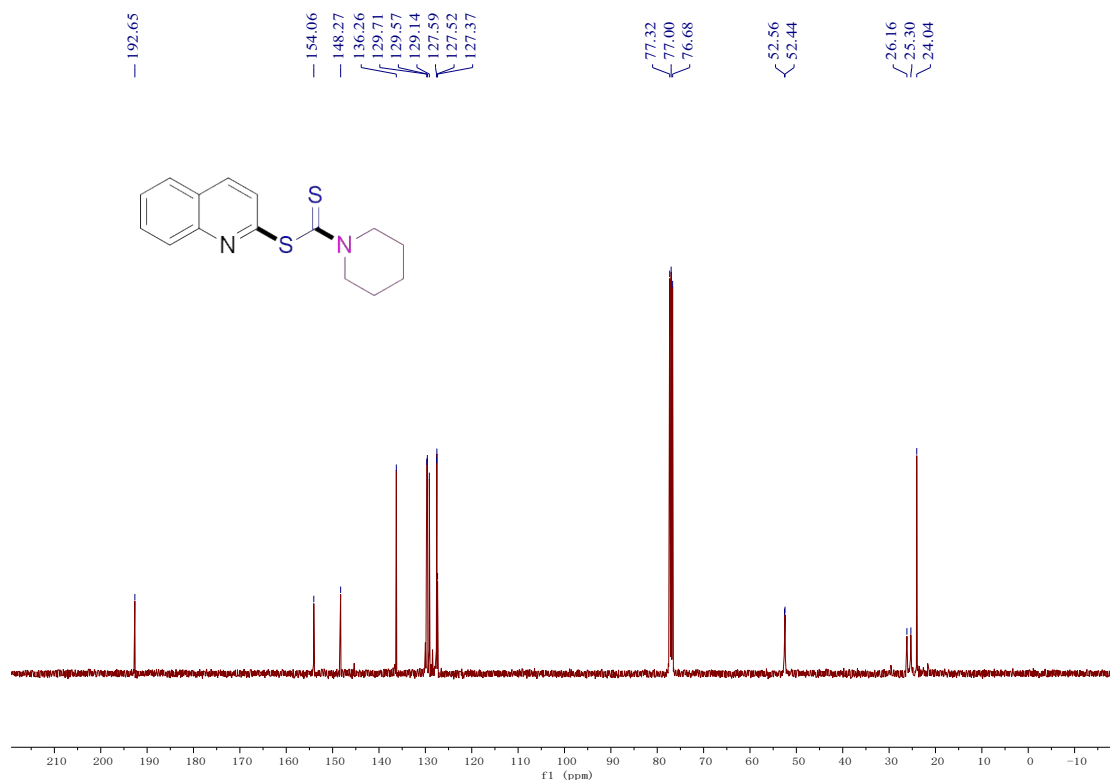

<sup>13</sup>C spectrum of compound **3ah**

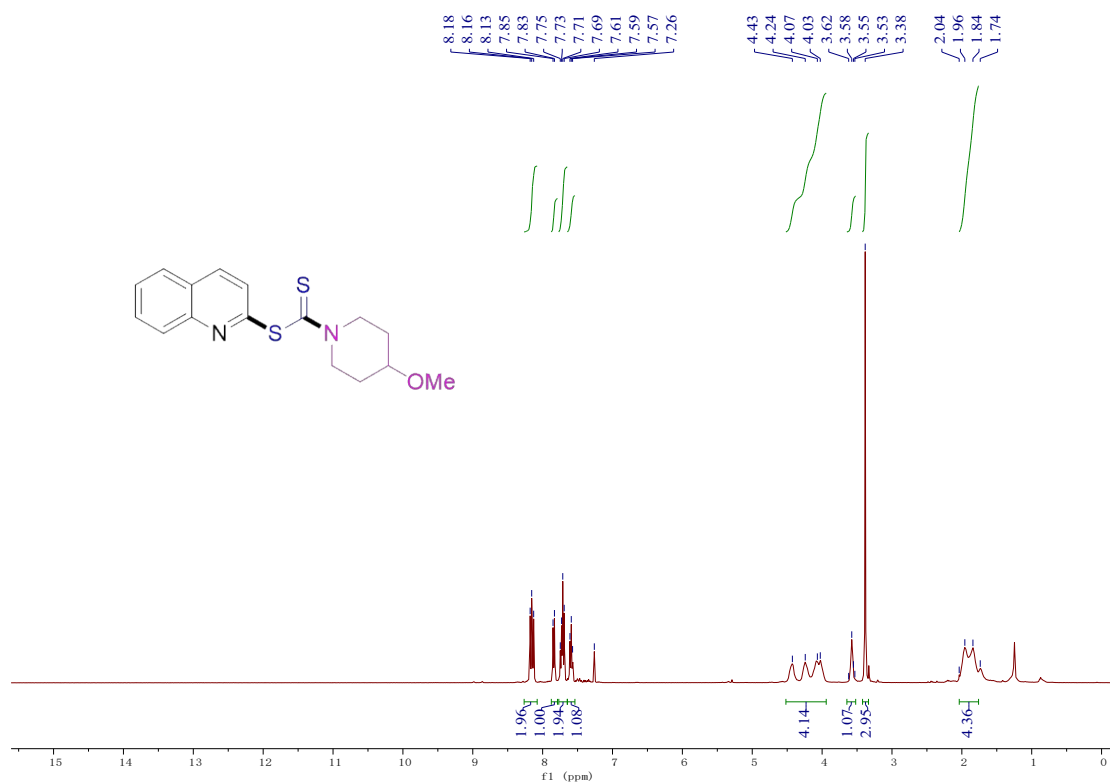

<sup>1</sup>H spectrum of compound 3ai

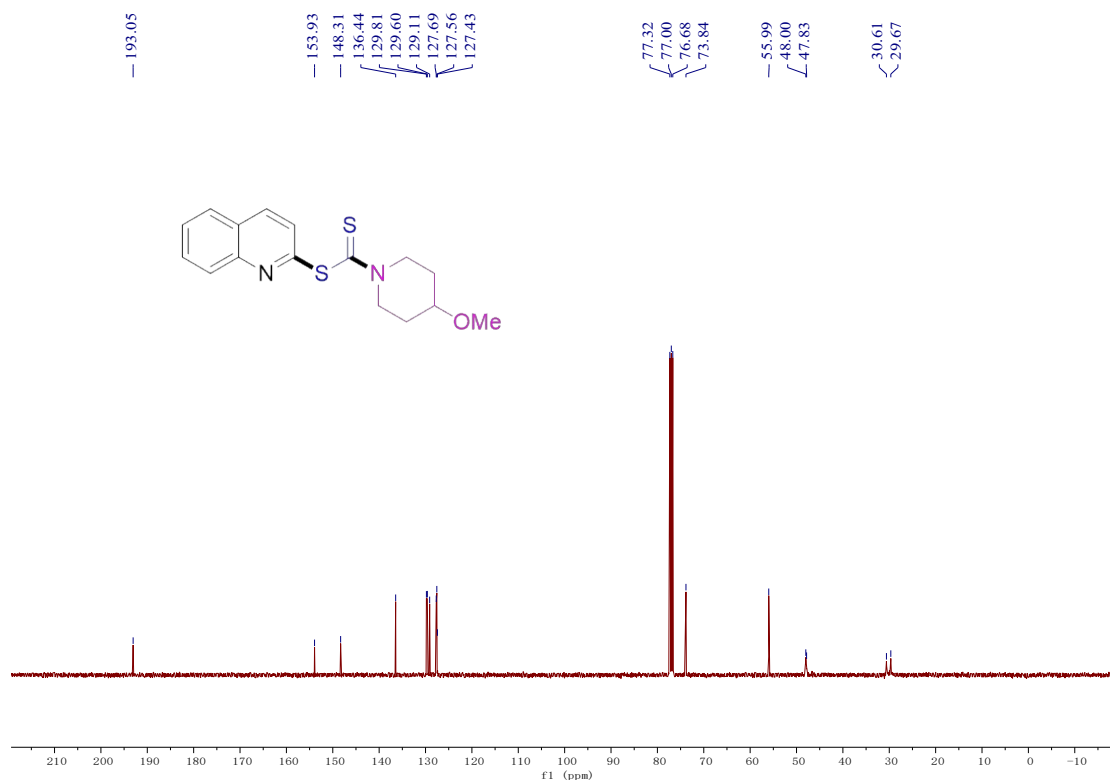

<sup>13</sup>C spectrum of compound 3ai

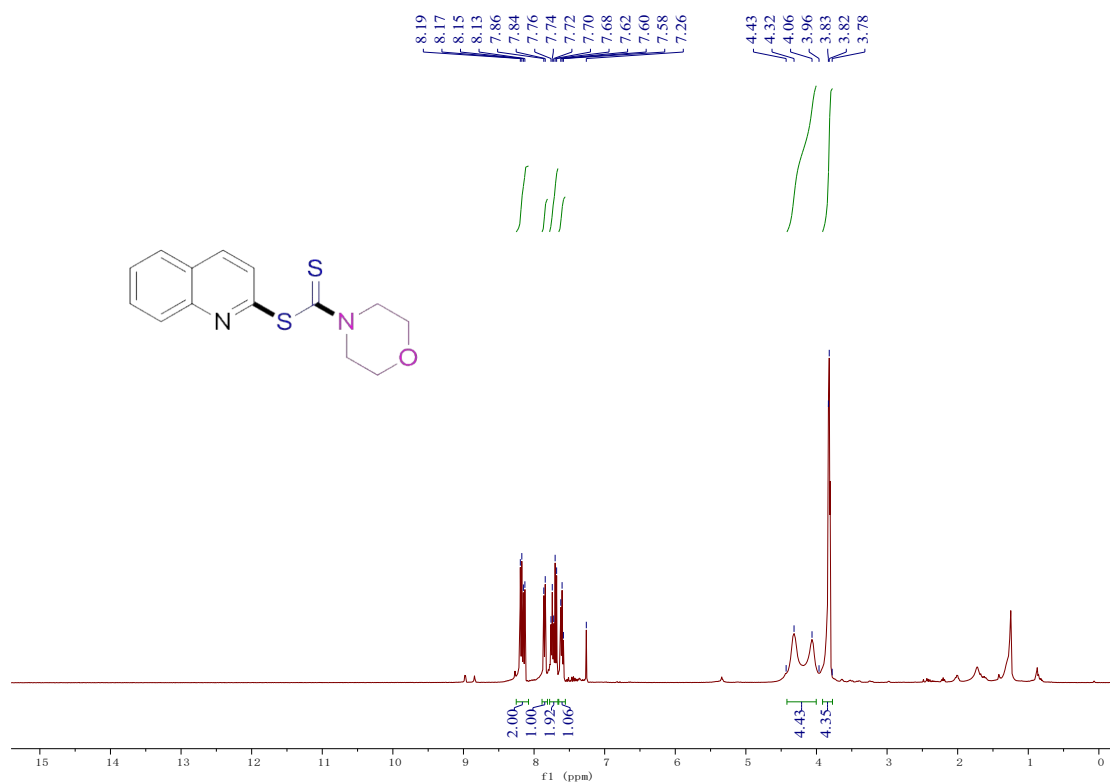

<sup>1</sup>H spectrum of compound **3aj**

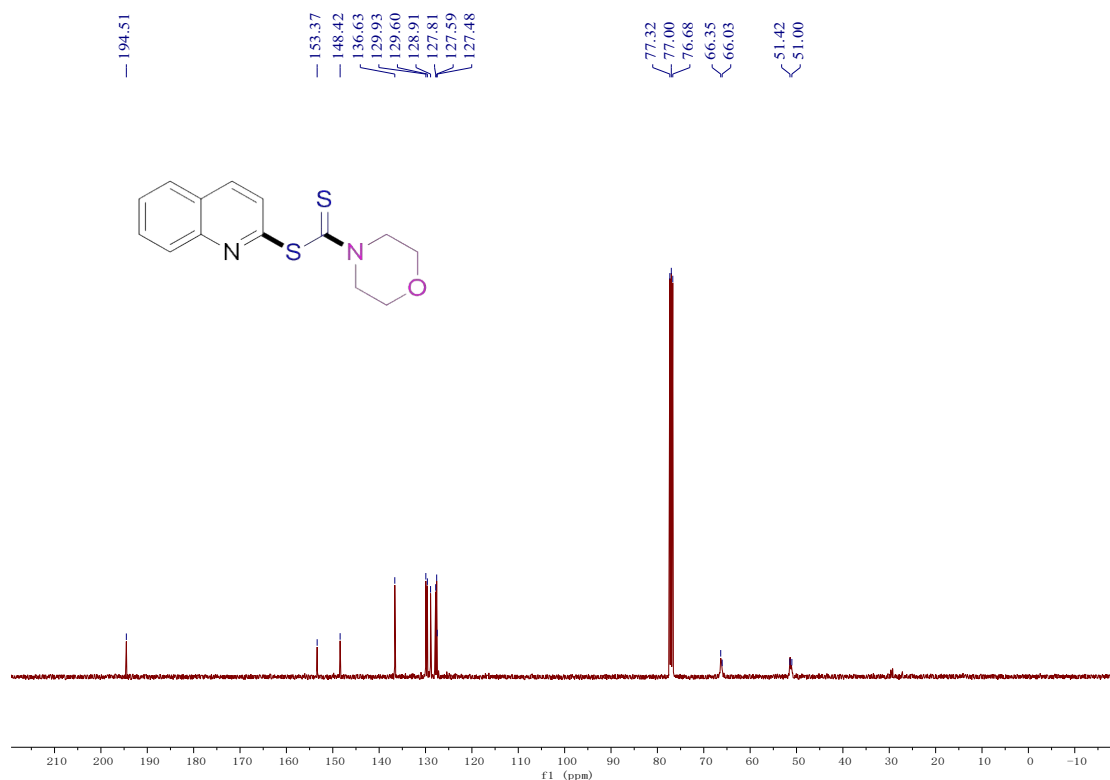

<sup>13</sup>C spectrum of compound **3aj**

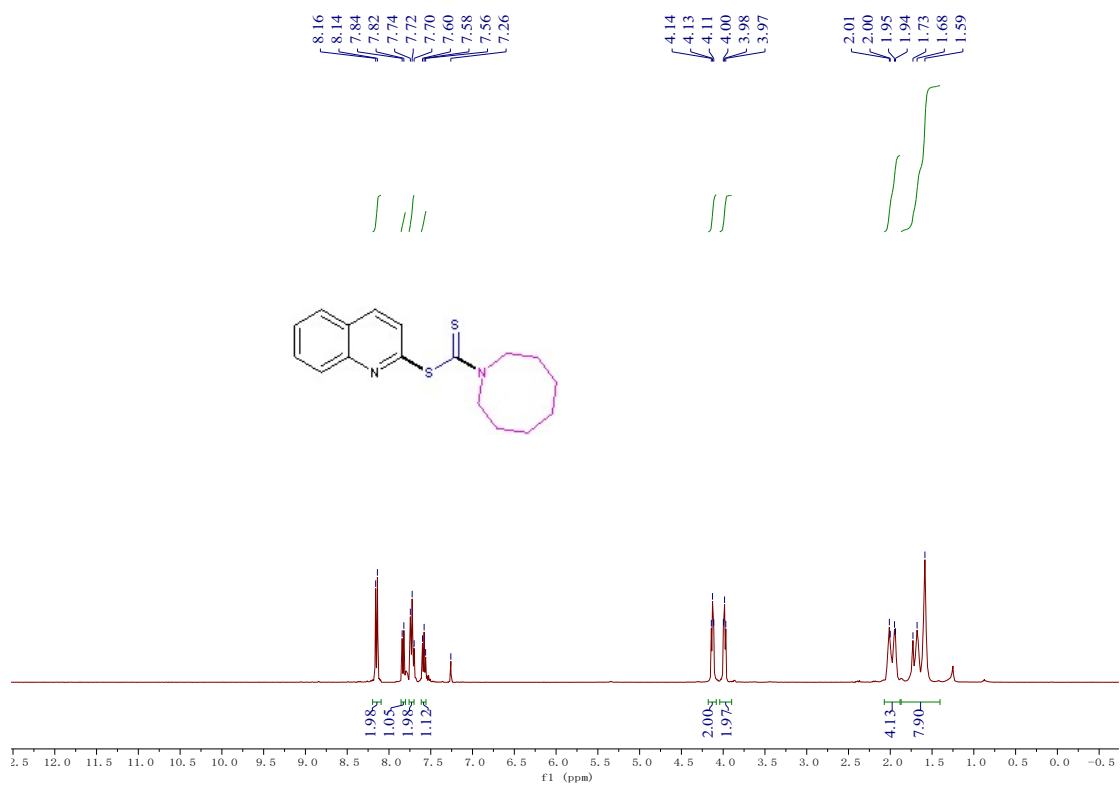

<sup>1</sup>H spectrum of compound **3ak**

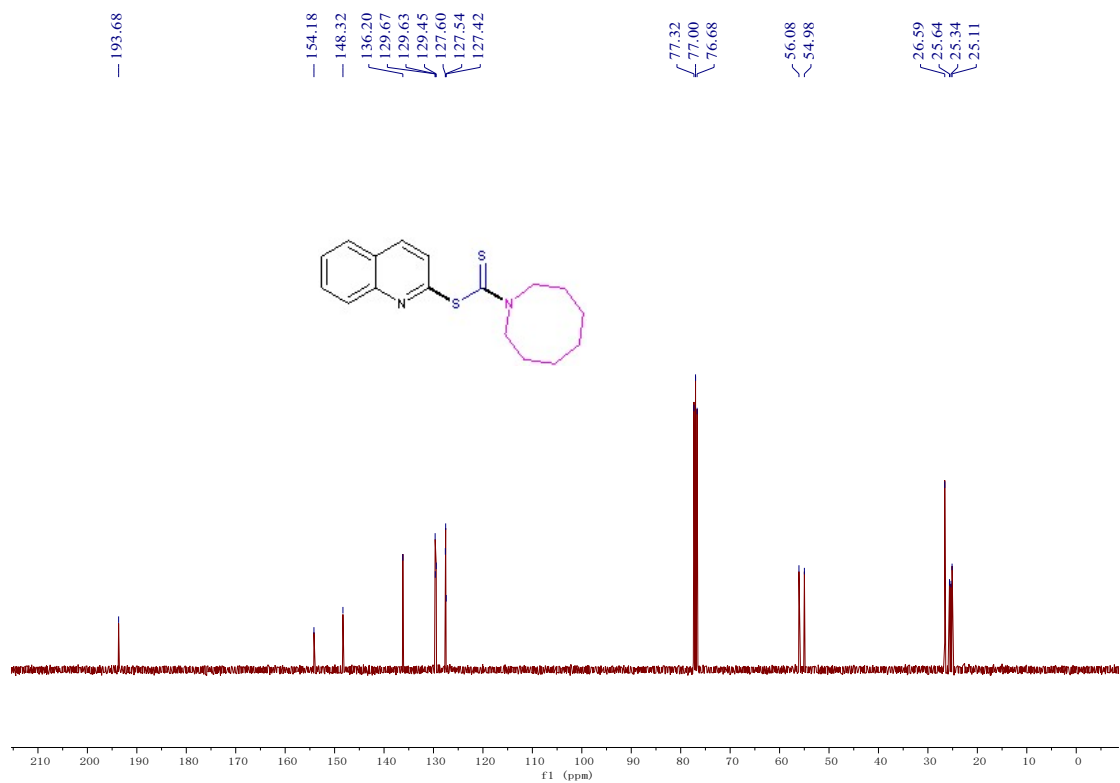

<sup>13</sup>C spectrum of compound **3ak**

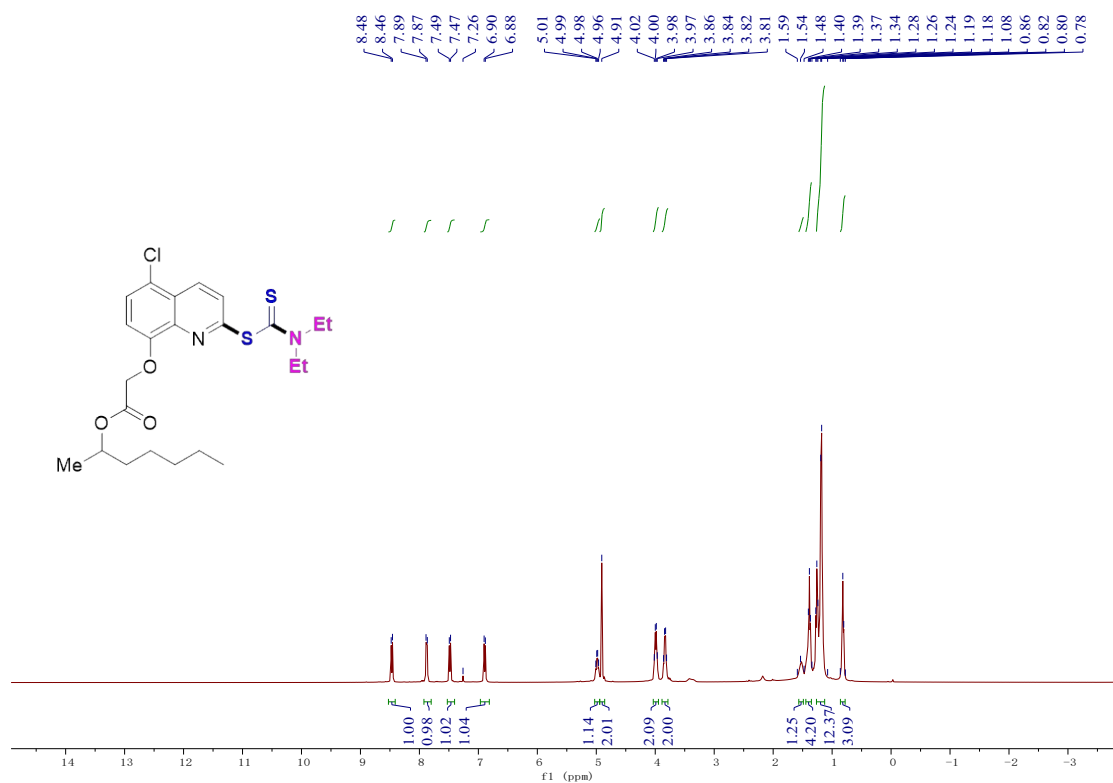

<sup>1</sup>H spectrum of compound 4ca

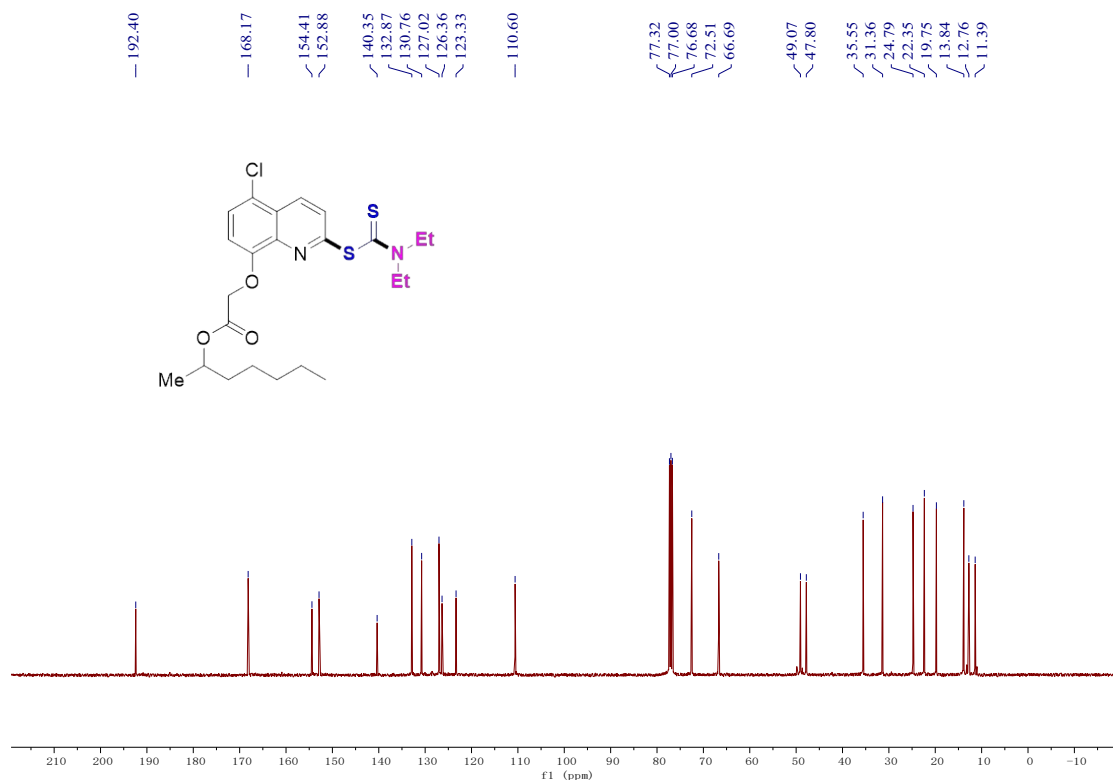

<sup>13</sup>C spectrum of compound 4ca
